# Supplementary material for: Catalyst-free generation of acyl radicals induced by visible light in water to construct C–N bonds
Source: Royal Society of Chemistry journal article supplement (doi:10.1039/d0ob02364g), 2021-01-01

## Catalyst-Free Generation of Acyl Radicals Induced by Visible Light in Water to Construct C-N Bonds

Maogang Ran, Jiaxin He, Boyu Yan, Wenbo Liu, Yi Li, Yunfen Fu, Chao-Jun Li\* and Qiuli Yao\*

### Supporting Information

|                                                                |     |
|----------------------------------------------------------------|-----|
| 1. General experiments.....                                    | S1  |
| 2. Mechanistic investigations.....                             | S1  |
| 3. Procedures for the synthesis of <b>6</b> and <b>4</b> ..... | S3  |
| 4. References.....                                             | S11 |
| 5. NMR Spectra.....                                            | S13 |

#### 1. General experiments

NMR spectra were recorded on an Agilent-NMR-VNMRs 400 MHz spectrometer or Bruker Advance 400 MHz spectrometer. Chemical shifts are reported in parts per million (ppm) and referenced to  $\text{CDCl}_3$  (7.26 ppm) or  $\text{DMSO-}d_6$  (3.33 ppm) for  $^1\text{H}$ NMR, and  $\text{CDCl}_3$  (77.16 ppm) or  $\text{DMSO-}d_6$  (39.52 ppm) for  $^{13}\text{C}$ NMR. High-resolution mass spectrometry used electro-spraying ionization (ESI) on a Thermo Scientific LTQ Orbitrap XL. Column chromatography was performed with Qing Dao silica gel. Compounds **1** and **2a** were used directly as purchase. Compounds **2b**, **2c**, and **2e-2p** were prepared according to reported reference.<sup>[1]</sup> Compounds **2d**, **2r-2t** were prepared according to literature.<sup>[2]</sup> All data for these compounds were in consistent with references.<sup>[1],[2]</sup>

#### 2. Mechanistic investigations

##### (1) UV-Vis absorption spectrum and reaction setup

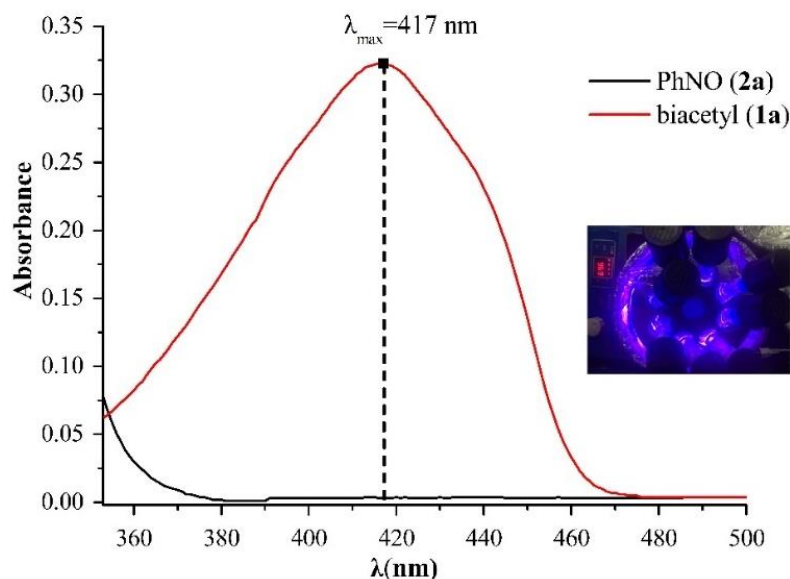

**Figure S1.** UV-Vis absorption spectrum of **1a** (4.5 mM) and **2a** (0.67 mM) in methanol; reaction setup (insert).

## (2) Procedure for the reaction of **1a** with TEMPO

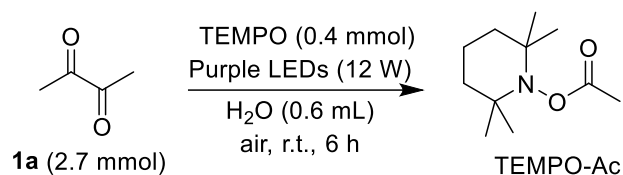

To a 10 mL flask in air were added **1a** (2.7 mmol), TEMPO (0.4 mmol) and water (0.6 mL). The mixture was irradiated by purple LEDs (12 W) at room temperature for 6 h. The solution was concentrated. After purified by column chromatography, 10 mg TEMPO-Ac was obtained: yield 12%, white solid,  $^1\text{H NMR}$  (400 MHz,  $\text{CDCl}_3$ ):  $\delta$  2.07 (s, 3H), 1.70–1.20 (m, 6H), 1.13 (s, 6H), 1.04 (s, 6H). GC-MS (EI)  $m/z$  199.0, 184.1, 157.1, 142.1, 126.1, 109.1. These data were in agreement with literature,<sup>[3]</sup> and the product has the same retention time as standard substance prepared according to literature<sup>[3]</sup> in GC-MS (EI).

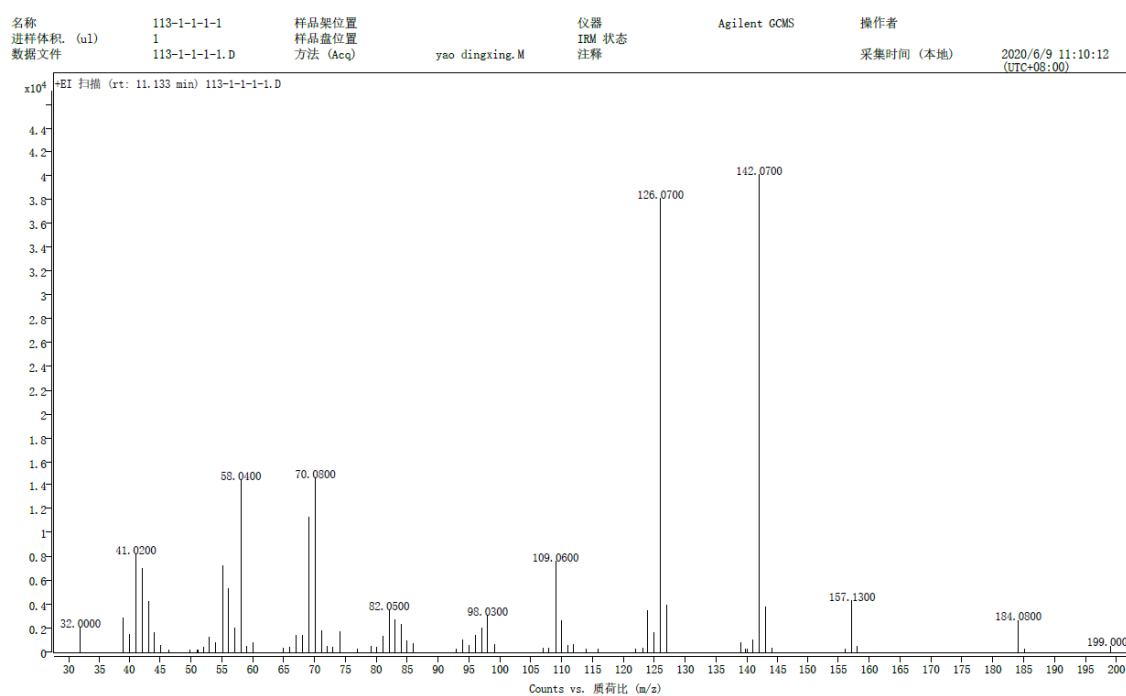

**Figure S2.** GC-MS (EI) spectrum of TEMPO-Ac.

### (3) MS spectrum of compound 7

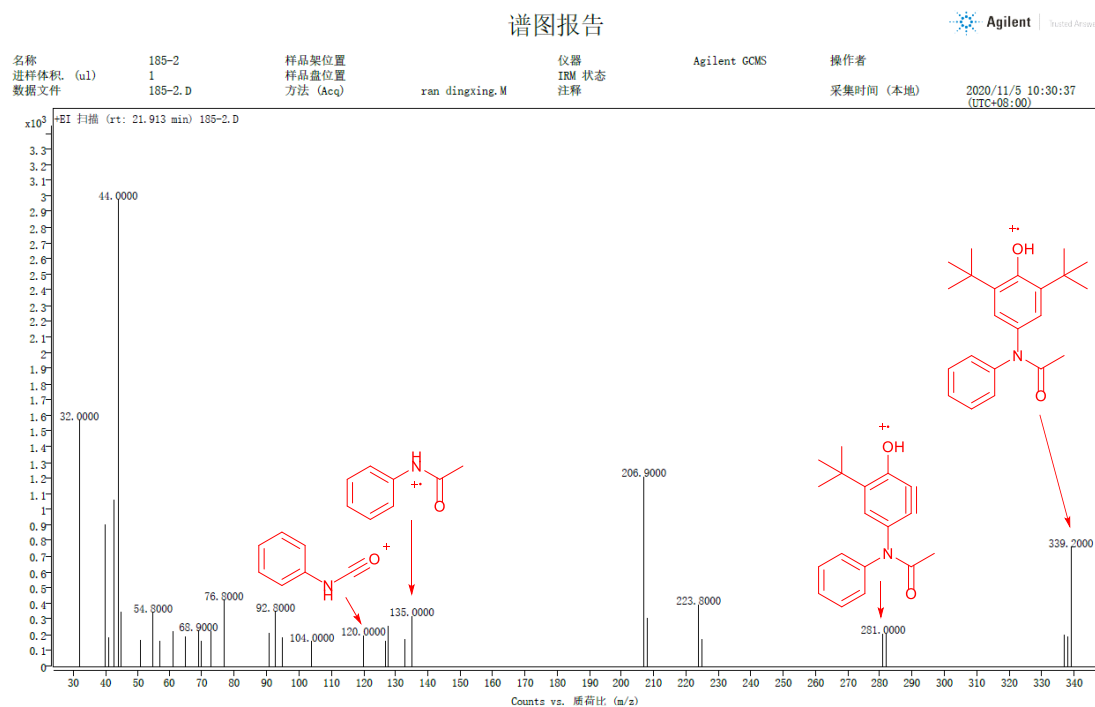

**Figure S3.** GC-MS (EI) spectrum of product 7 (possible fragment ions are shown in red).

1-1 #14 RT: 0.08 AV: 1 NL: 1.90E7  
T: FTMS + p ESI Full lock ms [80.0000-1200.000]

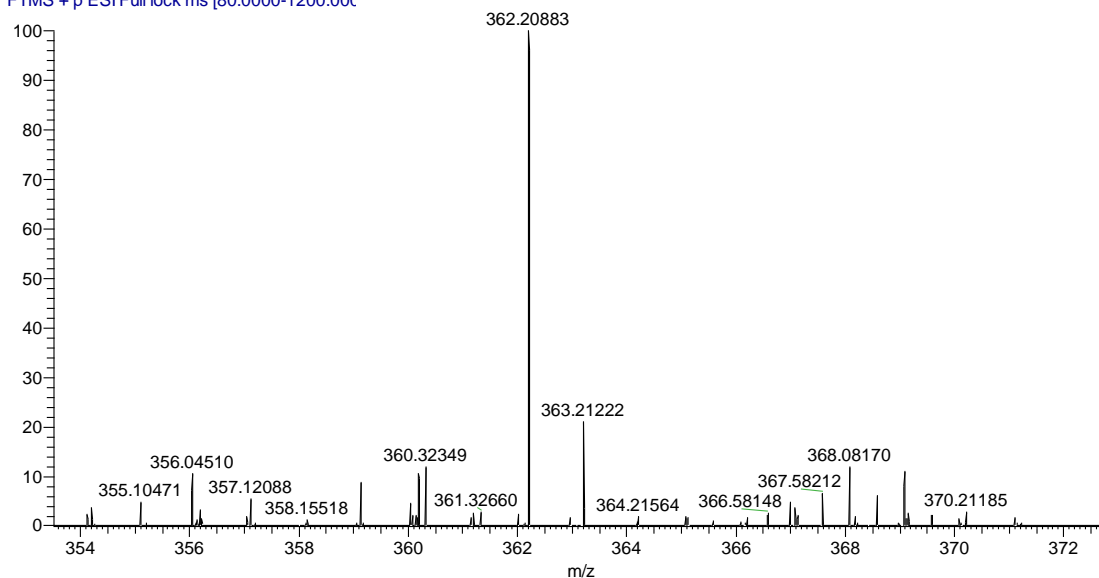

**Figure S4.** HR-MS (ESI) spectrum of product 7 (calcd for  $C_{22}H_{29}NNaO_2^+$  ( $M+Na$ ) $^+$  362.2090, found 362.2088).

### 3. Procedures for the synthesis of 6 and 4

#### (1) Procedures for the synthesis of 6

To a 10 mL flask in air were added **1** (2.7 mmol), **2** (0.4 mmol), acetic acid (2.4 mmol) and water (0.6 mL). The mixture was irradiated by purple LEDs (12 W) at room temperature for 12 h. Then, the reaction mixture was extracted with DCM (5 mL\*3). To the combined organic phases in a 25 mL flask was added  $NEt_3$  (0.1 mmol) and acetyl chloride (0.6 mmol) at 0 °C dropwise. Then the system was

warmed to room temperature. After 1 h, the mixture was concentrated and purified by column chromatography with EtOAc/petroleum ether as eluent (1:5) to give product **6**.

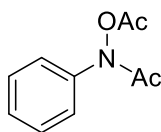

*N*-Acetyloxy-*N*-phenylacetamide (**6a**)<sup>[4],[5]</sup>: yield 89%, white solid, m.p. 37.6-38.3 °C; <sup>1</sup>H NMR (400 MHz, CDCl<sub>3</sub>) δ 7.50 – 7.30 (m, 5H), 2.15 (s, 3H), 2.03 (s, 3H); <sup>13</sup>C NMR (101 MHz, CDCl<sub>3</sub>) δ 167.8, 139.3, 129.4 (br), 21.4, 18.2.

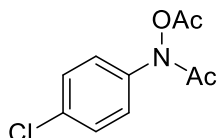

*N*-(Acetyloxy)-*N*-(4-chlorophenyl) acetamide (**6b**): yield 85%, yellow oil; <sup>1</sup>H NMR (400 MHz, CDCl<sub>3</sub>) δ 7.42 – 7.27 (m, 4H), 2.15 (s, 3H), 2.03 (s, 3H); <sup>13</sup>C NMR (101 MHz, CDCl<sub>3</sub>) δ 167.8, 137.8, 129.5 (br), 21.3, 18.2.

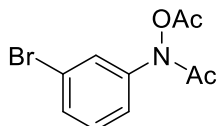

*N*-(Acetyloxy)-*N*-(3-bromophenyl) acetamide (**6c**)<sup>[4]</sup>: yield 84%, yellow oil; <sup>1</sup>H NMR (400 MHz, CDCl<sub>3</sub>) δ 7.66 (t, *J* = 1.9 Hz, 1H), 7.50 – 7.36 (m, 2H), 7.28 (t, *J* = 8.0 Hz, 1H), 2.22 (s, 3H), 2.10 (s, 3H); <sup>13</sup>C NMR (101 MHz, CDCl<sub>3</sub>) δ 167.8, 140.4, 130.5 (br), 122.5, 21.5, 18.3.

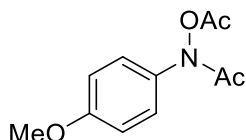

*N*-(Acetyloxy)-*N*-(4-methoxyphenyl) acetamide (**6d**): yield 91%, yellow oil; <sup>1</sup>H NMR (400 MHz, CDCl<sub>3</sub>) δ 7.38 (d, *J* = 8.8 Hz, 2H), 6.83 (d, *J* = 8.8 Hz, 2H), 3.77 (s, 3H), 2.23 (s, 3H), 2.12 (s, 3H); <sup>13</sup>C NMR (101 MHz, CDCl<sub>3</sub>) δ 167.8, 137.8, 129.5 (br), 55.5, 21.4, 18.2.

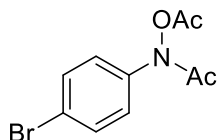

*N*-(Acetyloxy)-*N*-(4-bromophenyl) acetamide (**6e**)<sup>[5]</sup>: yield 84%, yellow oil; <sup>1</sup>H NMR (400 MHz, CDCl<sub>3</sub>) δ 7.52 (d, *J* = 7.8 Hz, 2H), 7.32 (d, *J* = 8.7 Hz, 2H), 2.18 (s, 3H), 2.06 (s, 3H); <sup>13</sup>C NMR (101 MHz, CDCl<sub>3</sub>) δ 167.9, 138.3, 132.6 (br), 21.4, 18.3.

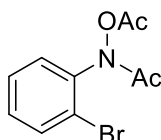

*N*-(Acetyloxy)-*N*-(2-bromophenyl) acetamide (**6f**)<sup>[6]</sup>: yield 80%, yellow oil; <sup>1</sup>H NMR (400 MHz, CDCl<sub>3</sub>) δ 7.76-7.52 (m, 2H), 7.46-7.35 (m, 1H), 7.35-7.25 (m, 1H), 2.15 (s, 3H), 1.91 (s, 3H); <sup>13</sup>C NMR (101 MHz, CDCl<sub>3</sub>) δ 168.0, 166.2, 137.0, 132.3, 131.9, 130.8, 128.2 (br), 21.0, 18.4.

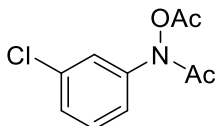

*N*-(Acetyloxy)-*N*-(3-chlorophenyl) acetamide (**6g**)<sup>[5]</sup>: yield 84%, yellow oil; <sup>1</sup>H NMR (400 MHz, CDCl<sub>3</sub>) δ 7.54 (s, 1H), 7.44 – 7.23 (m, 3H), 2.26 (s, 3H), 2.14 (s, 3H); <sup>13</sup>C NMR (101 MHz, CDCl<sub>3</sub>) δ 167.8, 140.2, 134.6, 130.2 (br), 21.4, 18.2.

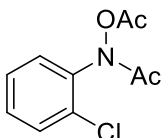

*N*-(Acetyloxy)-*N*-(2-chlorophenyl) acetamide (**6h**)<sup>[5]</sup>: yield 82%, yellow oil; <sup>1</sup>H NMR (400 MHz, CDCl<sub>3</sub>) δ 7.37 (s, 1H), 7.28 – 7.10 (m, 3H), 2.09 (s, 3H), 1.97 (s, 3H); <sup>13</sup>C NMR (101 MHz, CDCl<sub>3</sub>) δ 168.5, 166.0, 136.5, 131.9 (br), 130.5, 127.4, 124.6, 21.5, 18.3.

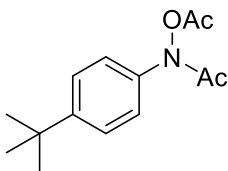

*N*-(Acetyloxy)-*N*-(4-tertiarybutylphenyl) acetamide (**6i**): yield 88%, white solid, m.p. 42.1-42.4 °C; <sup>1</sup>H NMR (400 MHz, CDCl<sub>3</sub>) δ 7.41 (d, *J* = 7.5 Hz, 2H), 7.35 (d, *J* = 8.3 Hz, 2H), 2.15 (s, 3H), 2.01 (s, 3H), 1.30 (s, 9H); <sup>13</sup>C NMR (101 MHz, CDCl<sub>3</sub>) δ 167.6, 165.3, 136.5, 128.0 (br), 126.3 (br), 34.6, 31.0, 21.4, 18.1. HRMS (ESI) *m/z* calcd for C<sub>14</sub>H<sub>20</sub>NO<sub>3</sub><sup>+</sup> (M+H)<sup>+</sup> 250.1438, found 250.1440.

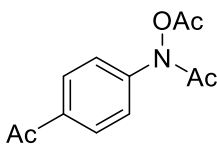

*N*-(Acetyloxy)-*N*-(4-acetophenone) acetamide (**6j**): yield 86%, white solid, m.p. 74.7-75.5 °C; <sup>1</sup>H NMR (400 MHz, CDCl<sub>3</sub>) δ 7.96 (d, *J* = 8.7 Hz, 2H), 7.54 (d, *J* = 8.7 Hz, 2H), 2.57 (s, 3H), 2.25 (s, 3H), 2.14 (s, 3H); <sup>13</sup>C NMR (101 MHz, CDCl<sub>3</sub>) δ 196.8, 167.9, 143.1, 129.4 (br), 26.7, 21.8, 18.4. HRMS (ESI) *m/z* calcd for C<sub>12</sub>H<sub>13</sub>NO<sub>4</sub>Na<sup>+</sup> (M+Na)<sup>+</sup> 258.0737, found 258.0740.

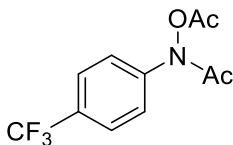

*N*-(Acetyloxy)-*N*-(4-trifluoromethylphenyl) acetamide (**6k**): yield 79%, yellow oil; <sup>1</sup>H NMR (400 MHz, CDCl<sub>3</sub>) δ 7.61 (d, *J* = 8.9 Hz, 2H), 7.57 (d, *J* = 8.8 Hz, 2H), 2.21 (s, 3H), 2.12 (s, 3H); <sup>13</sup>C NMR (101 MHz, CDCl<sub>3</sub>) δ 167.9, 142.2, 126.3 (br), 123.7 (q, *J* = 270.3 Hz), 21.5, 18.2; <sup>19</sup>F NMR (376 MHz, CDCl<sub>3</sub>) δ -62.49, -62.73. HRMS (ESI) *m/z* calcd for C<sub>11</sub>H<sub>11</sub>F<sub>3</sub>NO<sub>3</sub><sup>+</sup> (M+H)<sup>+</sup> 262.0686, found 263.0687.

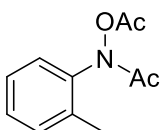

*N*-Acetoxy-*N*-(*o*-tolyl)acetamide (**6l**)<sup>[4]</sup>: yield 87%, yellow oil; <sup>1</sup>H NMR (400 MHz, CDCl<sub>3</sub>) δ 7.55-7.44 (m, 1H), 7.40-7.29 (m, 2H), 7.29-7.16 (m, 1H), 2.38 (s, 3H), 2.13 (s, 3H), 1.90 (s, 3H); <sup>13</sup>C NMR (101 MHz, CDCl<sub>3</sub>) δ 167.2, 165.9, 137.8, 137.6, 131.2, 130.4, 129.9, 127.0, 20.8, 18.0, 17.3.

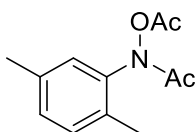

*N*-Acetoxy-*N*-(2,5-dimethylphenyl)acetamide(**6m**): yield 92%, yellow oil; <sup>1</sup>H NMR (400 MHz, CDCl<sub>3</sub>) δ 7.28 (s, 1H), 7.20-7.07 (m, 2H), 2.30 (s, 6H), 2.14 (s, 3H), 1.89 (s, 3H); <sup>13</sup>C NMR (101 MHz, CDCl<sub>3</sub>) δ 167.6, 166.1, 137.9, 137.2, 134.6, 131.4, 131.2, 130.5, 21.2, 20.7, 18.4, 17.1.

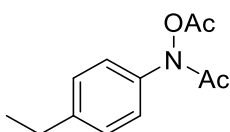

*N*-Acetoxy-*N*-(4-ethylphenyl)acetamide(**6n**): yield 90%, yellow oil; <sup>1</sup>H NMR (400 MHz, CDCl<sub>3</sub>) δ 7.34 (d, *J* = 8.2 Hz, 2H), 7.24 (d, *J* = 8.6 Hz, 2H), 2.64 (q, *J* = 7.2 Hz, 2H), 2.14 (s, 3H), 2.01 (s, 3H), 1.21 (t, *J* = 7.5 Hz, 3H); <sup>13</sup>C NMR (101 MHz, CDCl<sub>3</sub>) δ 167.0, 165.0, 145.8, 136.3, 128.3 (br), 123.6 (br), 27.7, 20.7, 17.4, 14.7. HRMS (ESI) *m/z* calcd for C<sub>12</sub>H<sub>15</sub>NO<sub>3</sub>Na<sup>+</sup> (*M*+Na)<sup>+</sup> 244.0944, found 244.0944.

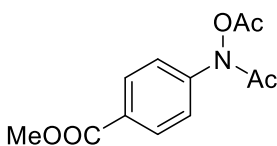

Methyl 4-(*N*-acetoxyacetamido)benzoate(**6o**): yield 93%, white solid, m.p. 79.5-80.0°C; <sup>1</sup>H NMR (400 MHz, CDCl<sub>3</sub>) δ 8.05 (d, *J* = 8.7 Hz, 2H), 7.53 (d, *J* = 8.7 Hz, 2H), 3.90 (s, 3H), 2.25 (s, 3H), 2.14 (s, 3H); <sup>13</sup>C NMR (101 MHz, CDCl<sub>3</sub>) δ 167.9, 166.2, 143.1, 130.7 (br), 52.4, 21.8, 18.4. HRMS (ESI) *m/z* calcd for C<sub>12</sub>H<sub>13</sub>NO<sub>5</sub>Na<sup>+</sup> (*M*+Na)<sup>+</sup> 274.0686, found 274.0686.

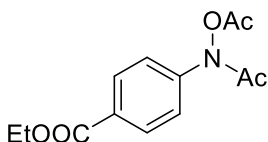

Ethyl 4-(*N*-acetoxyacetamido)benzoate (**6p**): yield 94%, white solid, m.p. 90.9-91.7 °C; <sup>1</sup>H NMR (400 MHz, CDCl<sub>3</sub>) δ 8.06 (d, *J* = 8.6 Hz, 2H), 7.52 (d, *J* = 8.7 Hz, 2H), 4.36 (q, *J* = 7.1 Hz, 2H), 2.24 (s, 3H), 2.13 (s, 3H), 1.37 (t, *J* = 7.1 Hz, 3H); <sup>13</sup>C NMR (101 MHz, CDCl<sub>3</sub>) δ 165.9, 167.7, 143.0, 130.7 (br), 61.3, 21.8, 18.4, 14.4. HRMS (ESI) *m/z* calcd for C<sub>13</sub>H<sub>15</sub>NO<sub>5</sub>Na<sup>+</sup> (*M*+Na)<sup>+</sup> 288.0842, found 288.0843.

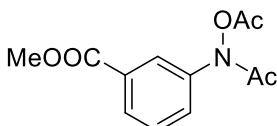

Methyl 3-(*N*-acetoxyacetamido)benzoate (**6q**): yield 90%, yellow oil; <sup>1</sup>H NMR (400 MHz, CDCl<sub>3</sub>) δ 8.06 (s, 1H), 8.00-7.90 (m, 1H), 7.67 (d, *J* = 7.6 Hz, 1H), 7.48 (t, *J* = 6.9 Hz, 1H), 3.89 (s, 3H), 2.20 (s, 3H), 2.09 (s, 3H); <sup>13</sup>C NMR (101 MHz, CDCl<sub>3</sub>) δ 167.8, 165.7, 139.3, 131.2, 129.3 (br), 52.2, 21.3, 18.1. HRMS (ESI) *m/z* calcd for C<sub>12</sub>H<sub>13</sub>NO<sub>5</sub>Na<sup>+</sup> (*M*+Na)<sup>+</sup> 274.0686, found 274.0686.

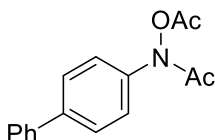

*N*-([1,1'-Biphenyl]-4-yl)-*N*-acetoxyacetamide (**6r**): yield 75%, white solid, m.p. 115.1-115.3 °C; <sup>1</sup>H NMR (400 MHz, CDCl<sub>3</sub>) δ 7.64 (d, *J* = 8.2 Hz, 2H), 7.58 (d, *J* = 8.2 Hz, 2H), 7.53 (d, *J* = 8.2 Hz, 2H), 7.45 (t, *J* = 8.2 Hz, 2H), 7.37 (t, *J* = 12 Hz, 1H), 2.22 (s, 3H), 2.12 (s, 3H); <sup>13</sup>C NMR (101 MHz, CDCl<sub>3</sub>) δ 168.0, 139.8, 138.4, 129.0, 128.1 (br), 128.0 (br), 127.2, 21.6, 18.4.

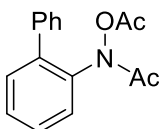

*N*-([1,1'-Biphenyl]-2-yl)-*N*-acetoxyacetamide (**6s**): yield 72%, white solid, m.p. 94.9-95.2 °C; <sup>1</sup>H NMR (400 MHz, CDCl<sub>3</sub>) δ 7.68 (d, *J* = 6.3 Hz, 1H), 7.60-7.32 (m, 8H), 2.21 (s, 3H), 1.63 (s, 3H); <sup>13</sup>C NMR (101 MHz, CDCl<sub>3</sub>) δ 167.9, 165.1, 142.1, 137.8, 136.8, 131.3, 130.9, 130.7 (br), 128.8 (br), 128.2, 20.9, 18.5.

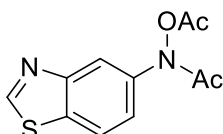

*N*-Acetoxy-*N*-(benzo[d]thiazol-5-yl)acetamide (**6t**): yield 77%, white solid, m.p. 80.1-80.4 °C; <sup>1</sup>H NMR (400 MHz, CDCl<sub>3</sub>) δ 9.06 (s, 1H), 8.19 (s, 1H), 7.98 (d, *J* = 8.6 Hz, 1H), 7.59 (d, *J* = 8.6 Hz, 1H), 2.19 (s, 3H), 2.10 (s, 3H); <sup>13</sup>C NMR (101 MHz, CDCl<sub>3</sub>) δ 167.9, 156.1, 153.7, 137.9, 122.6 (br), 21.6, 18.4. HRMS (ESI) *m/z* calcd for C<sub>11</sub>H<sub>11</sub>N<sub>2</sub>O<sub>3</sub>S<sup>+</sup> (M+H)<sup>+</sup> 251.0485, found 251.0488.

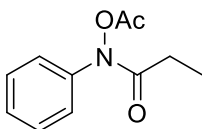

*N*-Acetoxy-*N*-phenylpropionamide (**6u**): yield 44%, yellow oil; <sup>1</sup>H NMR (400 MHz, CDCl<sub>3</sub>) δ 7.55-7.26 (m, 5H), 2.25 (br, 2H), 2.16 (s, 3H), 1.11 (t, *J* = 7.4 Hz, 3H); <sup>13</sup>C NMR (101 MHz, CDCl<sub>3</sub>) δ 167.5, 138.9, 129.0 (br), 26.3, 17.7, 8.4. HRMS (ESI) *m/z* calcd for C<sub>11</sub>H<sub>14</sub>NO<sub>3</sub><sup>+</sup> (M+H)<sup>+</sup> 208.0968, found 208.0970.

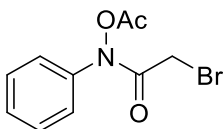

*N*-Acetoxy-2-bromo-*N*-phenylacetamide (**6v**): yield 57%, yellow oil; <sup>1</sup>H NMR (400 MHz, CDCl<sub>3</sub>) δ 7.50-7.44 (m, 5H), 3.74 (s, 2H), 2.17 (s, 3H); <sup>13</sup>C NMR (400 MHz, CDCl<sub>3</sub>) δ 167.0, 161.6, 137.8, 130.4, 129.4, 128.2, 123.0, 20.3, 17.7. HRMS (ESI) *m/z* calcd for C<sub>10</sub>H<sub>10</sub>BrNO<sub>3</sub>Na<sup>+</sup> (M+Na)<sup>+</sup> 293.9736, found 293.9739.

## (2) Procedures for the reaction of 1 and 2 in the synthesis of 4

To a 10 mL flask in water (0.6 mL) and acetone (3 mL) at room temperature were added **1** (1.1 mmol), **2** (0.4 mmol) and NaCl (0.8 mmol, 47 mg) under argon. The reaction mixture was irradiated by purple LEDs

(12 W) at room temperature for 12 h. Then, the reaction mixture was extracted with DCM (5 mL\*3). The organic phases were combined and dried over anhydrous Na<sub>2</sub>SO<sub>4</sub> for 1 hour. After that the filtrate was concentrated and purified by column chromatography with EtOAc/petroleum ether as eluent (1:5) to give product **4**.

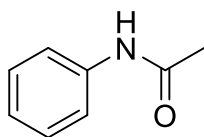

*N*-Phenylacetamide (**4a**)<sup>[7]</sup>: yield 76%, white solid, m.p. 113.9-114.8 °C; <sup>1</sup>H NMR (400 MHz, DMSO-*d*<sub>6</sub>) δ 9.89 (s, 1H), 7.53 (d, *J* = 7.9 Hz, 2H), 7.24 (t, *J* = 7.9 Hz, 2H), 6.98 (t, *J* = 7.4 Hz, 1H), 2.00 (s, 3H); <sup>13</sup>C NMR (101 MHz, DMSO-*d*<sub>6</sub>) δ 168.3, 139.4, 128.7, 123.0, 119.0, 24.0.

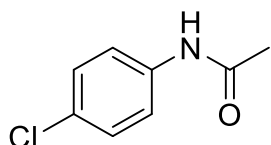

*N*-(4-Chlorophenyl)acetamide (**4b**)<sup>[8]</sup>: yield 68%, white solid, m.p. 177.1-178.0 °C; <sup>1</sup>H NMR (400 MHz, DMSO-*d*<sub>6</sub>) δ 10.05 (s, 1H), 7.58 (d, *J* = 8.7 Hz, 2H), 7.32 (d, *J* = 8.7 Hz, 2H), 2.02 (s, 3H); <sup>13</sup>C NMR (101 MHz, DMSO-*d*<sub>6</sub>) δ 168.5, 138.3, 128.6, 126.5, 120.5, 24.0.

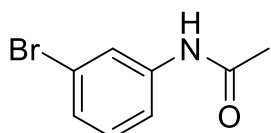

*N*-(3-Bromophenyl)acetamide (**4c**)<sup>[9]</sup>: yield 67%, white solid, m.p. 77.7-78.7 °C; <sup>1</sup>H NMR (400 MHz, DMSO-*d*<sub>6</sub>) δ 10.09 (s, 1H), 7.93 (s, 1H), 7.44 (d, *J* = 7.8 Hz, 1H), 7.26 – 7.18 (m, 2H), 2.03 (s, 3H); <sup>13</sup>C NMR (101 MHz, DMSO-*d*<sub>6</sub>) δ 168.7, 140.9, 130.7, 125.6, 121.6, 121.2, 117.7, 24.1.

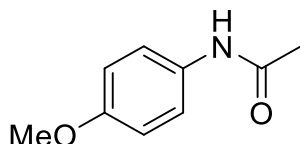

*N*-(4-Methoxyphenyl)acetamide (**4d**)<sup>[7]</sup>: yield 72%, white solid, m.p. 125.4-126.0 °C; <sup>1</sup>H NMR (400 MHz, DMSO-*d*<sub>6</sub>) δ 9.75 (s, 1H), 7.47 (d, *J* = 9.0 Hz, 1H), 6.85 (d, *J* = 9.0 Hz, 1H), 3.70 (s, 3H), 1.99 (s, 3H); <sup>13</sup>C NMR (101 MHz, DMSO-*d*<sub>6</sub>) δ 167.8, 155.0, 132.6, 120.5, 113.8, 55.1, 23.8.

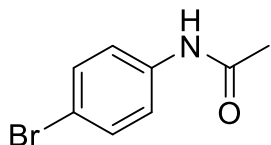

*N*-(4-Bromophenyl)acetamide (**4e**)<sup>[7]</sup>: yield 67%, white solid, m.p. 166.5-166.7 °C; <sup>1</sup>H NMR (400 MHz, DMSO-*d*<sub>6</sub>) δ 10.05 (s, 1H), 7.53 (d, *J* = 8.8 Hz, 2H), 7.44 (d, *J* = 8.8 Hz, 2H), 2.01 (s, 3H); <sup>13</sup>C NMR (101 MHz, DMSO-*d*<sub>6</sub>) δ 168.5, 138.7, 131.5, 120.9, 114.5, 24.1.

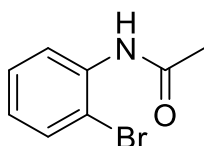

*N*-(2-Bromophenyl)acetamide (**4f**)<sup>[10]</sup>: yield 62%, white solid, m.p. 95.6-96.0 °C; <sup>1</sup>H NMR (400



MHz, DMSO-*d*<sub>6</sub>)  $\delta$  9.46 (s, 1H), 7.63 (d, *J* = 7.9 Hz, 1H), 7.57 (d, *J* = 7.8 Hz, 1H), 7.34 (t, *J* = 7.5 Hz, 1H), 7.11 (t, *J* = 7.5 Hz, 1H), 2.06 (s, 3H); <sup>13</sup>C NMR (101 MHz, DMSO-*d*<sub>6</sub>)  $\delta$  168.5, 136.4, 132.6, 127.9, 127.3, 126.9, 117.9, 23.3.

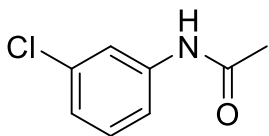

*N*-(3-Chlorophenyl)acetamide (**4g**)<sup>[7]</sup>: yield 65%, white solid, m.p. 68.5-69.2 °C; <sup>1</sup>H NMR (400 MHz, DMSO-*d*<sub>6</sub>)  $\delta$  10.09 (s, 1H), 7.76 (s, 1H), 7.36 (d, *J* = 8.2 Hz, 1H), 7.26 (t, *J* = 8.1 Hz, 1H), 7.03 (d, *J* = 7.9 Hz, 1H), 2.00 (s, 3H); <sup>13</sup>C NMR (101 MHz, DMSO-*d*<sub>6</sub>)  $\delta$  168.6, 140.7, 133.0, 130.3, 122.6, 118.4, 117.3, 24.0.

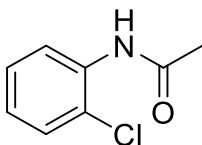

*N*-(2-Chlorophenyl)acetamide (**4h**)<sup>[7],[10]</sup>: yield 61%, white solid, m.p. 83.2-83.7 °C; <sup>1</sup>H NMR (400 MHz, DMSO-*d*<sub>6</sub>)  $\delta$  9.46 (s, 1H), 7.67 (d, *J* = 7.9 Hz, 1H), 7.42 (dd, *J* = 8.0 Hz, 1H), 7.26 (td, *J* = 7.9, 1.3 Hz, 1H), 7.12 (td, *J* = 8.2, 2.0 Hz, 1H), 2.06 (s, 3H); <sup>13</sup>C NMR (101 MHz, DMSO-*d*<sub>6</sub>)  $\delta$  168.6, 135.1, 129.4, 127.3, 126.4, 126.2, 126.1, 23.3.

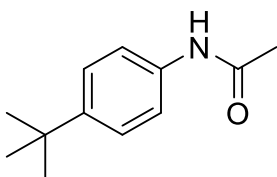

*N*-(4-(Tert-butyl)phenyl)acetamide (**4i**)<sup>[11]</sup>: yield 75%, white solid, m.p. 168.2-169.3 °C; <sup>1</sup>H NMR (400 MHz, DMSO-*d*<sub>6</sub>)  $\delta$  9.82 (s, 1H), 7.45 (d, *J* = 8.5 Hz, 2H), 7.26 (d, *J* = 8.6 Hz, 2H), 1.99 (s, 3H), 1.22 (s, 9H); <sup>13</sup>C NMR (101 MHz, DMSO-*d*<sub>6</sub>)  $\delta$  168.1, 145.2, 136.8, 125.3, 118.8, 34.0, 31.2, 24.0.

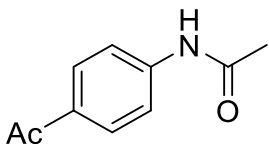

*N*-(4-Acetylphenyl)acetamide (**4j**)<sup>[12]</sup>: yield 70%, white solid, m.p. 169.2-170.0 °C; <sup>1</sup>H NMR (400 MHz, DMSO-*d*<sub>6</sub>)  $\delta$  10.21 (s, 1H), 7.86 (d, *J* = 8.8 Hz, 2H), 7.66 (d, *J* = 8.8 Hz, 2H), 2.46 (s, 3H), 2.04 (s, 3H). <sup>13</sup>C NMR (101 MHz, DMSO-*d*<sub>6</sub>)  $\delta$  196.4, 168.9, 143.7, 131.5, 129.4, 118.1, 26.4, 24.2.

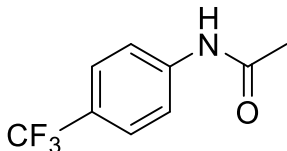

*N*-(4-(Trifluoromethyl)phenyl)acetamide (**4k**)<sup>[13]</sup>: yield 64%, white solid, m.p. 105.5-106.4 °C; <sup>1</sup>H NMR (400 MHz, DMSO-*d*<sub>6</sub>)  $\delta$  10.23 (s, 1H), 7.73 (d, *J* = 8.2 Hz, 2H), 7.58 (d, *J* = 8.3 Hz, 2H), 2.03 (s, 3H); <sup>13</sup>C NMR (101 MHz, DMSO-*d*<sub>6</sub>)  $\delta$  169.0, 142.8, 126.0 (q, *J* = 3.8 Hz), 124.4 (q, *J* = 272.1 Hz), 123.0 (q, *J* = 32.0 Hz), 118.8, 24.1; <sup>19</sup>F NMR (376 MHz, DMSO-*d*<sub>6</sub>)  $\delta$  -60.33.

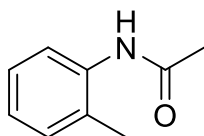

*N*-(*o*-Tolyl)acetamide (**4l**)<sup>[7]</sup>: yield 78%, white solid, m.p. 103.9-104.3 °C; <sup>1</sup>H NMR (400 MHz, DMSO-*d*<sub>6</sub>) δ 9.25 (s, 1H), 7.36 (d, *J* = 7.8 Hz, 1H), 7.17 (d, *J* = 7.3 Hz, 1H), 7.12 (t, *J* = 7.4 Hz, 1H), 7.04 (t, *J* = 7.3 Hz, 1H), 2.17 (s, 3H), 2.03 (s, 3H); <sup>13</sup>C NMR (101 MHz, DMSO-*d*<sub>6</sub>) δ 140.7, 135.9, 132.2, 130.4, 129.1, 125.5, 122.5, 20.5, 17.0.

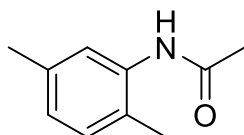

*N*-(2,5-Dimethylphenyl)acetamide (**4m**)<sup>[14]</sup>: yield 79%, white solid, m.p. 139.2-140.1 °C; <sup>1</sup>H NMR (400 MHz, DMSO-*d*<sub>6</sub>) δ 9.18 (s, 1H), 7.17 (s, 1H), 7.02 (d, *J* = 7.6 Hz, 1H), 6.84 (d, *J* = 7.5 Hz, 1H), 2.20 (s, 3H), 2.10 (s, 3H), 2.00 (s, 3H); <sup>13</sup>C NMR (101 MHz, DMSO-*d*<sub>6</sub>) δ 168.1, 136.3, 134.8, 130.0, 128.4, 125.65, 125.56, 23.3, 20.6, 17.5.

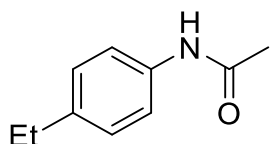

*N*-(4-Ethylphenyl)acetamide (**4n**)<sup>[15]</sup>: yield 79%, white solid, m.p. 85.8-86.1 °C; <sup>1</sup>H NMR (400 MHz, DMSO-*d*<sub>6</sub>) δ 9.81 (s, 1H), 7.44 (d, *J* = 8.4 Hz, 2H), 7.09 (d, *J* = 8.4 Hz, 2H), 2.51 (q, *J* = 7.6 Hz, 2H), 1.99 (s, 3H), 1.12 (t, *J* = 7.6 Hz, 3H); <sup>13</sup>C NMR (101 MHz, DMSO-*d*<sub>6</sub>) δ 168.0, 138.3, 137.1, 127.9, 119.1, 27.6, 24.0, 15.8.

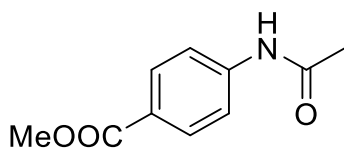

Methyl 4-acetamidobenzoate (**4o**)<sup>[16]</sup>: yield 80%, white solid, m.p. 113.5-114.2 °C; <sup>1</sup>H NMR (400 MHz, DMSO-*d*<sub>6</sub>) δ 10.22 (s, 1H), 7.84 (d, *J* = 8.8 Hz, 2H), 7.67 (d, *J* = 8.8 Hz, 2H), 3.76 (s, 3H), 2.04 (s, 3H). <sup>13</sup>C NMR (101 MHz, DMSO-*d*<sub>6</sub>) δ 168.9, 165.8, 143.7, 130.3, 123.7, 118.3, 51.8, 24.2.

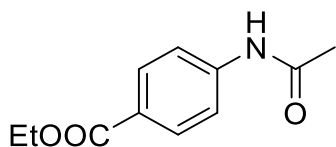

Ethyl 4-acetamidobenzoate (**4p**)<sup>[17]</sup>: yield 81%, white solid, m.p. 179.3-180.0 °C; <sup>1</sup>H NMR (400 MHz, DMSO-*d*<sub>6</sub>) δ 10.26 (s, 1H), 7.87 (d, *J* = 8.6 Hz, 2H), 7.68 (d, *J* = 8.6 Hz, 2H), 4.24 (q, *J* = 7.1 Hz, 2H), 2.05 (s, 3H), 1.27 (t, *J* = 7.1 Hz, 3H); <sup>13</sup>C NMR (101 MHz, DMSO-*d*<sub>6</sub>) δ 169.0, 165.9, 143.74, 130.3, 123.7, 118.3, 51.9, 24.2, 10.0.

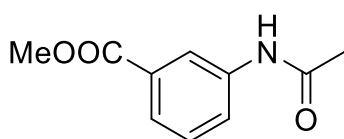

Methyl 3-acetamidobenzoate (**4q**)<sup>[18]</sup>: yield 82%, white solid, m.p. 131.7-132.6 °C; <sup>1</sup>H NMR (400

MHz, DMSO-*d*<sub>6</sub>)  $\delta$  <sup>1</sup>H NMR (400 MHz, DMSO-*d*<sub>6</sub>)  $\delta$  10.13 (s, 1H), 8.21 (s, 1H), 7.78 (d, *J* = 8.1 Hz, 1H), 7.58 (d, *J* = 7.7 Hz, 1H), 7.40 (t, *J* = 7.9 Hz, 1H), 3.81 (s, 3H), 2.02 (s, 3H). <sup>13</sup>C NMR (101 MHz, DMSO-*d*<sub>6</sub>)  $\delta$  168.7, 166.2, 139.7, 130.1, 128.2, 123.6, 123.4, 119.4, 52.2, 24.0.

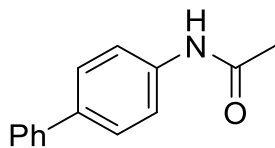

*N*-([1,1'-Biphenyl]-4-yl)acetamide (**4r**)<sup>[19]</sup>: yield 58%, white solid, m.p. 169.3-169.9 °C; <sup>1</sup>H NMR (400 MHz, DMSO-*d*<sub>6</sub>)  $\delta$  9.98 (s, 1H), 7.64 (d, *J* = 8.5 Hz, 2H), 7.56 (t, *J* = 8.0 Hz, 4H), 7.37 (t, *J* = 7.6 Hz, 2H), 7.25 (t, *J* = 7.3 Hz, 1H), 2.02 (s, 3H); <sup>13</sup>C NMR (101 MHz, DMSO-*d*<sub>6</sub>)  $\delta$  168.3, 139.8, 138.8, 134.6, 128.9, 126.9, 126.9, 126.2, 119.3, 24.0.

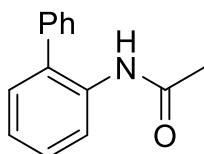

*N*-([1,1'-Biphenyl]-2-yl)acetamide (**4s**)<sup>[20]</sup>: yield 55%, white solid, m.p. 119.4-120.1 °C; <sup>1</sup>H NMR (101 MHz, DMSO-*d*<sub>6</sub>)  $\delta$  9.22 (s, 1H), 7.48-7.20 (m, 9H), 1.87 (s, 3H); <sup>13</sup>C NMR (400 MHz, DMSO-*d*<sub>6</sub>)  $\delta$  168.7, 139.0, 136.7, 134.9, 130.2, 128.7, 128.4, 127.6, 127.4, 127.2, 126.0, 23.0.

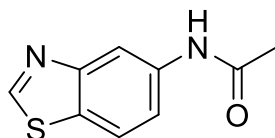

*N*-(Benzo[d]thiazol-5-yl)acetamide (**4t**)<sup>[21]</sup>: yield 73%, white solid, m.p. 192.0-192.4 °C; <sup>1</sup>H NMR (400 MHz, DMSO-*d*<sub>6</sub>)  $\delta$  10.08 (s, 1H), 9.25 (s, 1H), 8.40 (d, *J* = 1.8 Hz, 1H), 7.93 (d, *J* = 8.7 Hz, 1H), 7.50 (dd, *J* = 8.7, 1.9 Hz, 1H), 2.00 (s, 3H); <sup>13</sup>C NMR (101 MHz, DMSO-*d*<sub>6</sub>)  $\delta$  168.6, 156.8, 153.6, 138.0, 127.7, 122.2, 117.9, 112.6, 24.1.

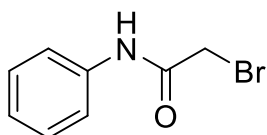

2-Bromo-*N*-phenylacetamide (**4u**)<sup>[22]</sup>: yield 59%, white solid, m.p. 127.4-128.0 °C; <sup>1</sup>H NMR (400 MHz, DMSO)  $\delta$  10.34 (s, 1H), 7.54 (d, *J* = 7.9 Hz, 2H), 7.28 (t, *J* = 7.9 Hz, 2H), 7.03 (t, *J* = 7.4 Hz, 1H), 3.99 (s, 2H); <sup>13</sup>C NMR (400 MHz, DMSO)  $\delta$  164.8, 138.6, 128.9, 123.9, 119.2, 30.5.

#### 4. References

- [1] A. D. Wong, T. M. Güngör, E. R. Gillies, *ACS Macro Lett.* **2014**, *3*, 1191-1195.
- [2] A. Bordoloi, S. Halligudi, *Adv. Synth. Catal.* **2007**, *349*, 2085-2088.
- [3] C. L. Hammill, B. B. Noble, P. L. Norcott, S. Ciampi and M. L. Coote, *J. Phys. Chem. C*, **2019**, *123*, 5273-5281.
- [4] B. H. Kim, Y. M. Jun, S. W. Suh, W. Baik and B. M. Lee, *J. Chem. Res. (S)* **1998**, 46-47.
- [5] B. H. Kim, J. W. Cheong, R. Han, Y. M. Jun, W. Baik and B. M. Lee, *Synth. Commun.* **2006**, *31*, 3577-3586.
- [6] J. H. Wagenknecht and G. V. Johnson, *J. Electrochem. Soc.* **1987**, *134*, 2754-2761.
- [7] Y. Peng, H. Liu, M. Tang, L. Cai and V. Pike, *Chin. J. Chem.* **2009**, *27*, 1339-1344.

- [8] B. T. Gowda, K. M. Usha and K. L. Jayalakshmi, *Z. Naturforsch.* **2003**, *58*, 801-806.
- [9] S. Das Sharma, P. Gogoi, M. Boruah and D. Konwar, *Synth. Commun.* **2007**, *37*, 2473-2481.
- [10] J.-M. Chretien, F. Zammattio, E. Le Grogneec, M. Paris, B. Cahingt, G. Montavon and J.-P. Quintard, *J. Org. Chem.* **2005**, *70*, 2870-2873.
- [11] G. K. S. Prakash, M. D. Moran, T. Mathew and G. A. Olah, *J. Fluor. Chem.* **2009**, *130*, 806-809.
- [12] W. Deng, C. Zhang, M. Liu, Y. Zou, L. Liu and Q.-X. Guo, *Chin. J. Chem.* **2005**, *23*, 1241-1246.
- [13] H. Morimoto, T. Tsubogo, N. D. Litvinas and J. F. Hartwig, *Angew. Chem. Int. Ed.* **2011**, *50*, 3793-3798.
- [14] Shilpa and B. T. Gowda, *Z. Naturforsch. A: Phys. Sci.* **2007**, *62*, 84-90.
- [15] R. Saez, M. D. Otero, B. Batanero and F. Barba, *J. Chem. Res.* **2008**, *9*, 492-494.
- [16] D. R. Stuart, M. Bertrand-Laperle, K. M. N. Burgess and K. Fagnou, *J. Am. Chem. Soc.* **2008**, *130*, 16474-16475.
- [17] Z. Yao and X. Wei, *Chin. J. Chem.* **2010**, *28*, 2260-2268.
- [18] R. J. Rahaim, Jr. and R. E. Maleczka, Jr., *Synthesis* **2006**, *19*, 3316-3340.
- [19] L. Bai and J.-X. Wang, *Adv. Synth. Catal.* **2008**, *350*, 315-320.
- [20] B. S. Kim, C. Jang, D. J. Lee and S. W. Youn, *Chem. - Asian J.* **2010**, *5*, 2336-2340.
- [21] P. Petitcolas, R. Sureau, J. Frenkiel and R. Goupil, *Bull. Soc. Chim. Fr.* **1949**, 103-112.
- [22] S. J. Ratnakar, M. Woods, A. J. M. Lubag, Z. Kovács and A. D. Sherry, *J. Am. Chem. Soc.* **2008**, *130*, 6-7.

## 5. NMR Spectra

$^1\text{H}$  NMR of **6a**

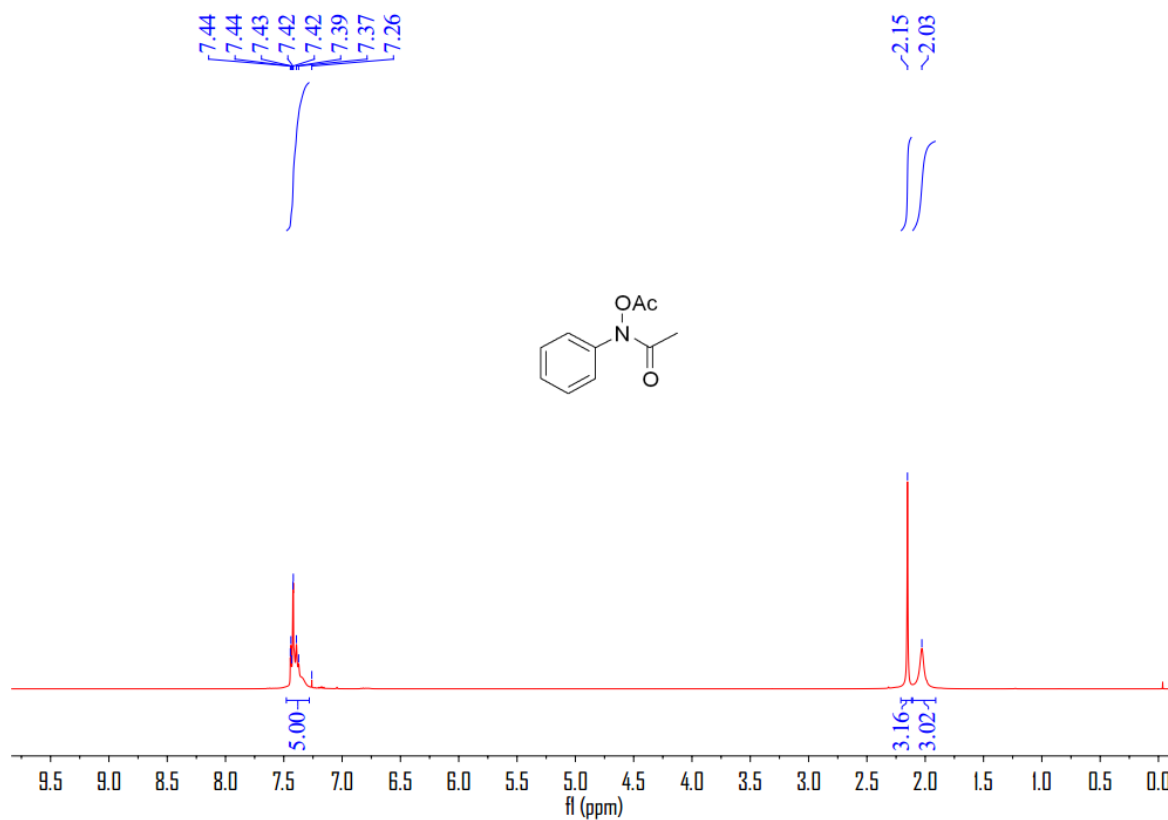

$^{13}\text{C}$  NMR of **6a**

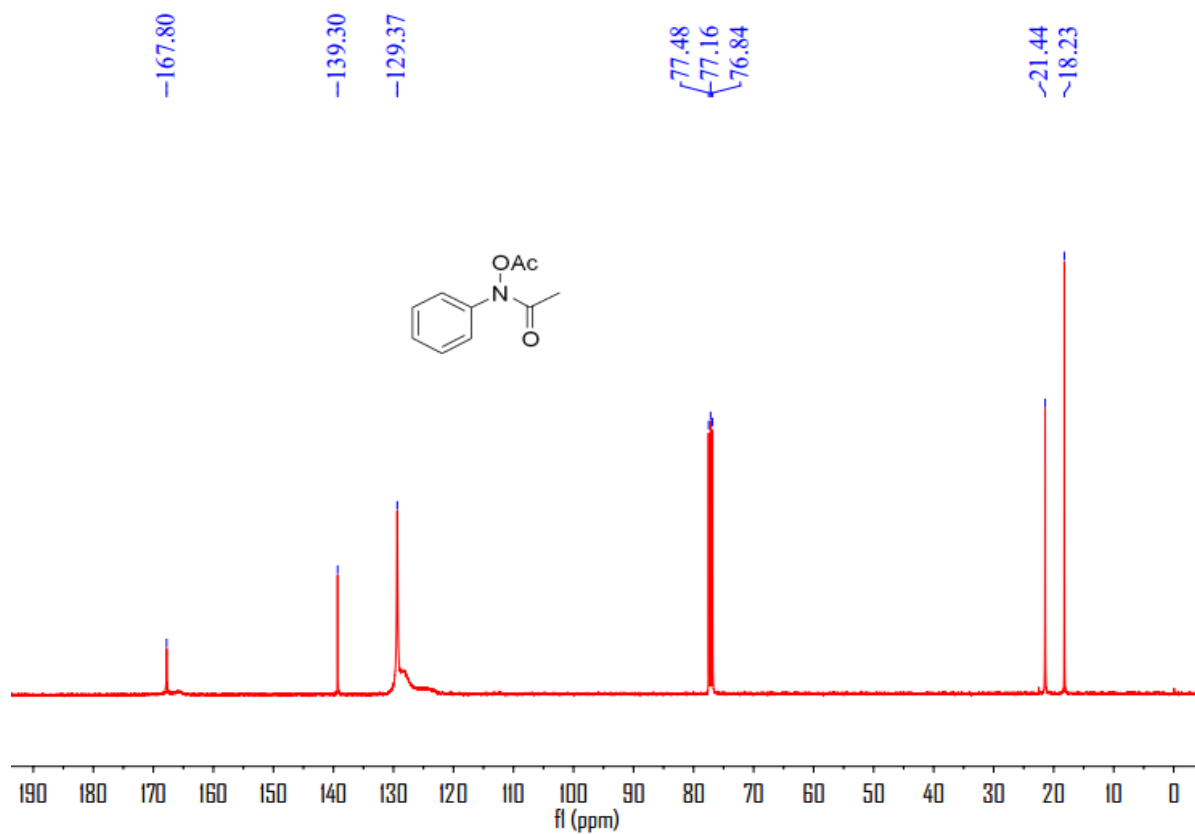

<sup>1</sup>H NMR of **6b**

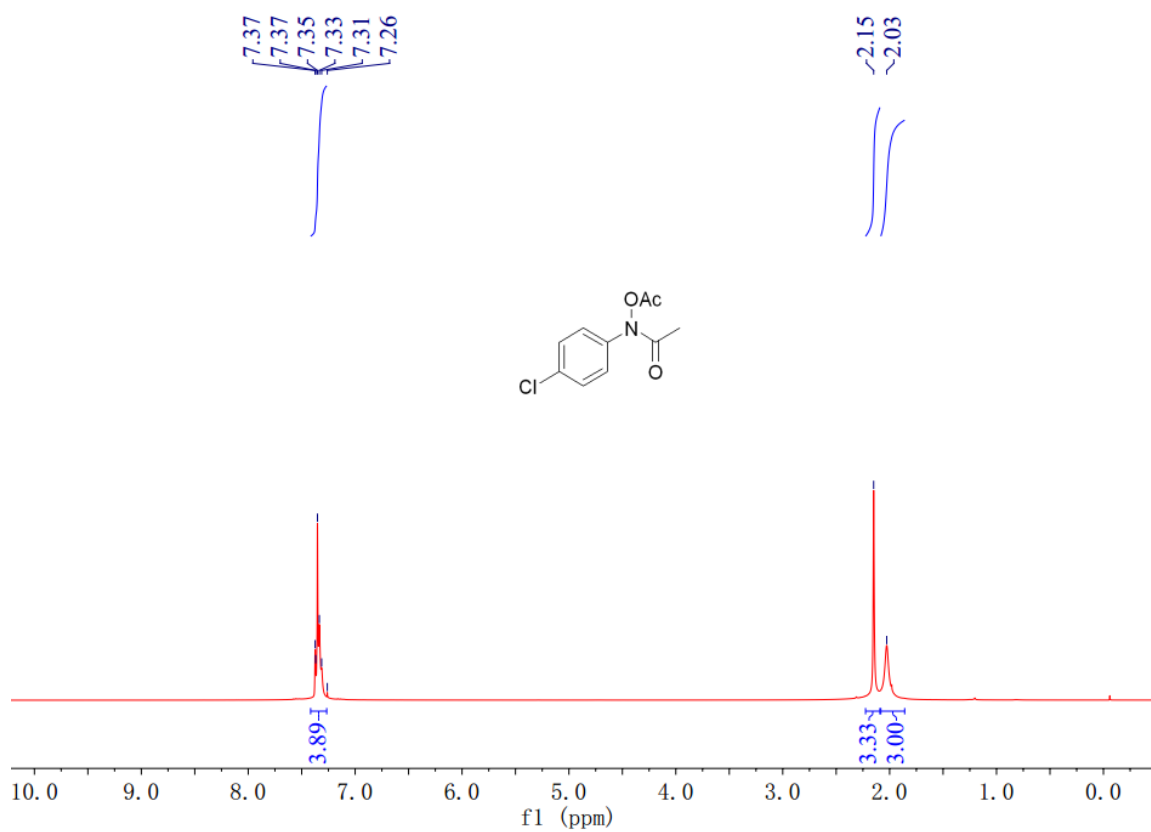

<sup>13</sup>C NMR of **6b**

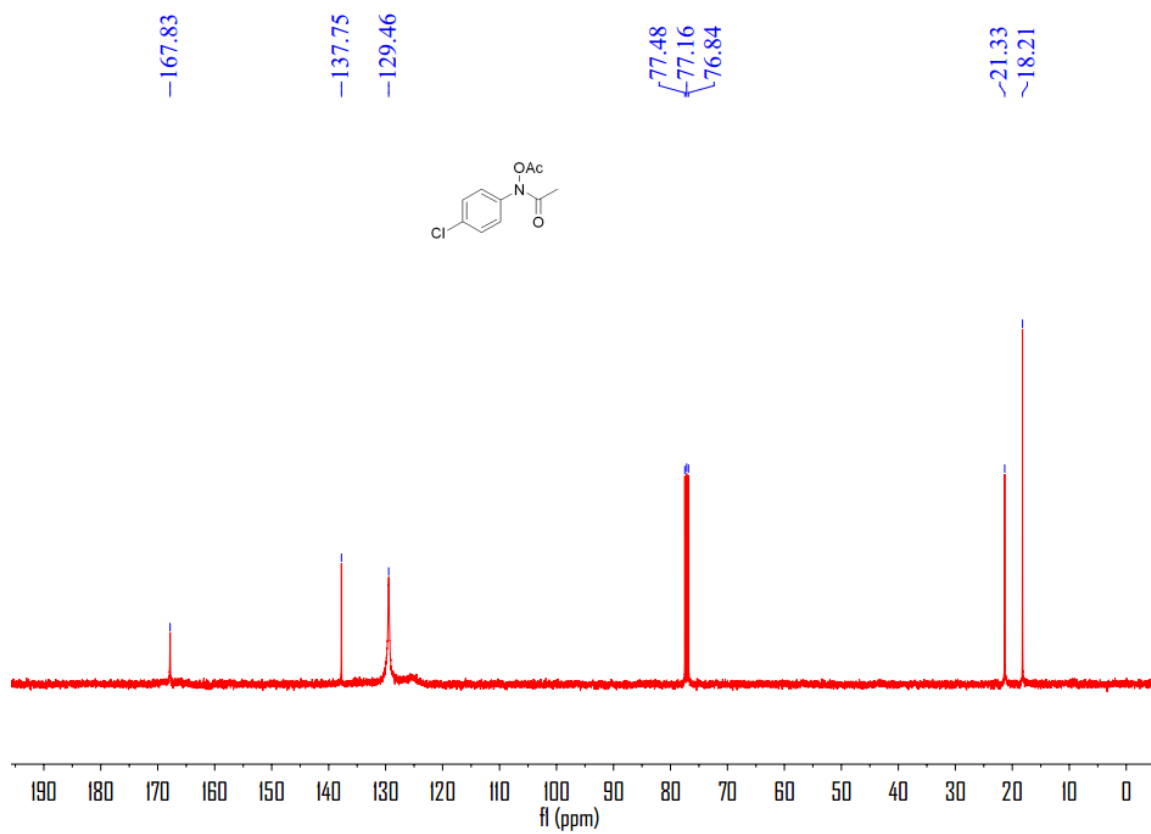

<sup>1</sup>H NMR of **6c**

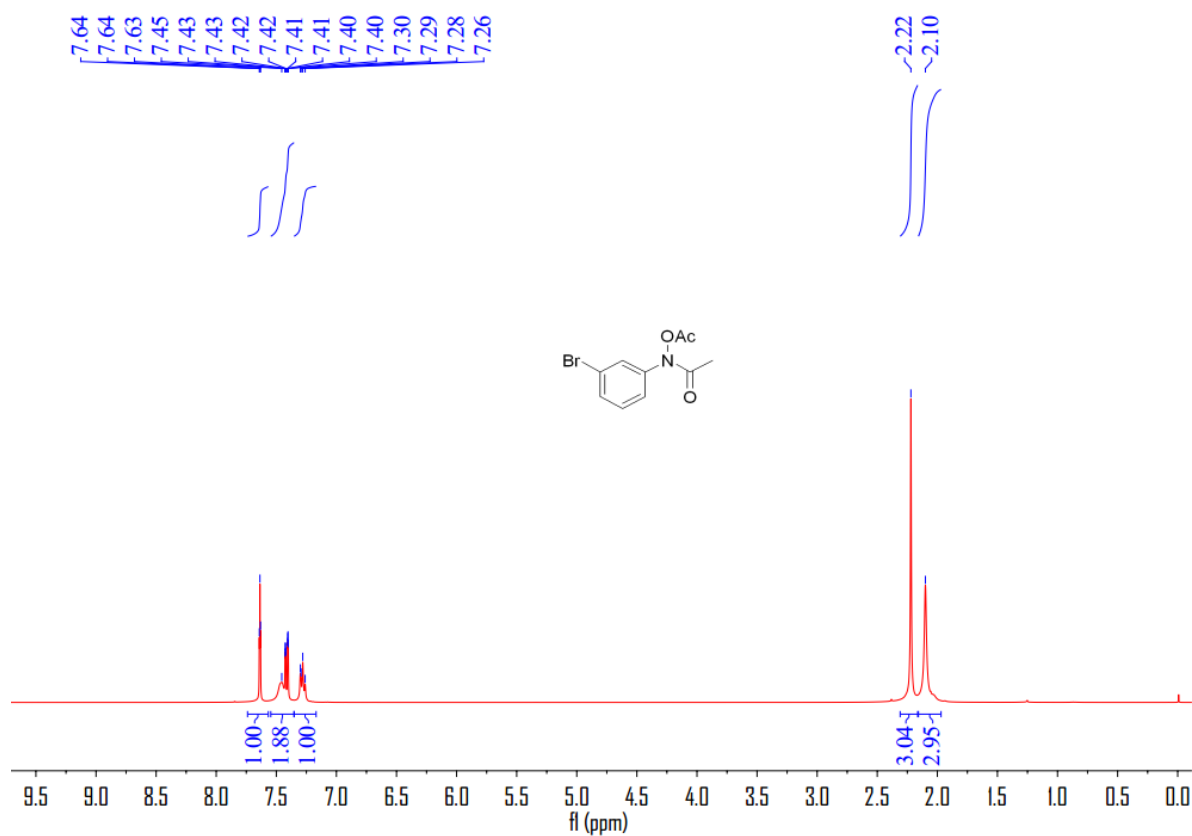

<sup>13</sup>C NMR of **6c**

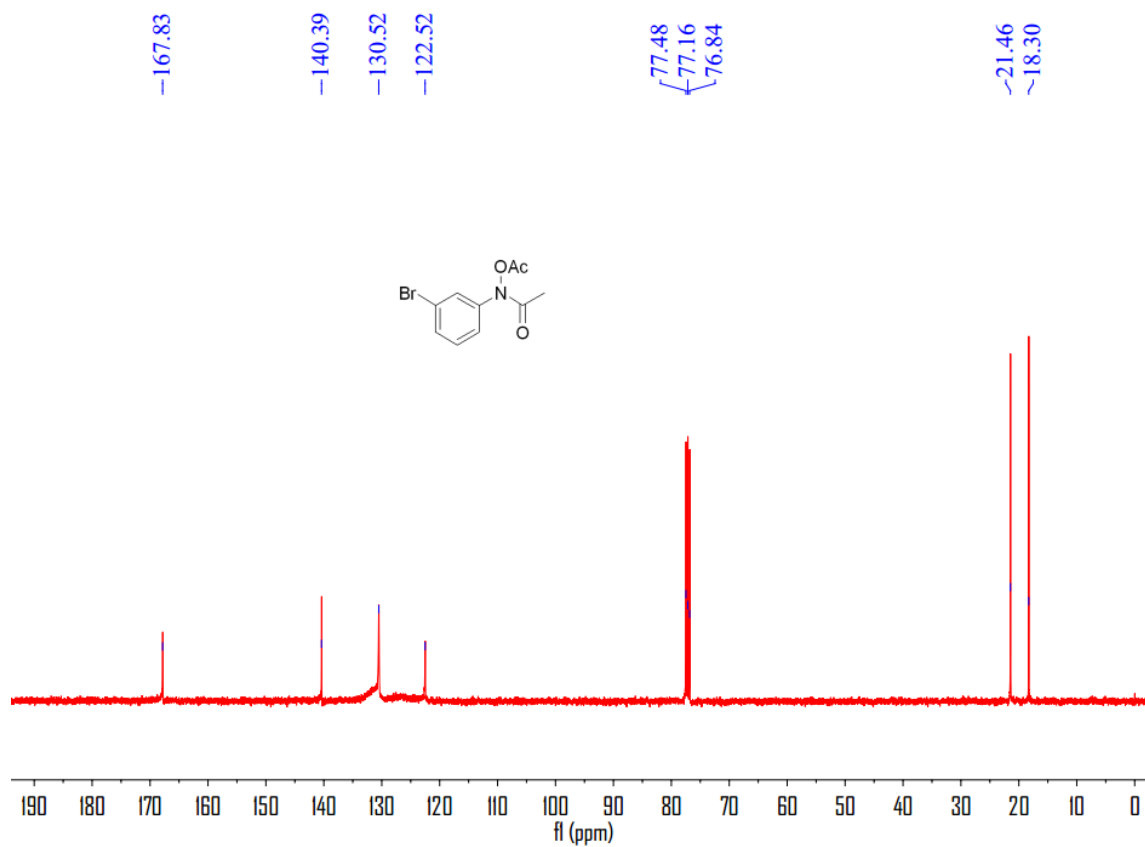

<sup>1</sup>H NMR of **6d**

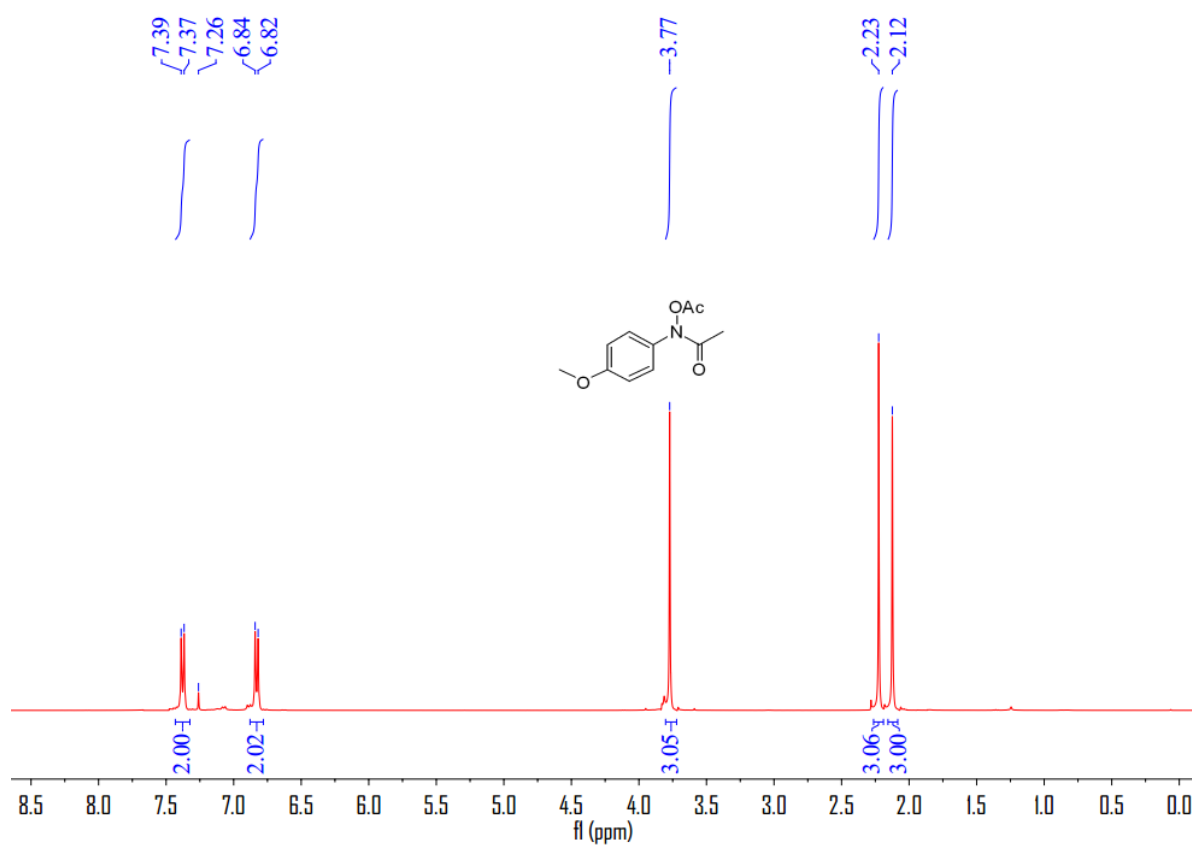

<sup>13</sup>C NMR of **6d**

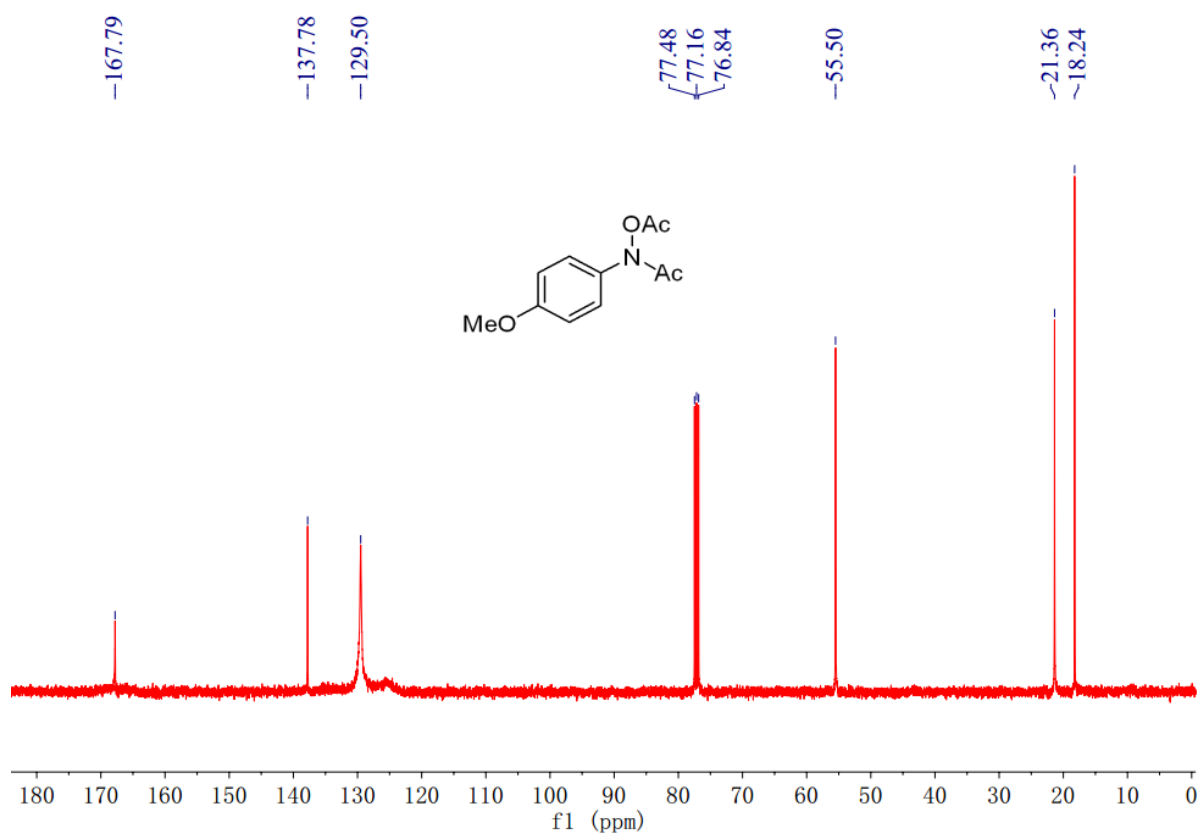



<sup>1</sup>H NMR of **6e**

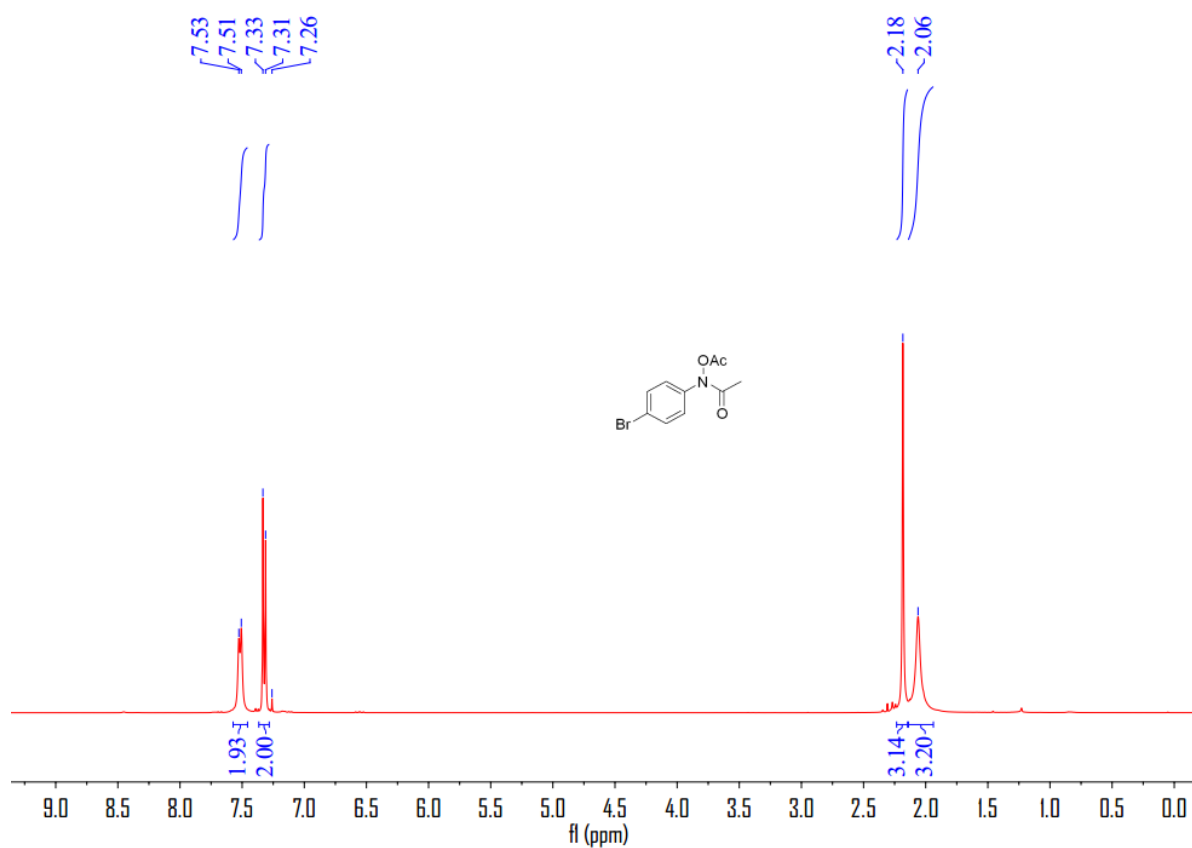

<sup>13</sup>C NMR of **6e**

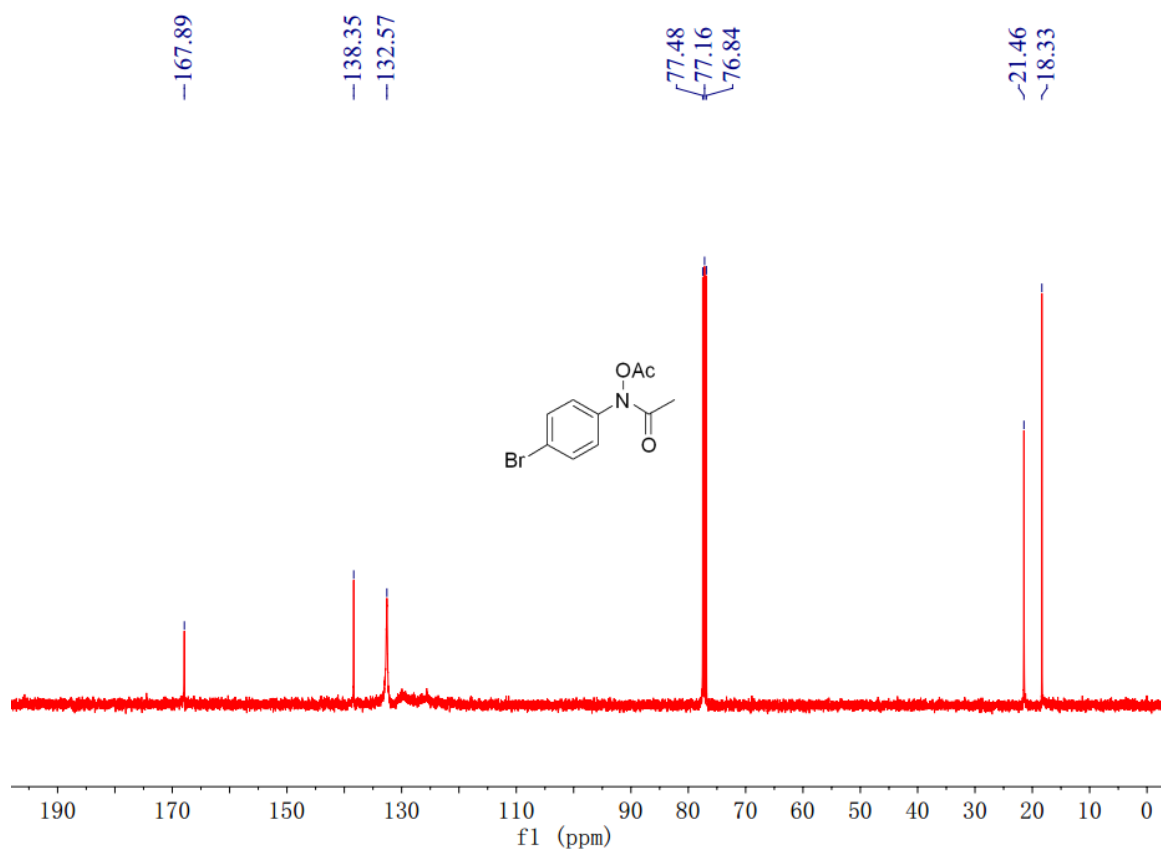

<sup>1</sup>H NMR of **6f**

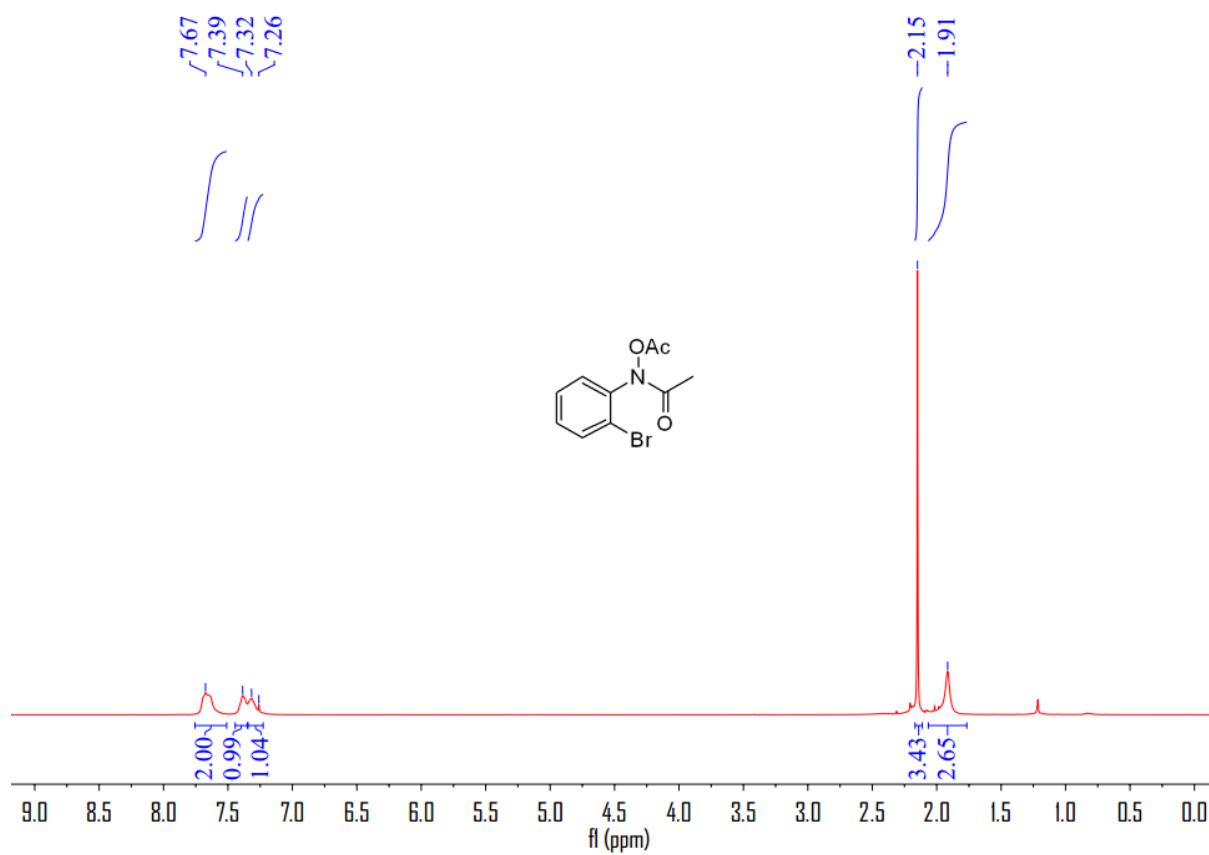

<sup>13</sup>C NMR of **6f**

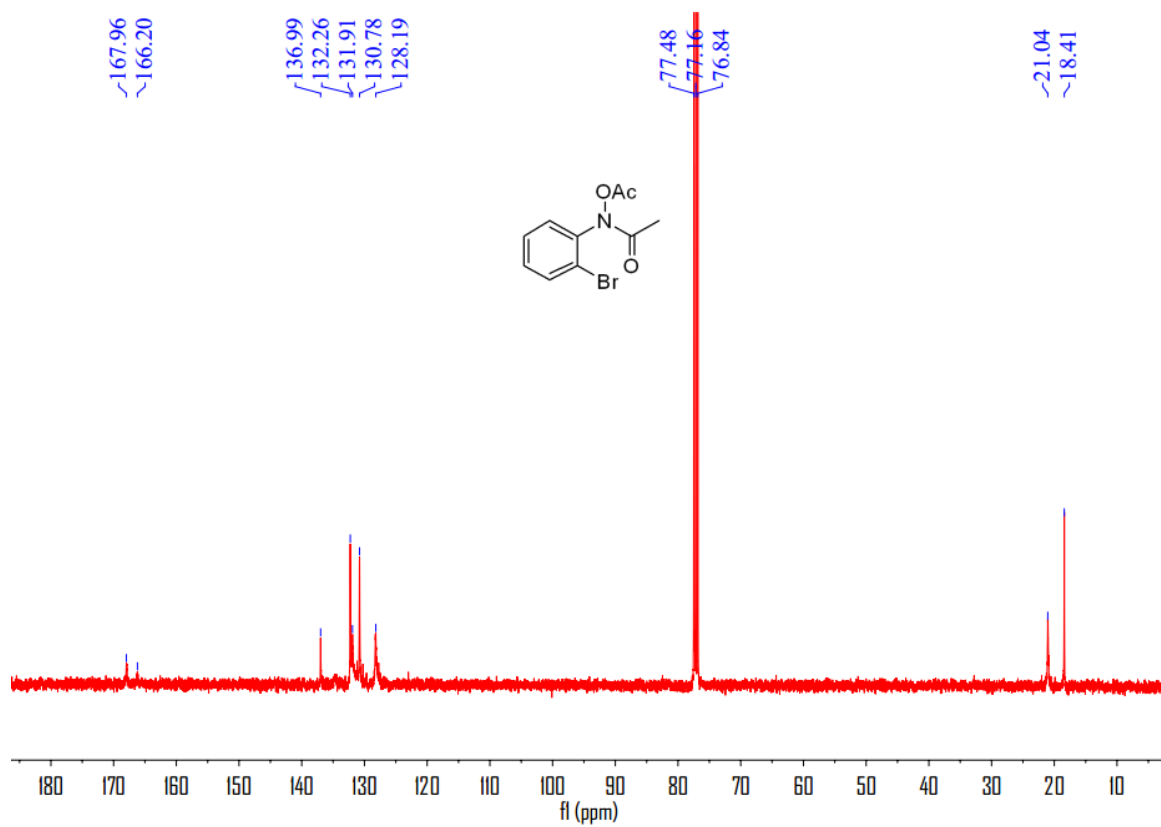

<sup>1</sup>H NMR of **6g**

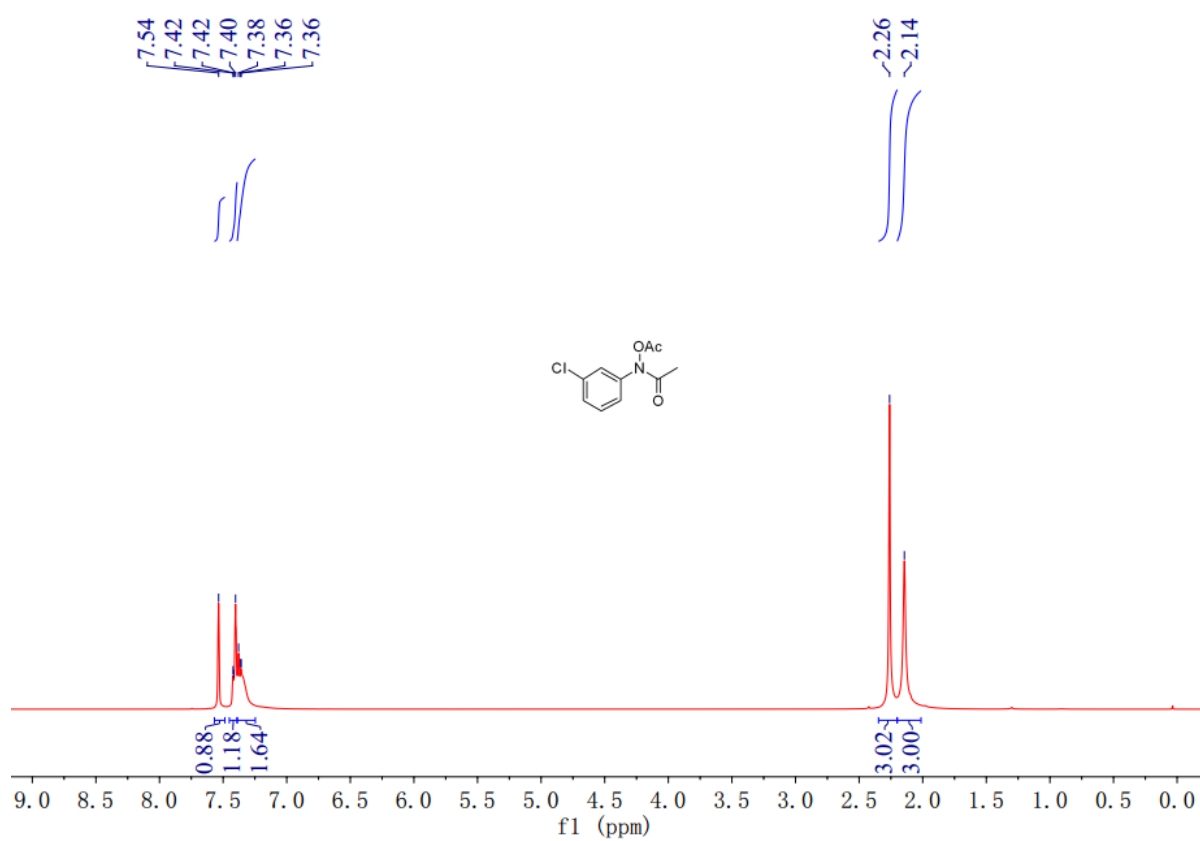

<sup>13</sup>C NMR of **6g**

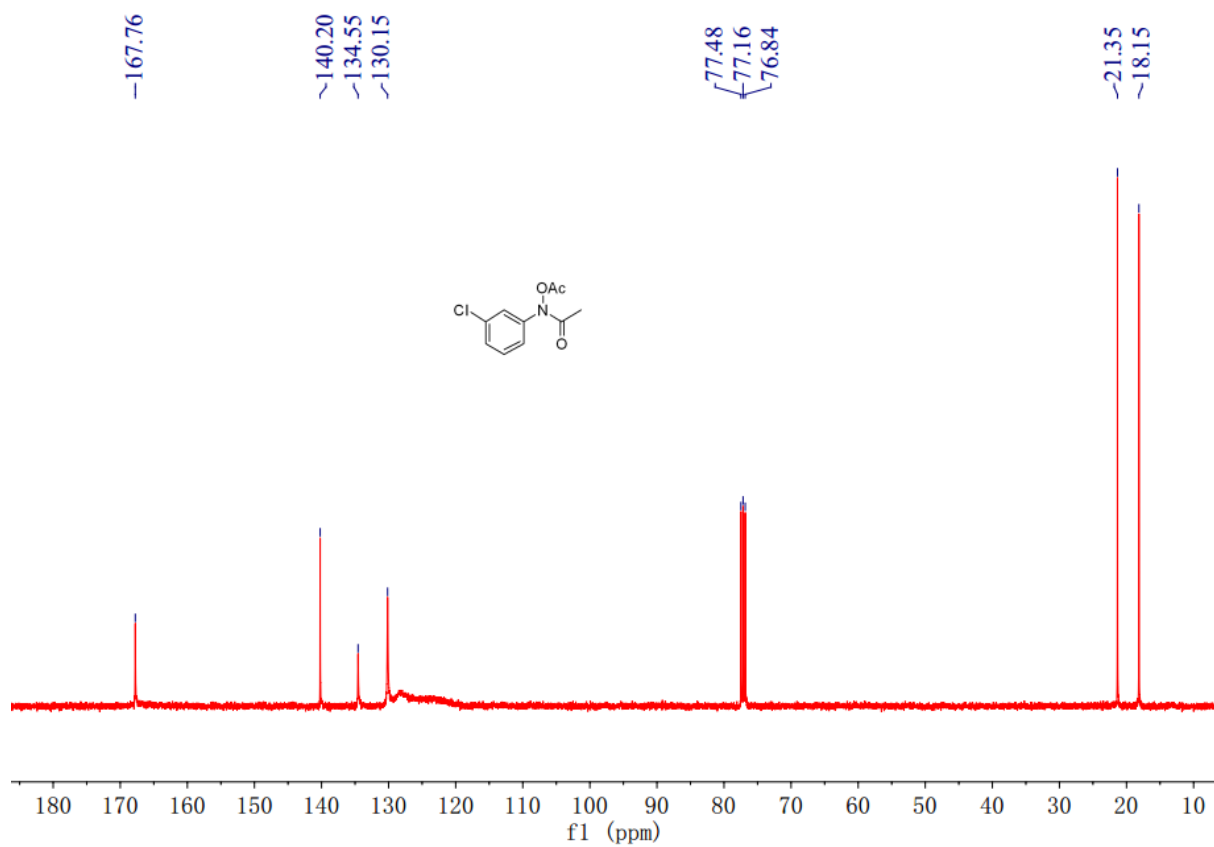

<sup>1</sup>H NMR of **6h**

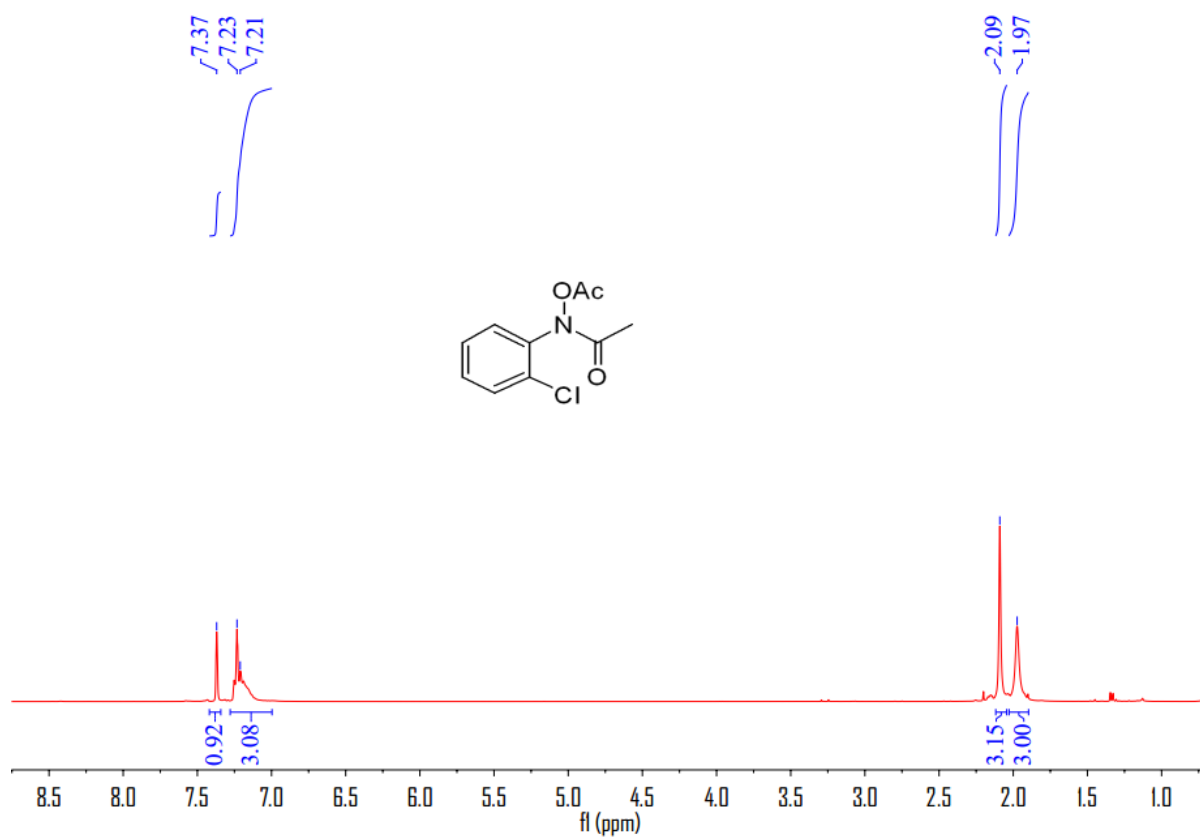

<sup>13</sup>C NMR of **6h**

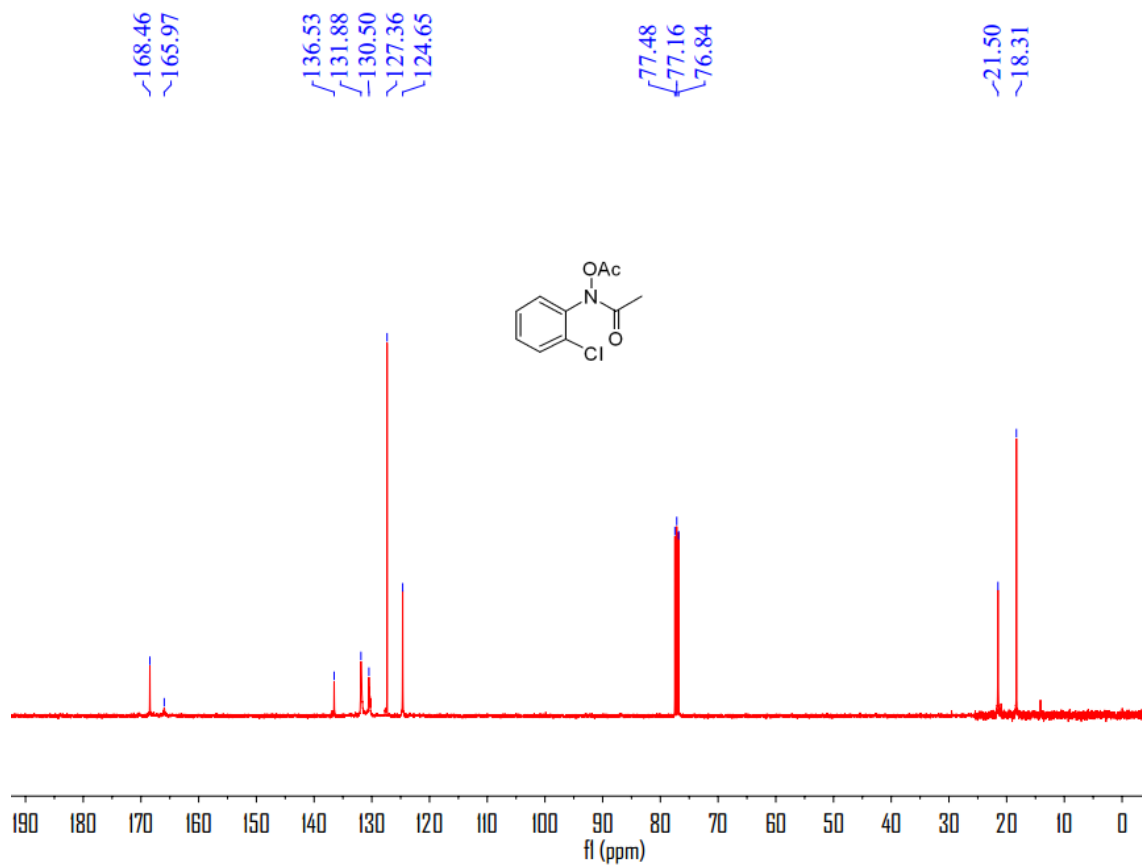

<sup>1</sup>H NMR of **6i**

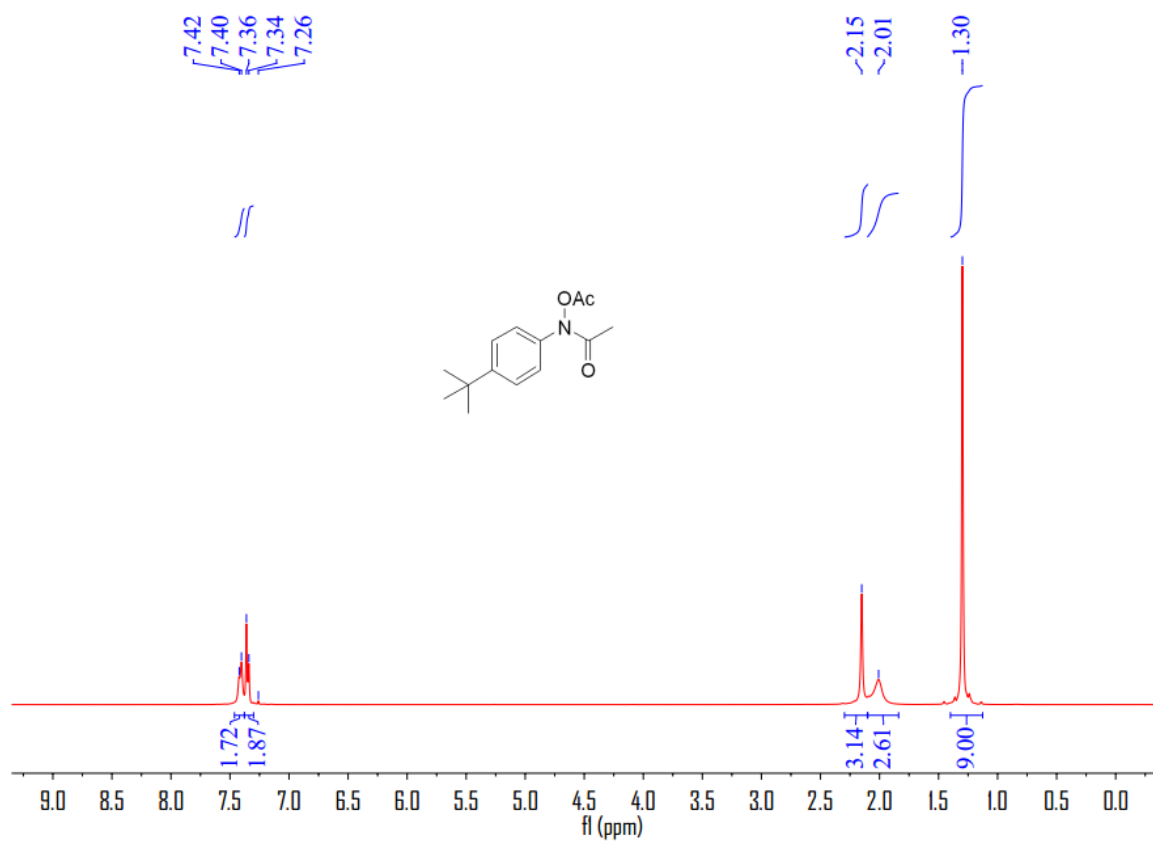

<sup>13</sup>C NMR of **6i**

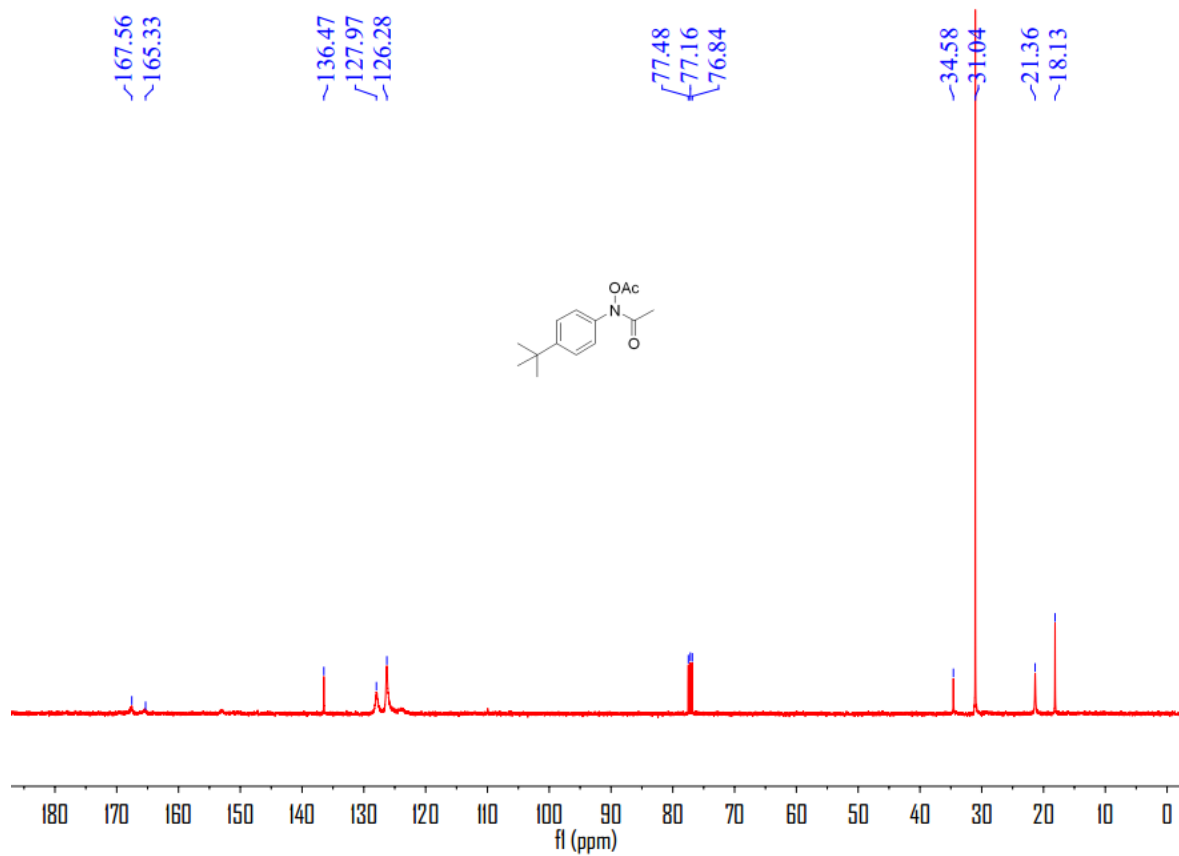

<sup>1</sup>H NMR of **6j**

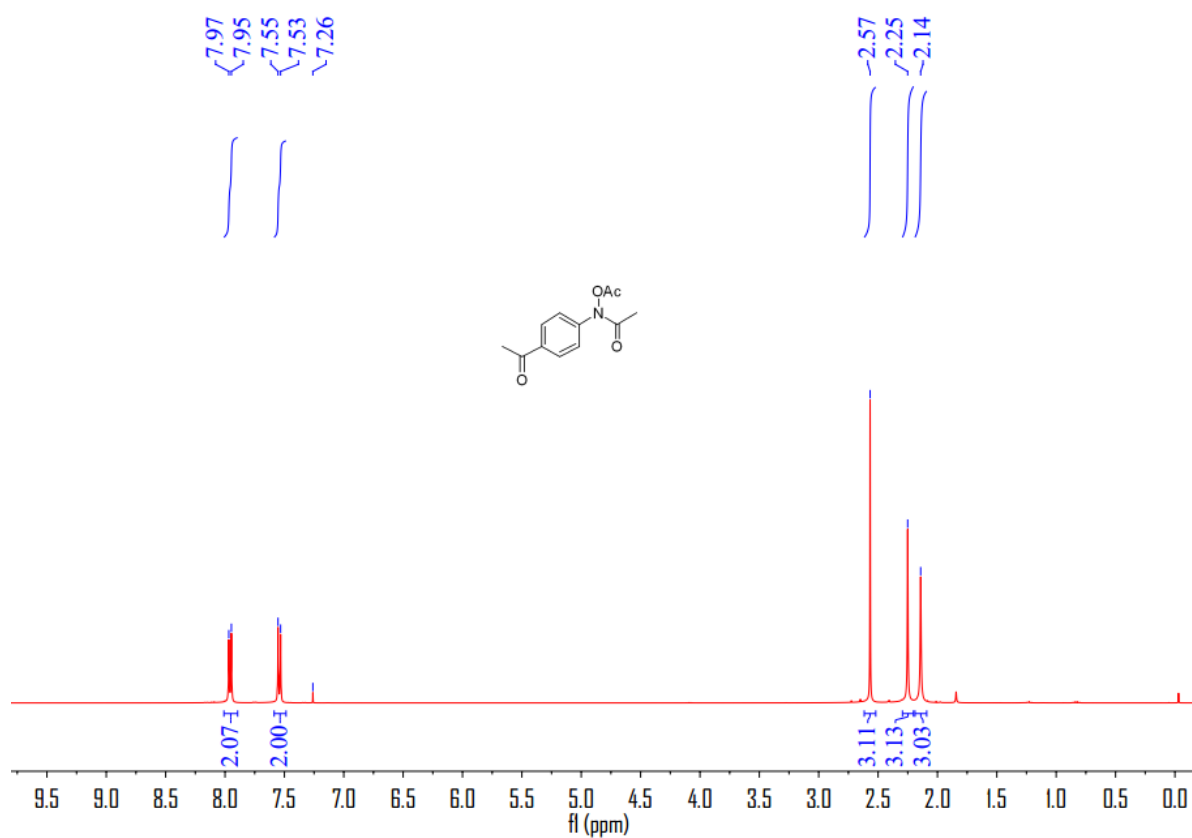

<sup>13</sup>C NMR of **6j**

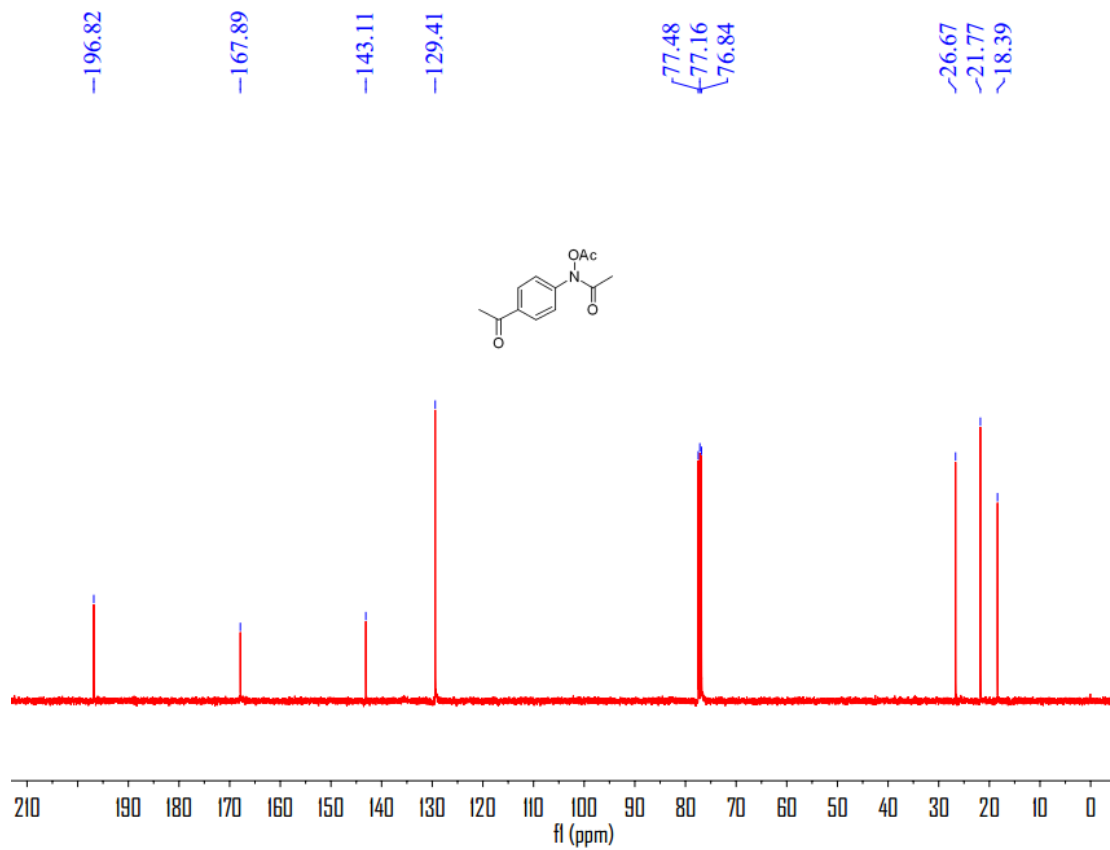

<sup>1</sup>H NMR of **6k**

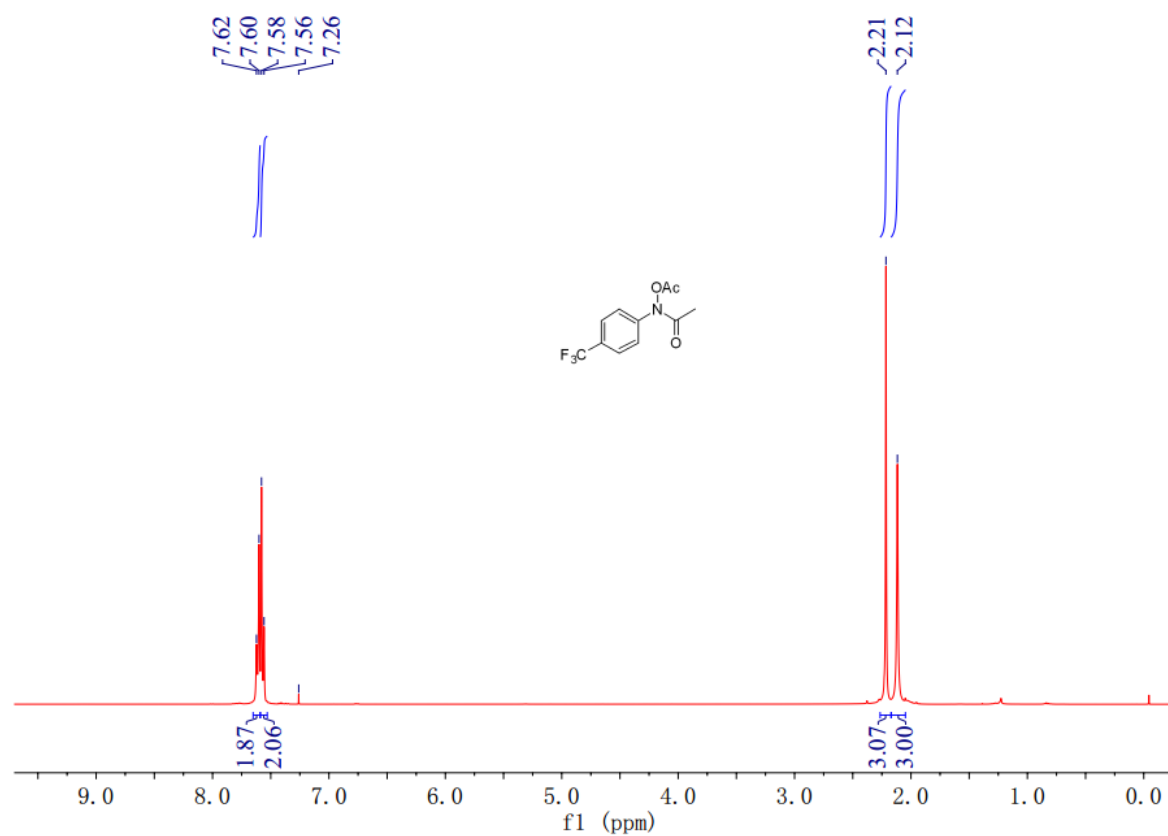

<sup>13</sup>C NMR of **6k**

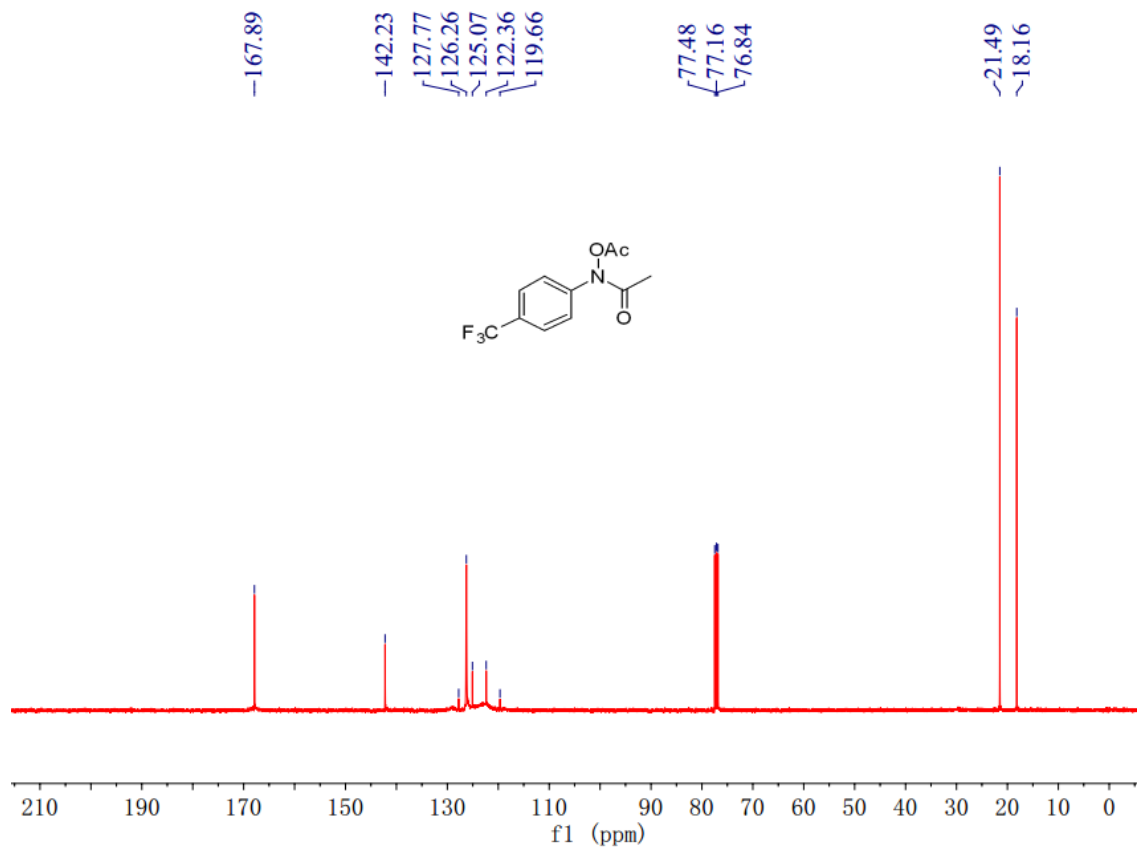

$^{19}\text{F}$  NMR of **6k**

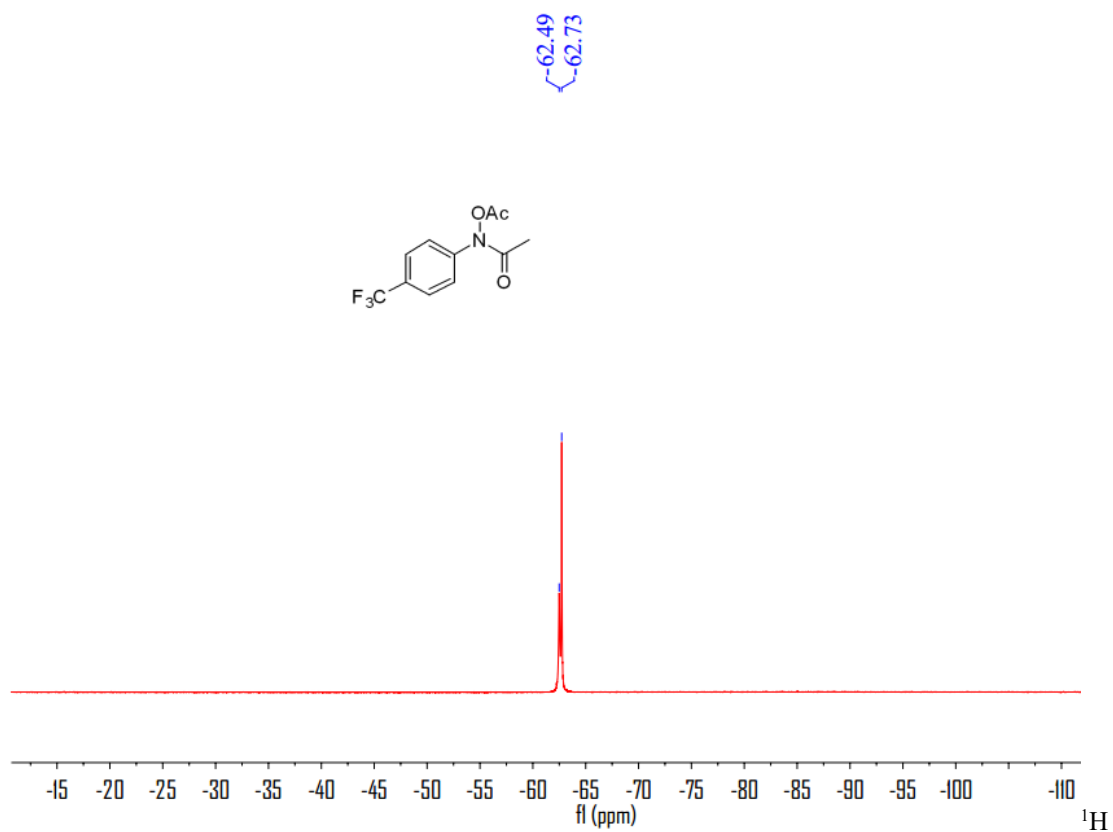

$^1\text{H}$  NMR of **6l**

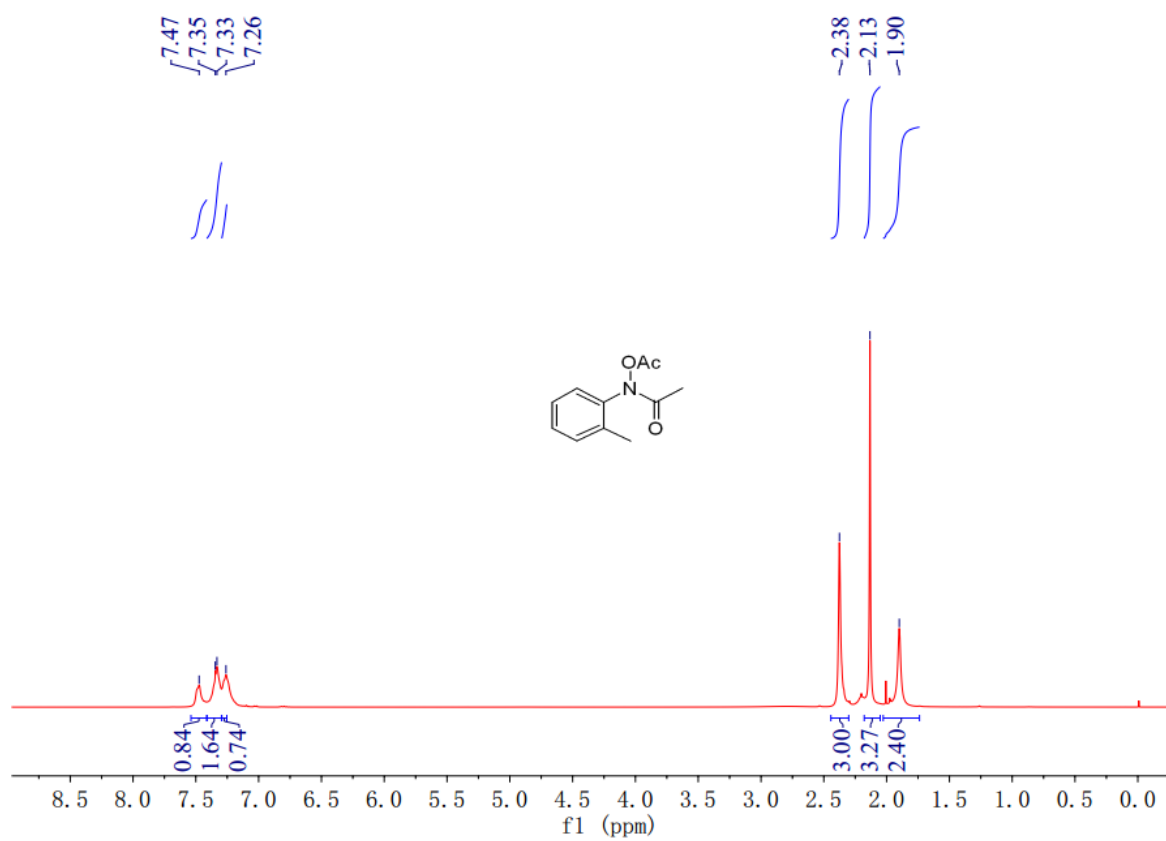



<sup>13</sup>C NMR of **6l**

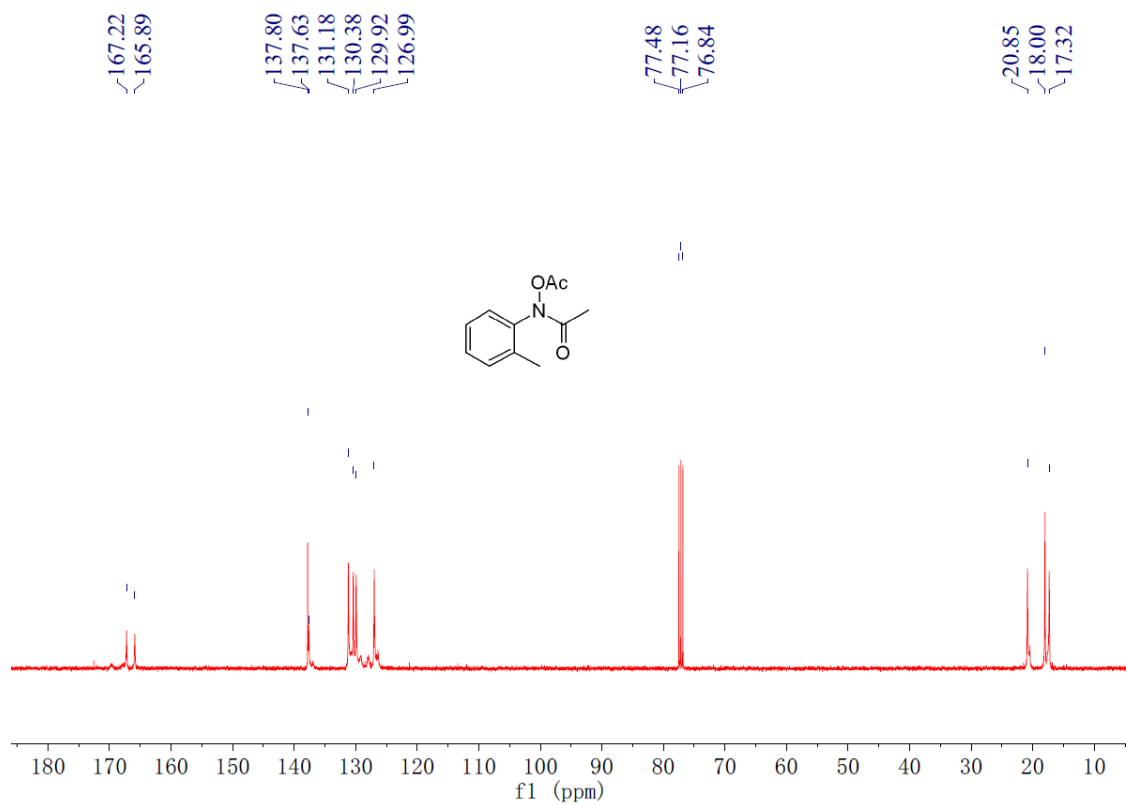

<sup>1</sup>H NMR of **6m**

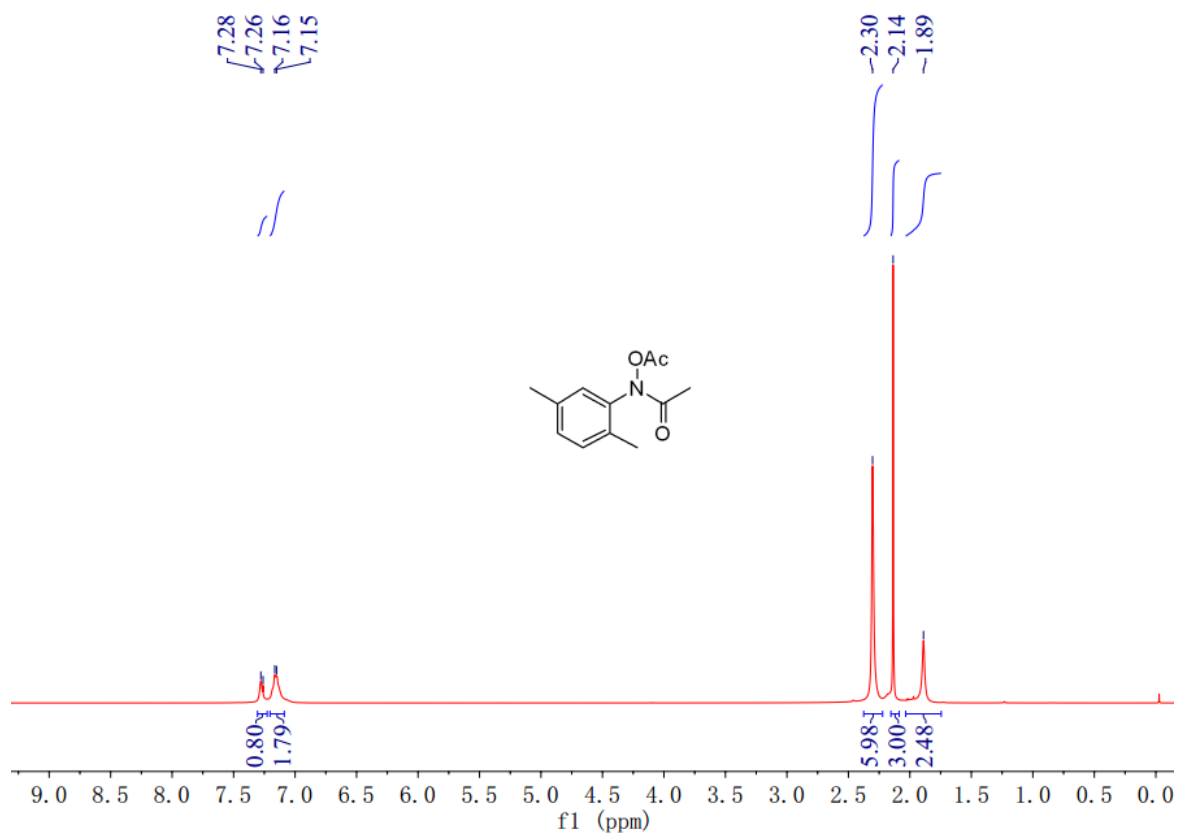

<sup>13</sup>C NMR of **6m**

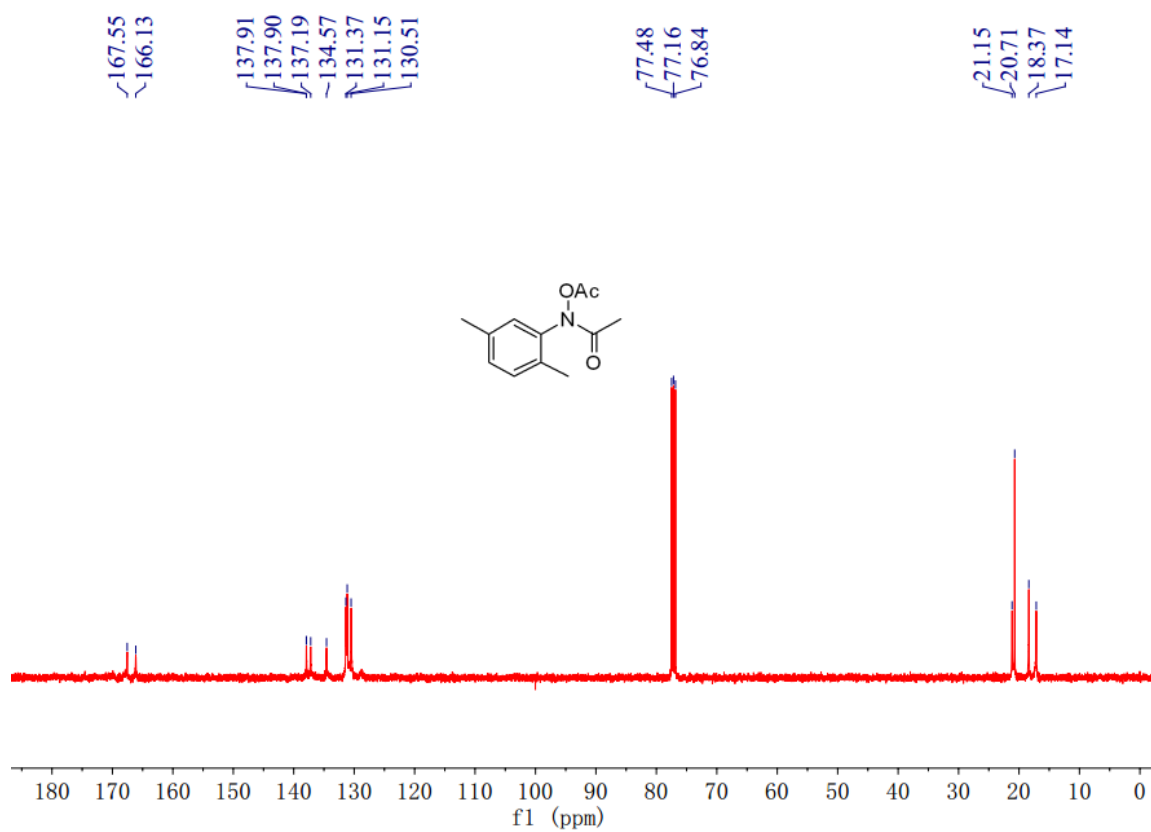

<sup>1</sup>H NMR of **6n**

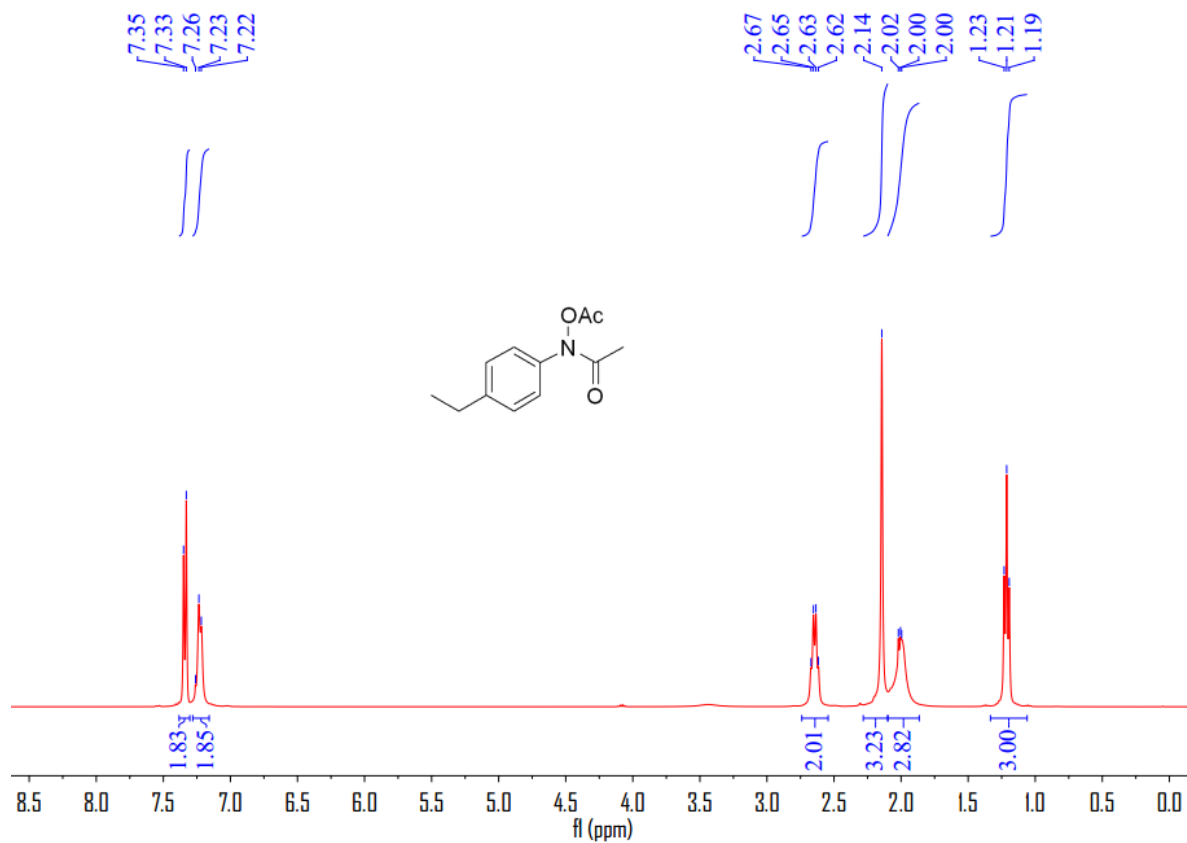

<sup>13</sup>C NMR of **6n**

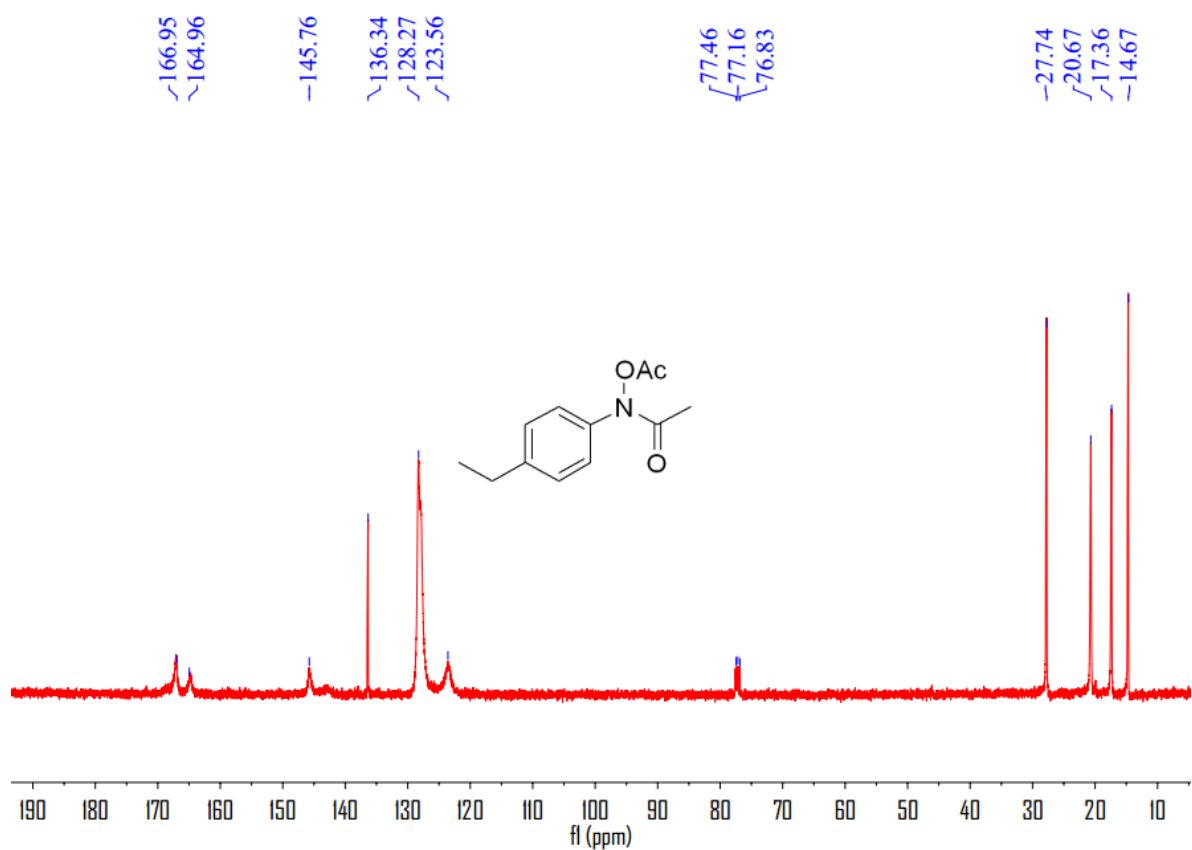

<sup>1</sup>H NMR of **6o**

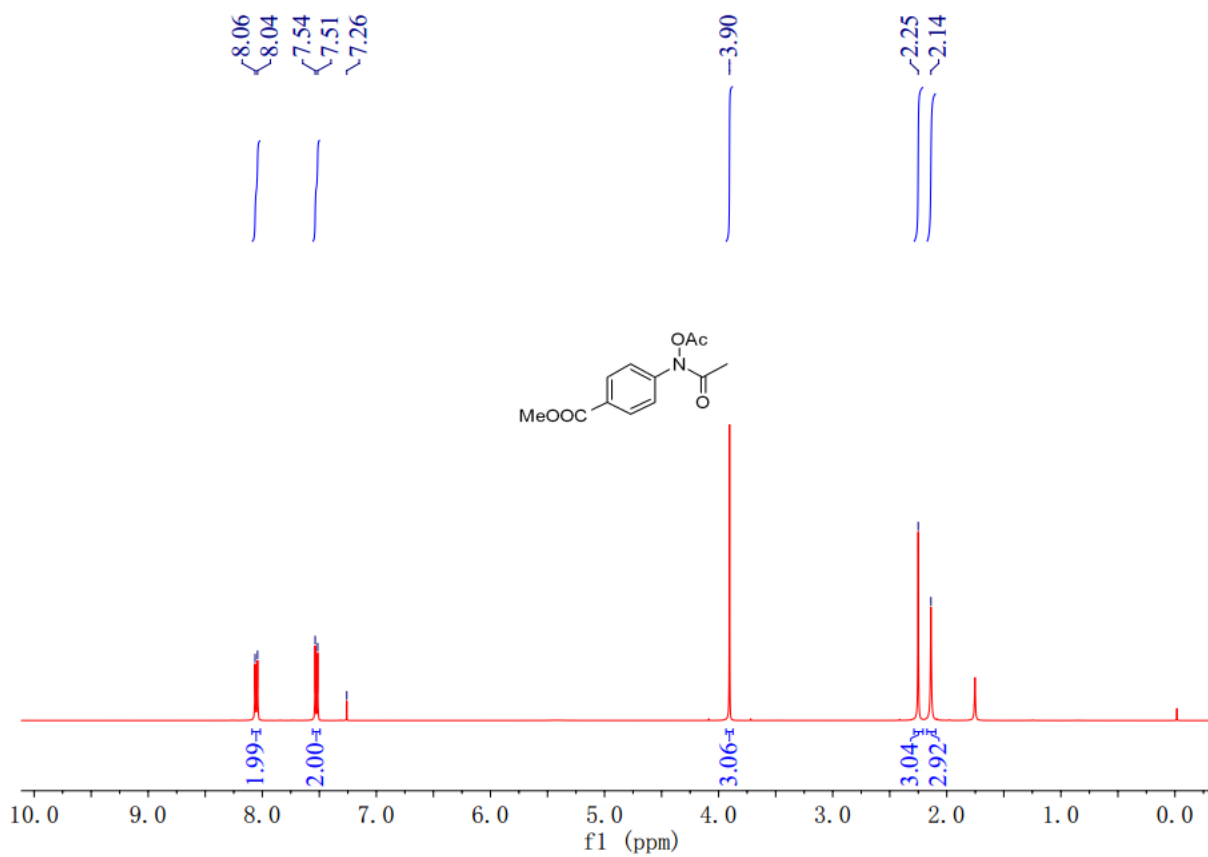

<sup>13</sup>C NMR of **6o**

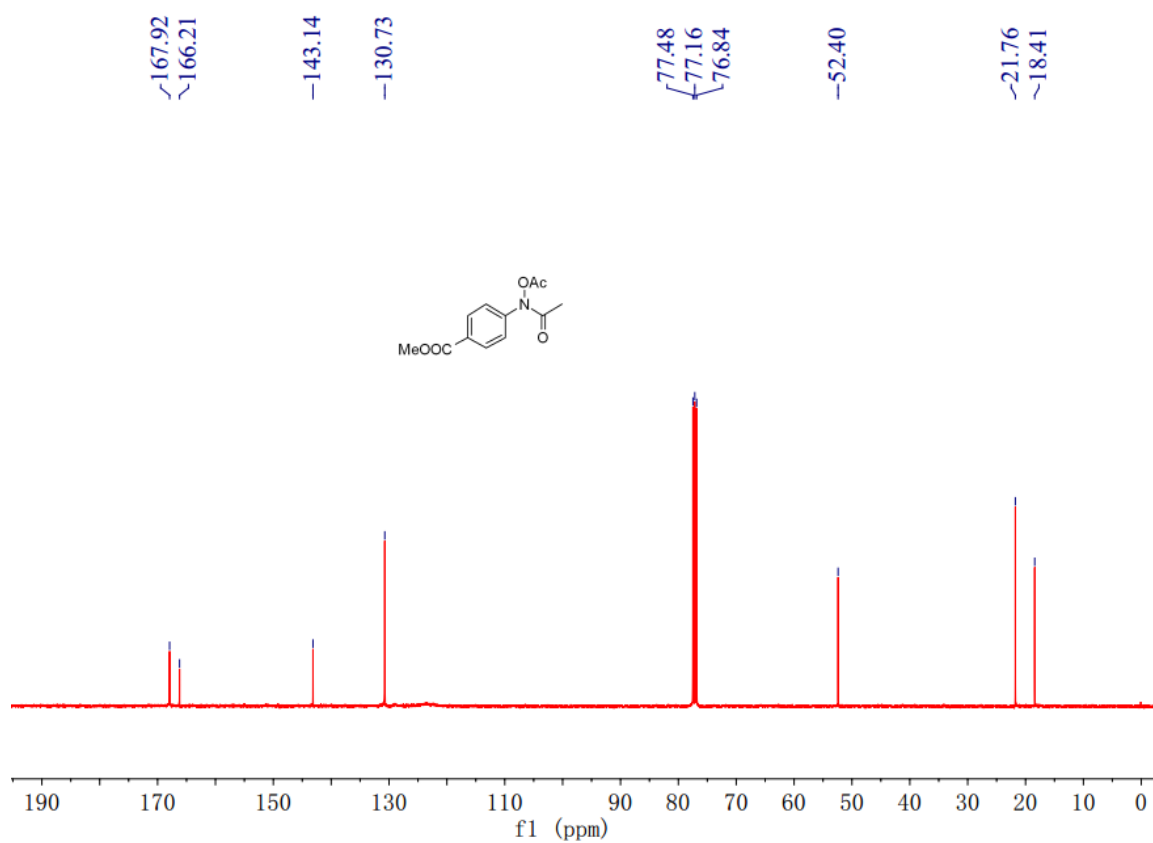

<sup>1</sup>H NMR of **6p**

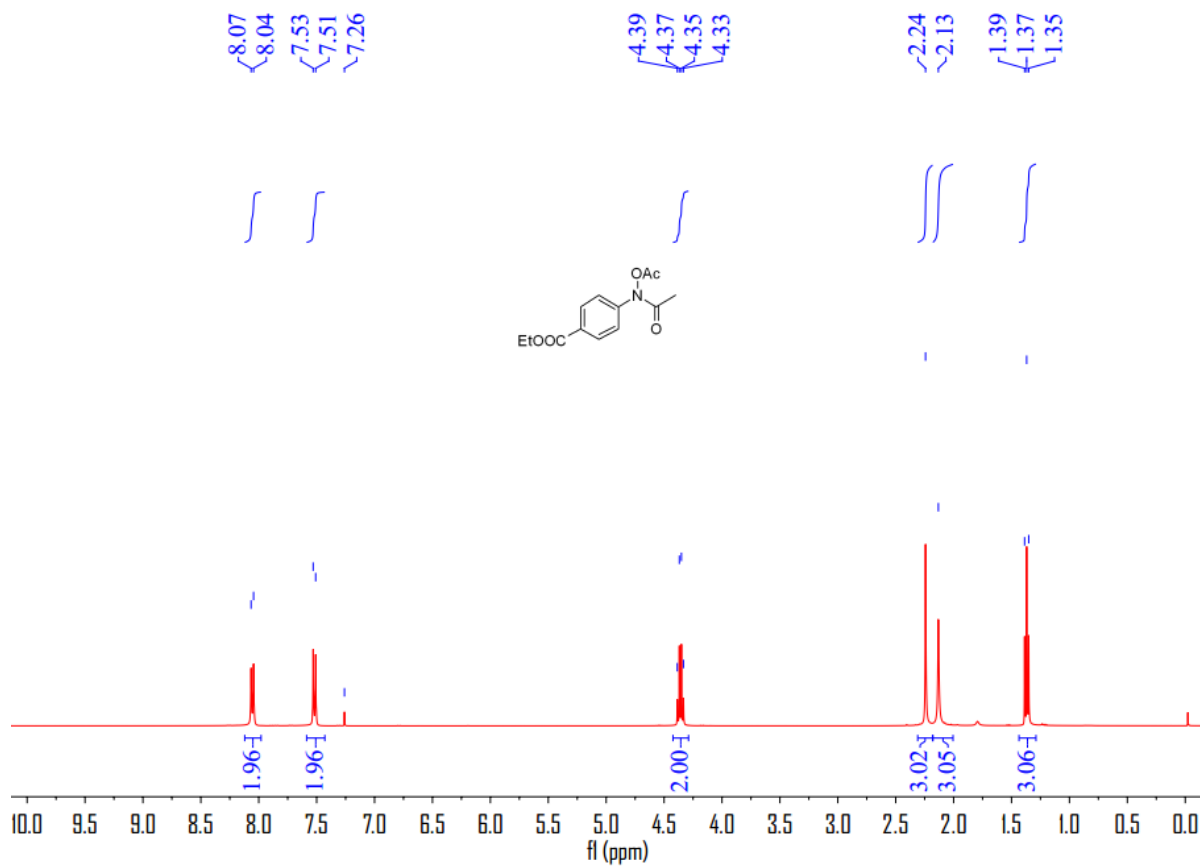

<sup>13</sup>C NMR of **6p**

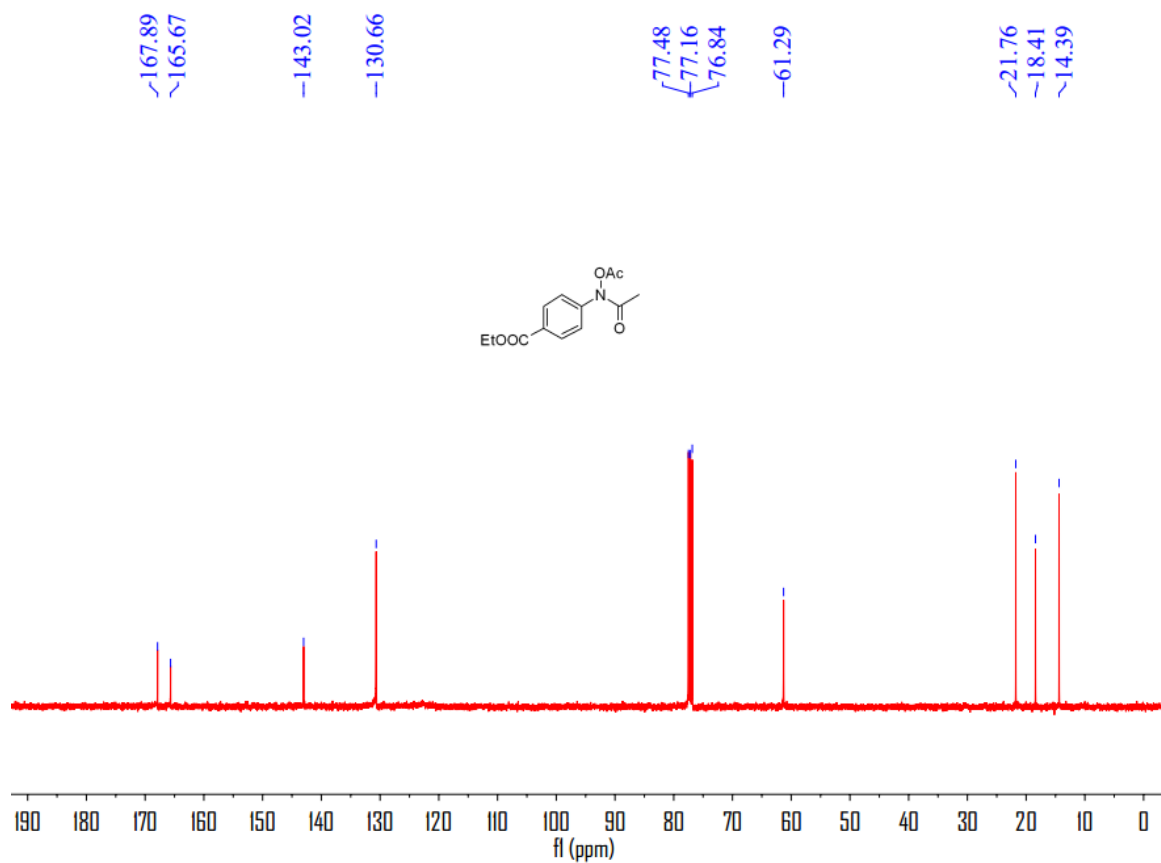

<sup>1</sup>H NMR of **6q**

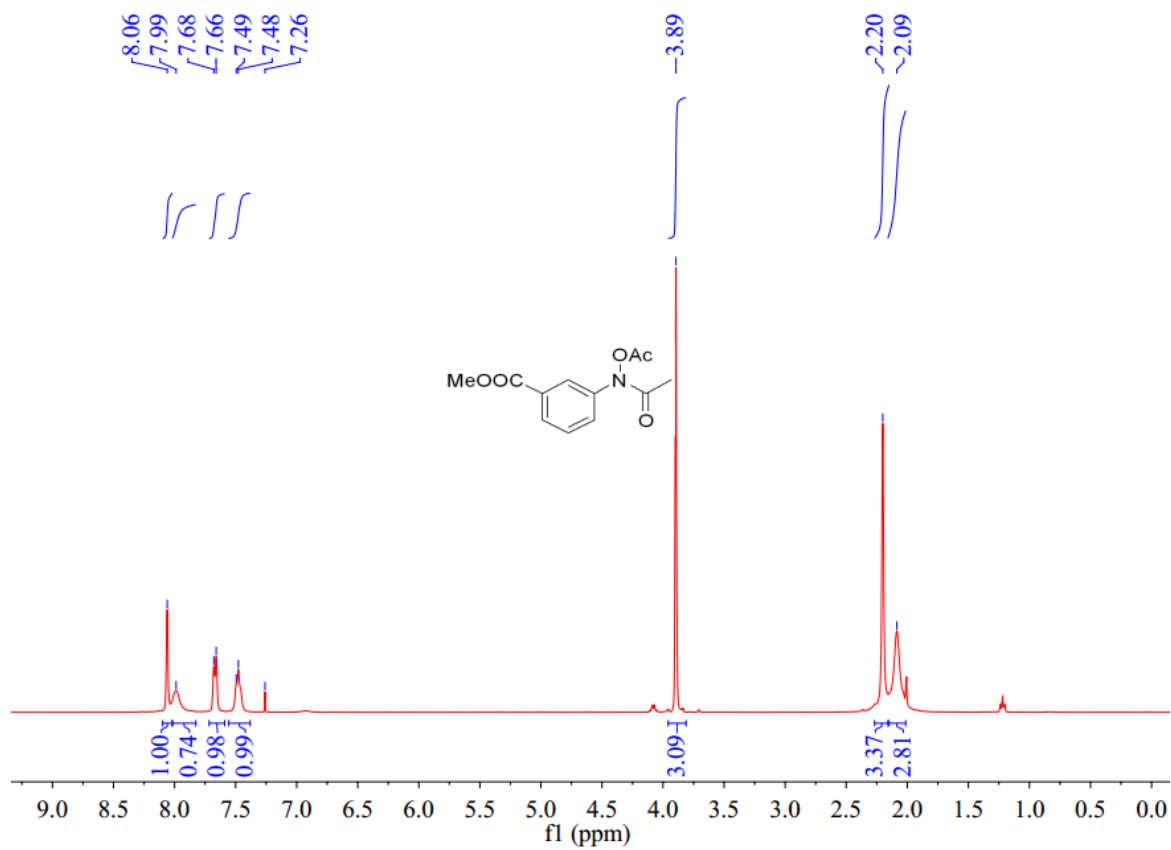

<sup>13</sup>C NMR of **6q**

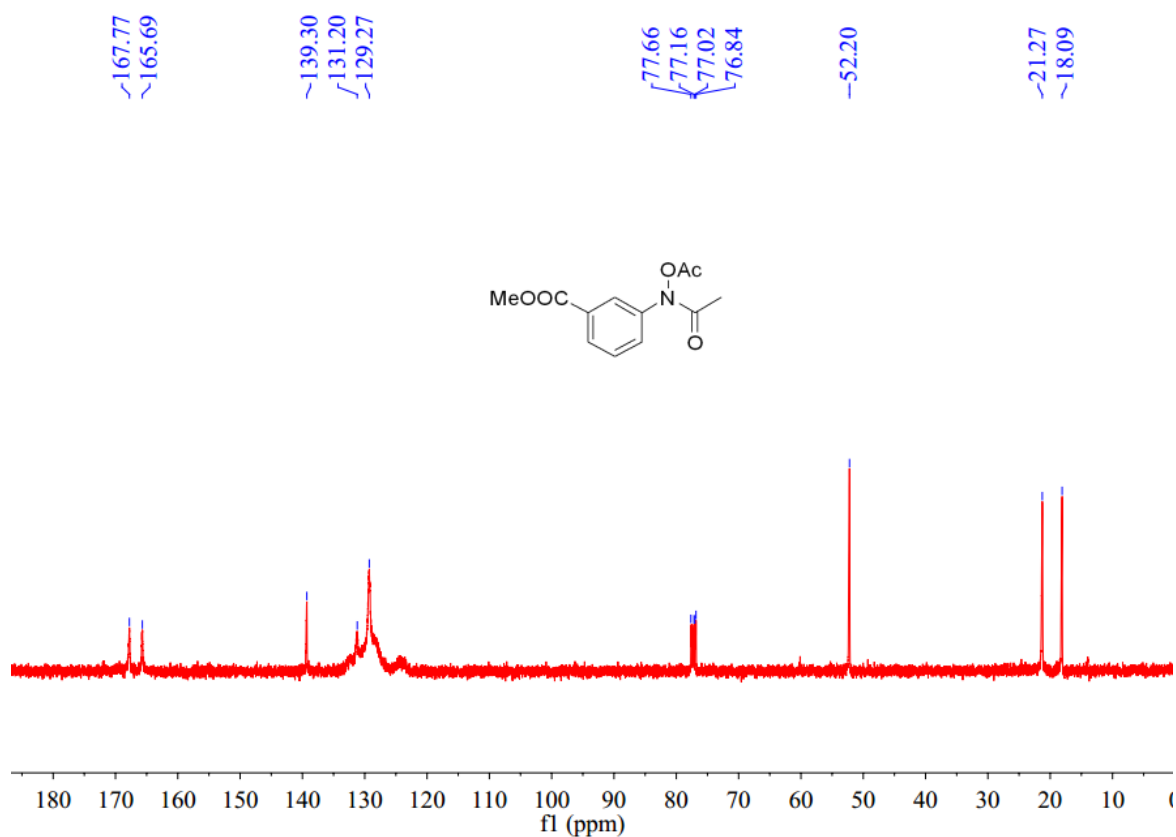

<sup>1</sup>H NMR of **6r**

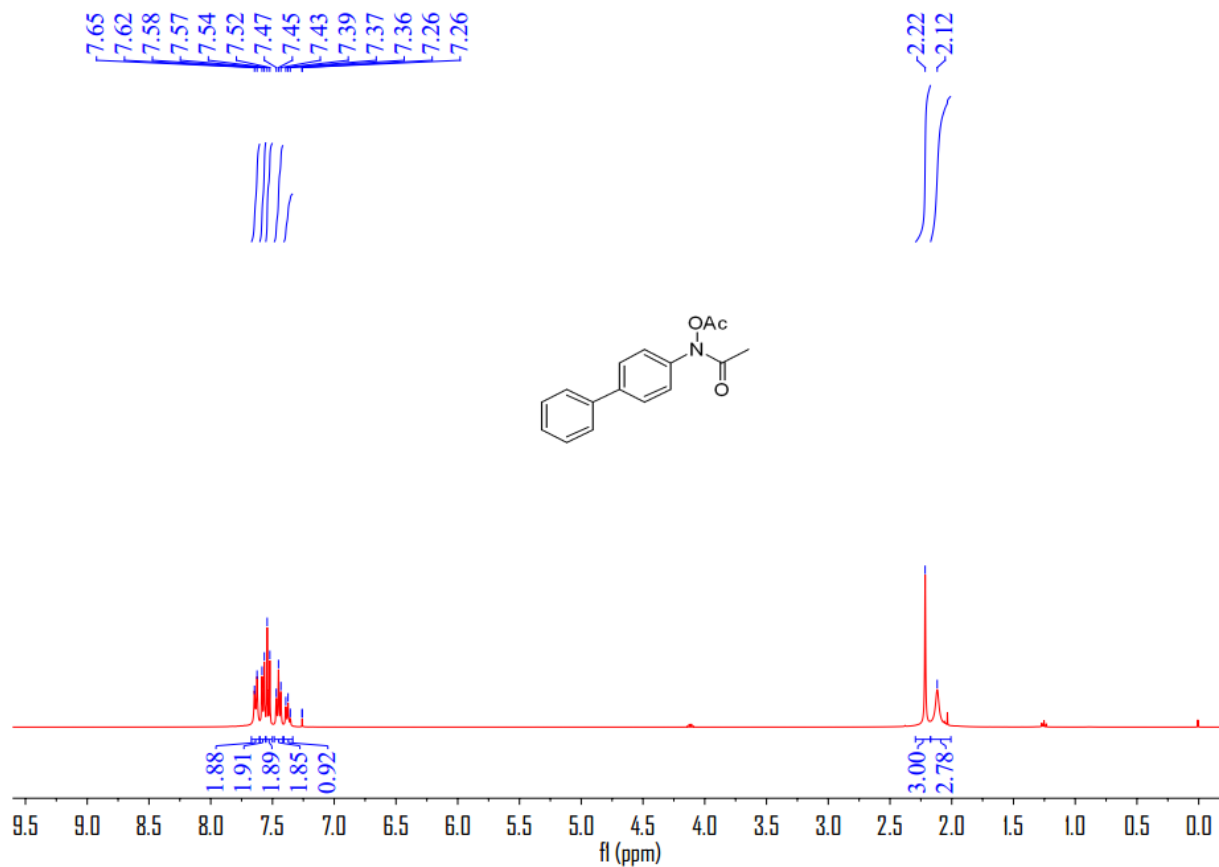

<sup>13</sup>C NMR of 6r

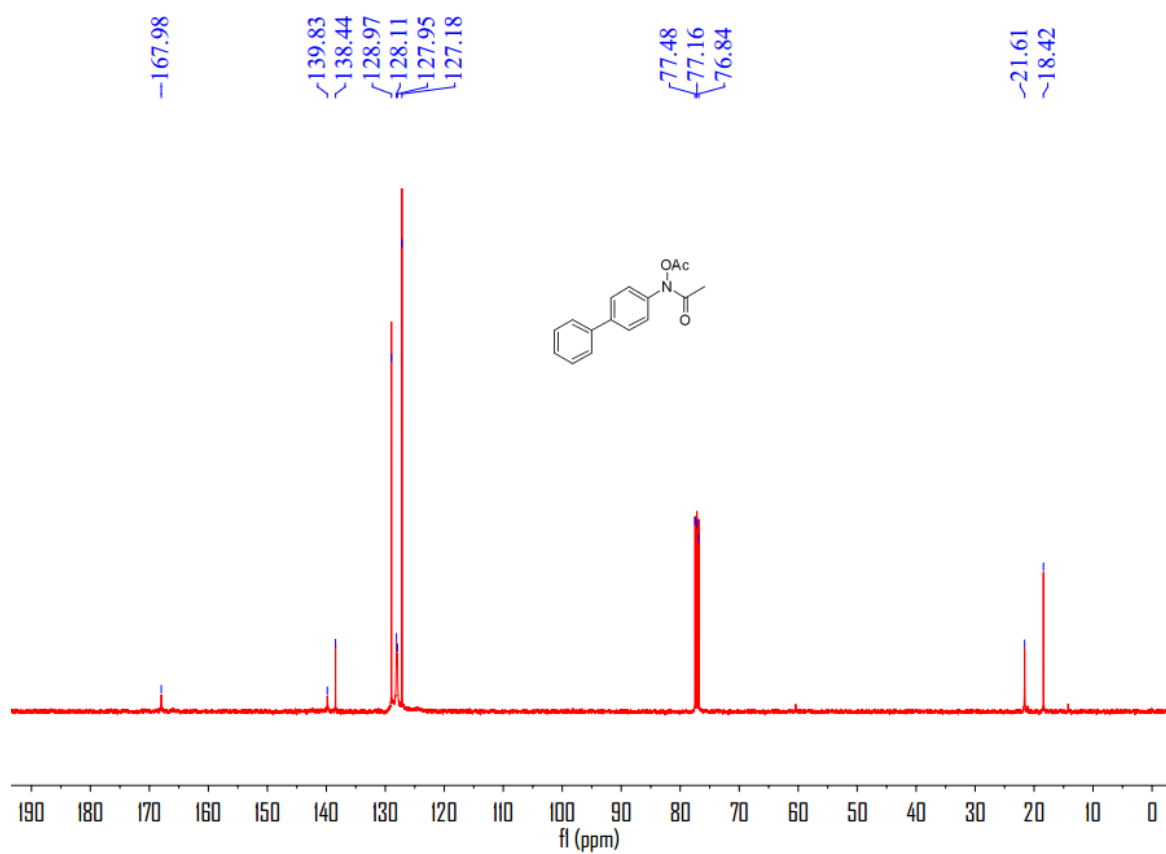

<sup>1</sup>H NMR of 6s

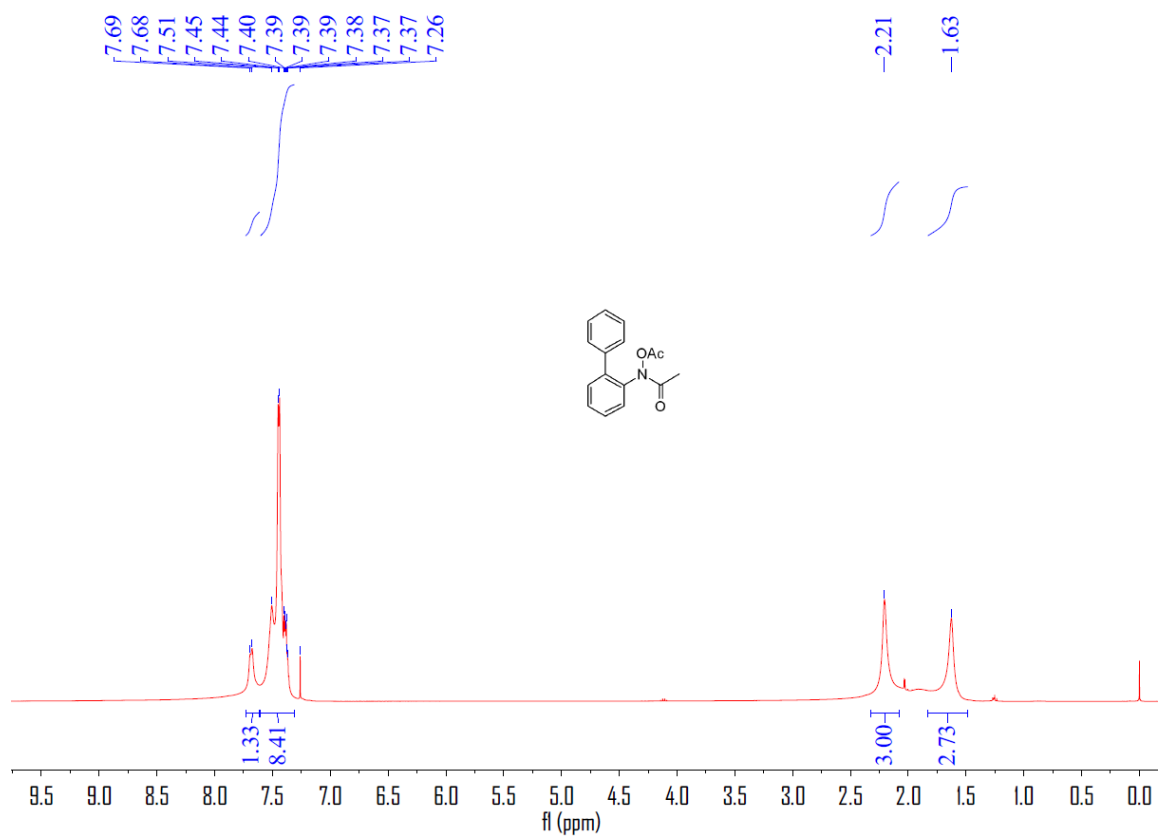

<sup>13</sup>C NMR of **6s**

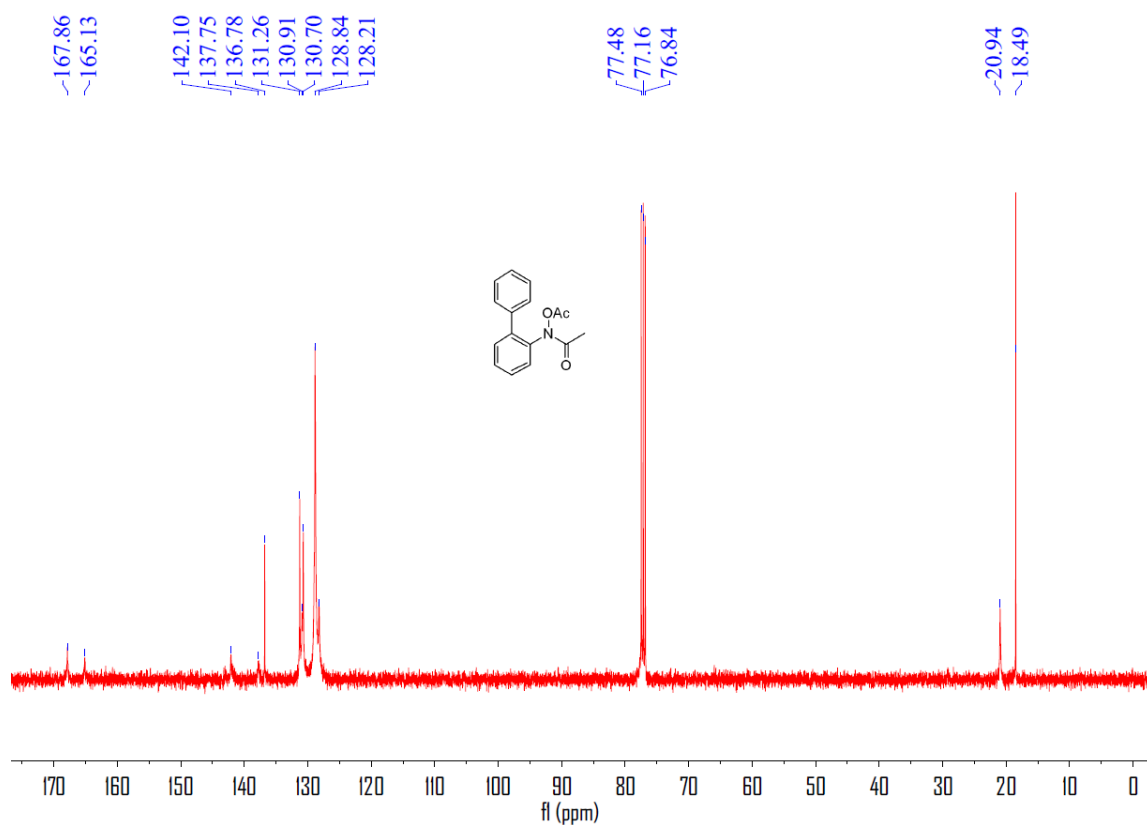

<sup>1</sup>H NMR of **6t**

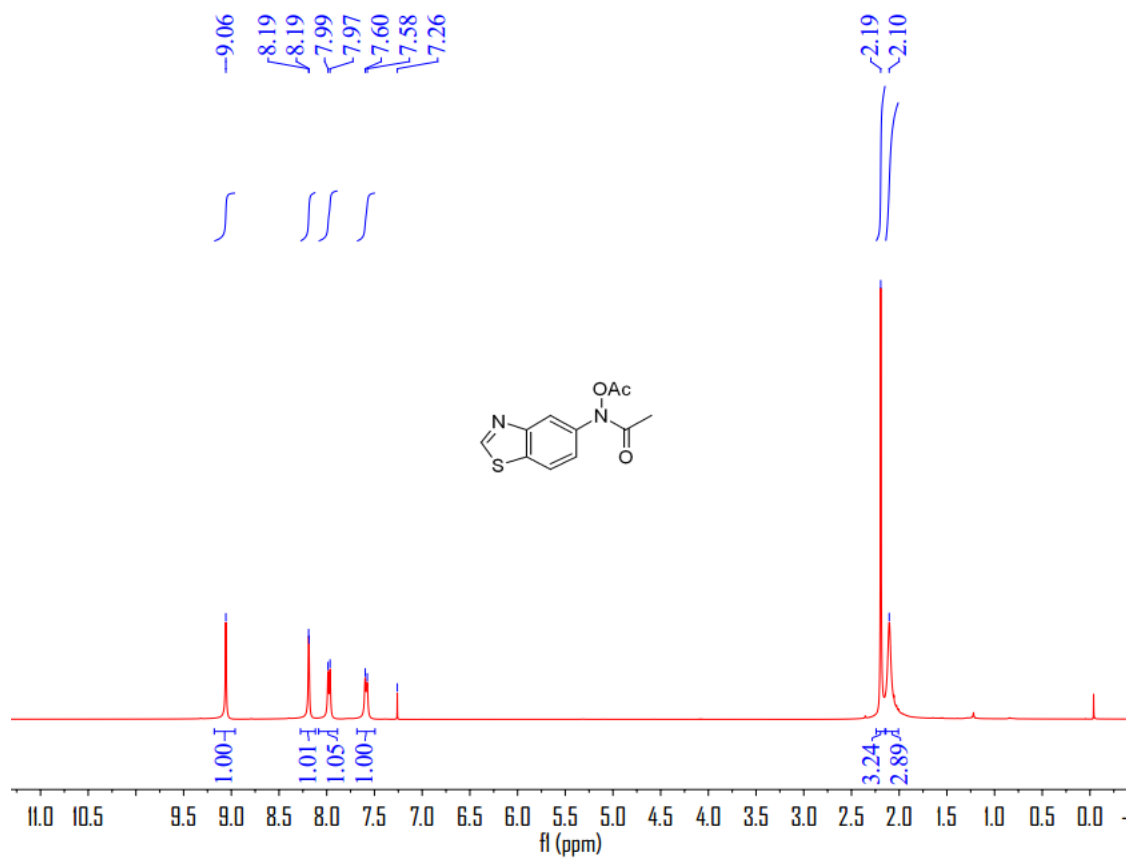



<sup>13</sup>C NMR of 6t

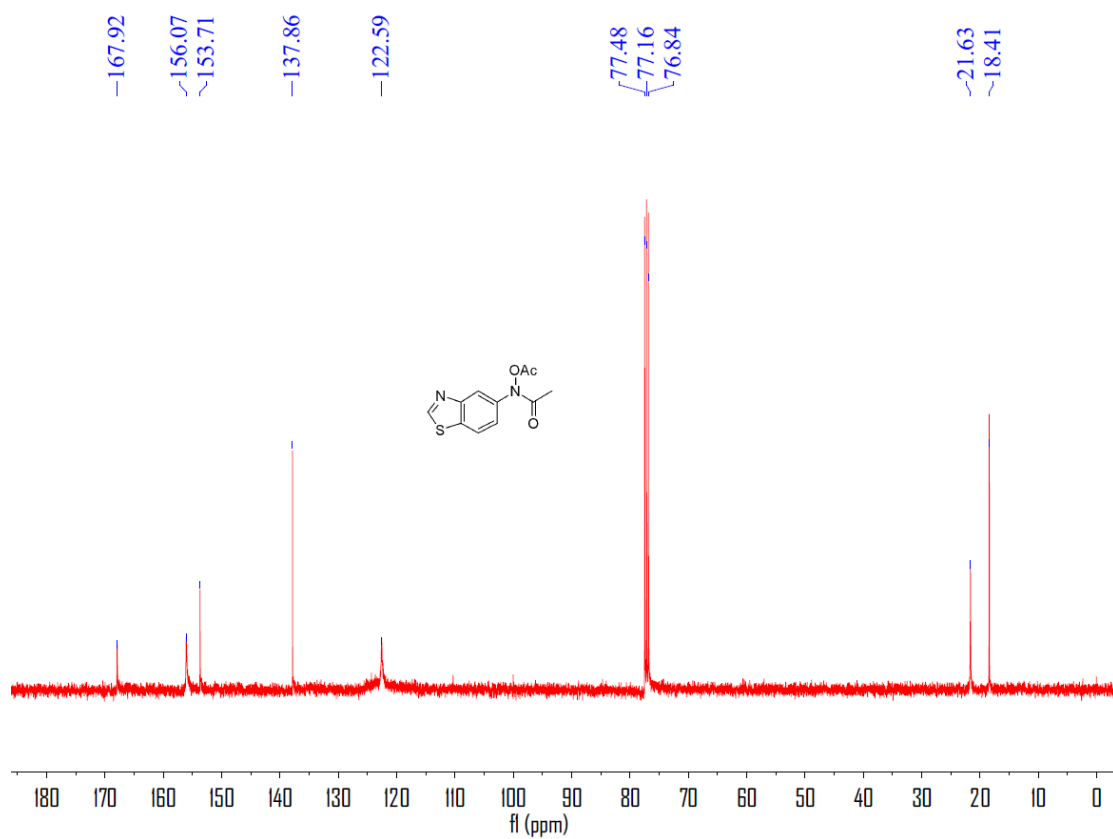

<sup>1</sup>H NMR of 6u

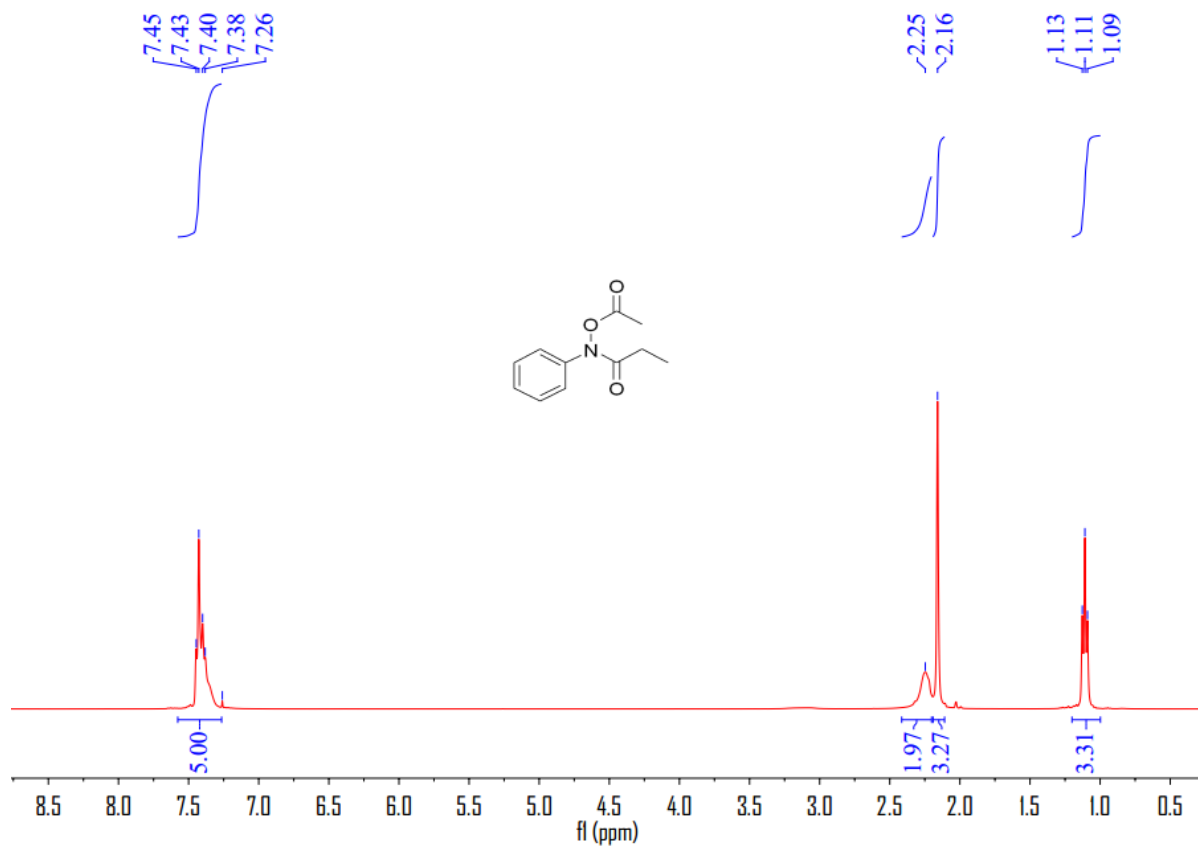

<sup>13</sup>C NMR of 6u

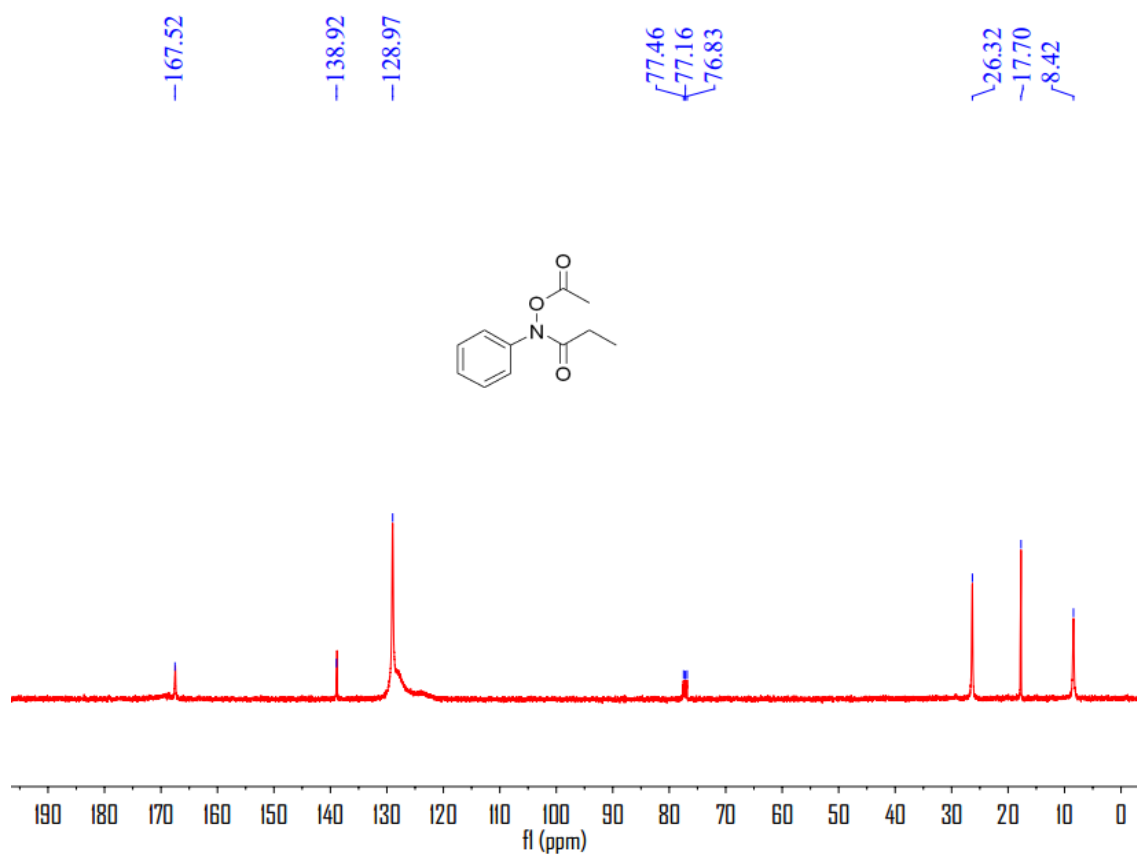

<sup>1</sup>H NMR of 6v

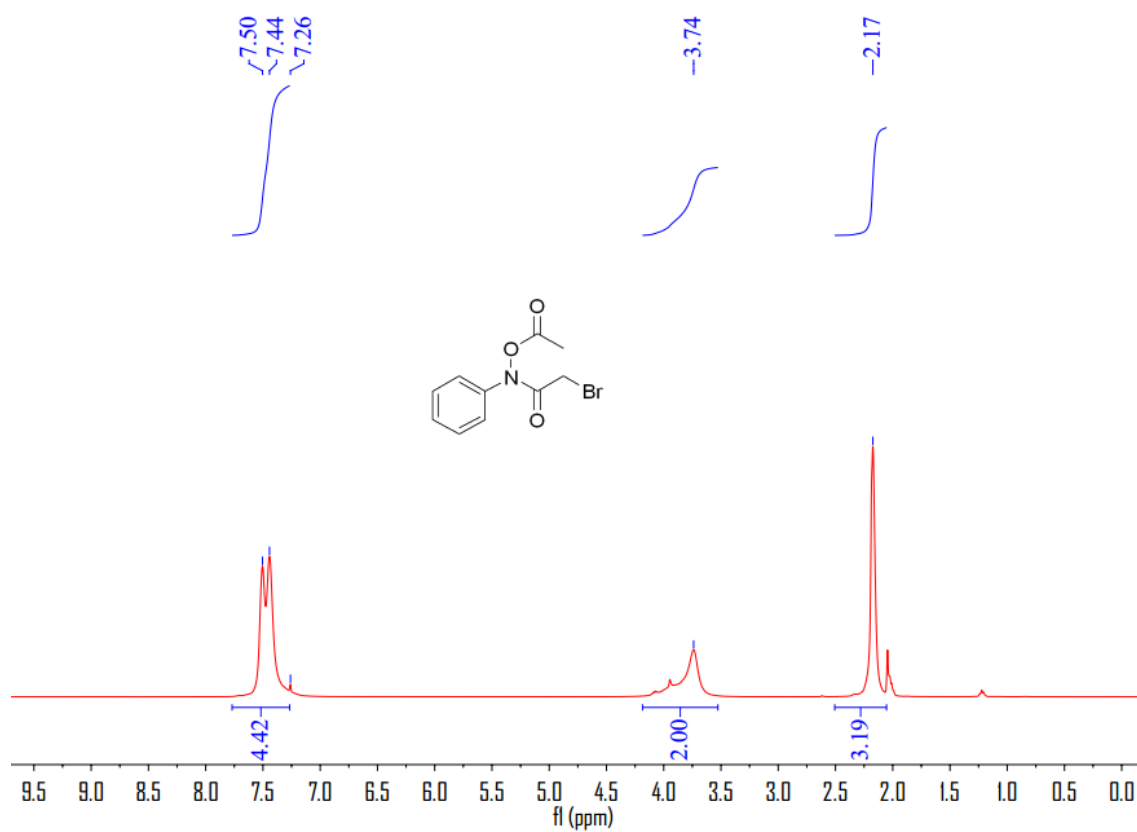

<sup>13</sup>C NMR of 6v

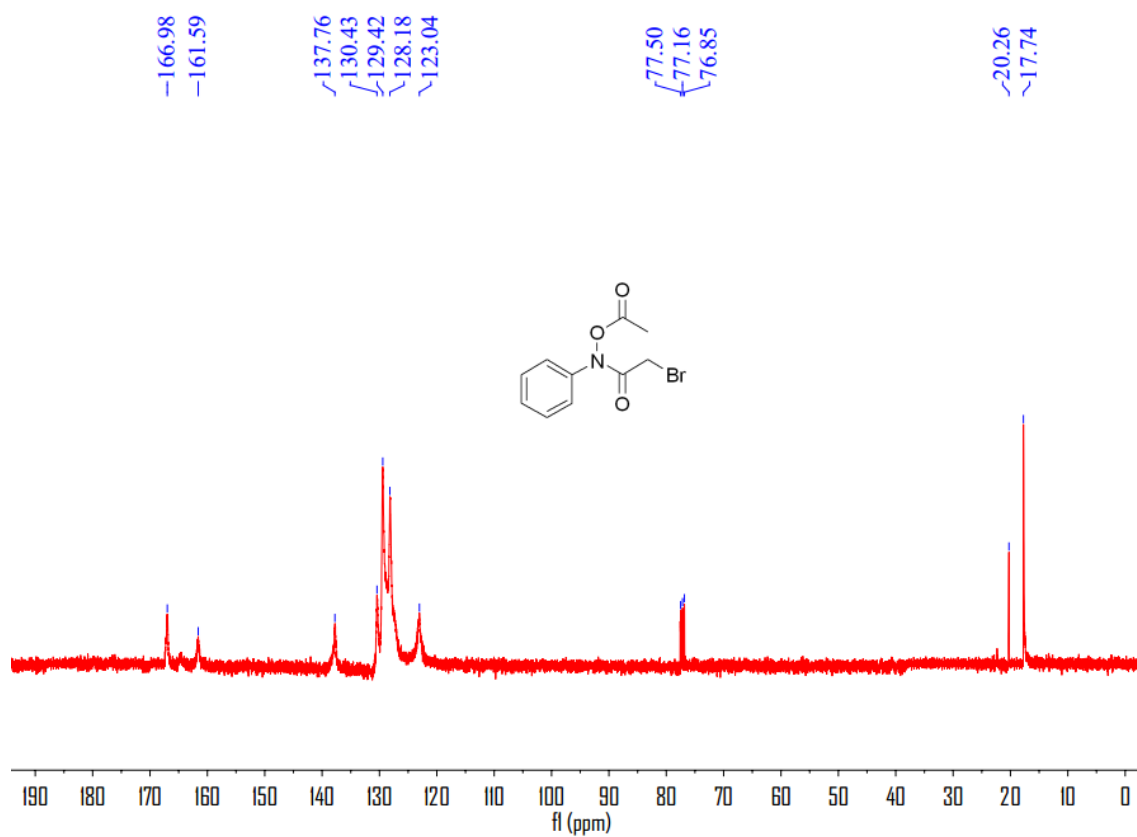

<sup>1</sup>H NMR of 4a

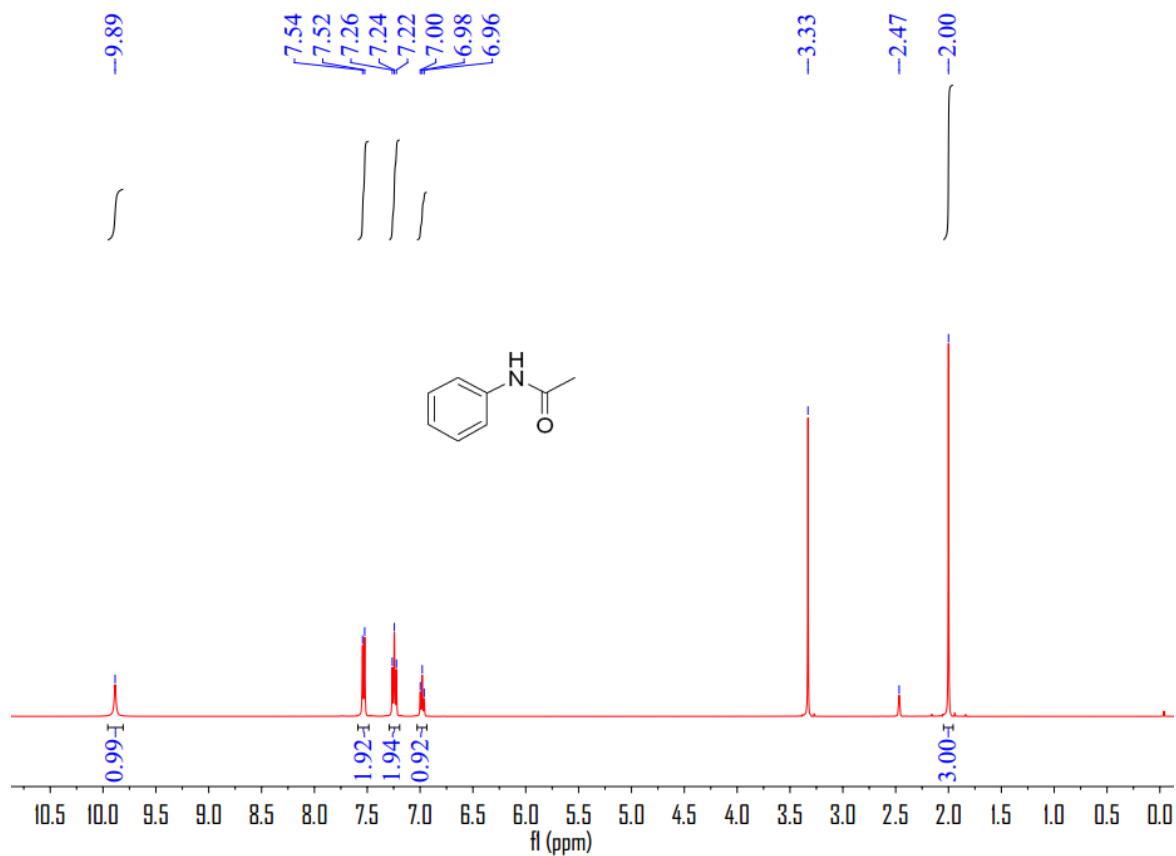

<sup>13</sup>C NMR of **4a**

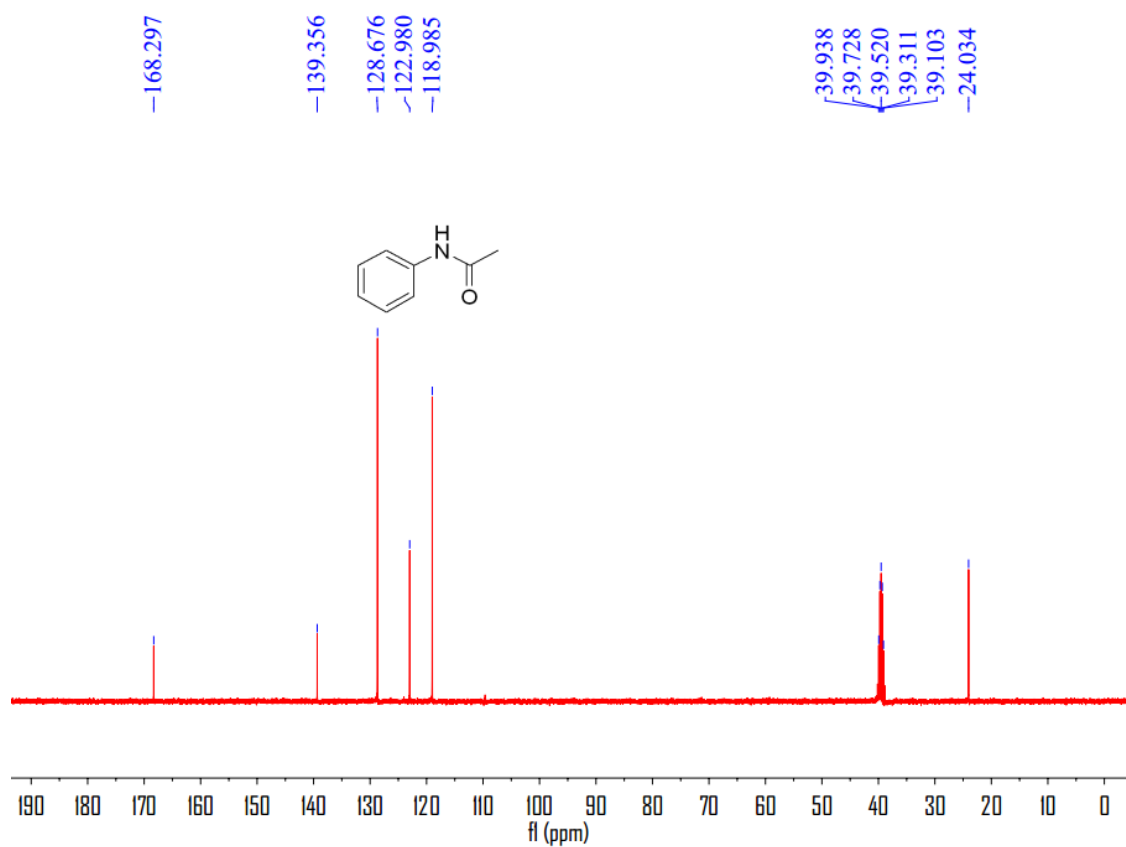

<sup>1</sup>H NMR of **4b**

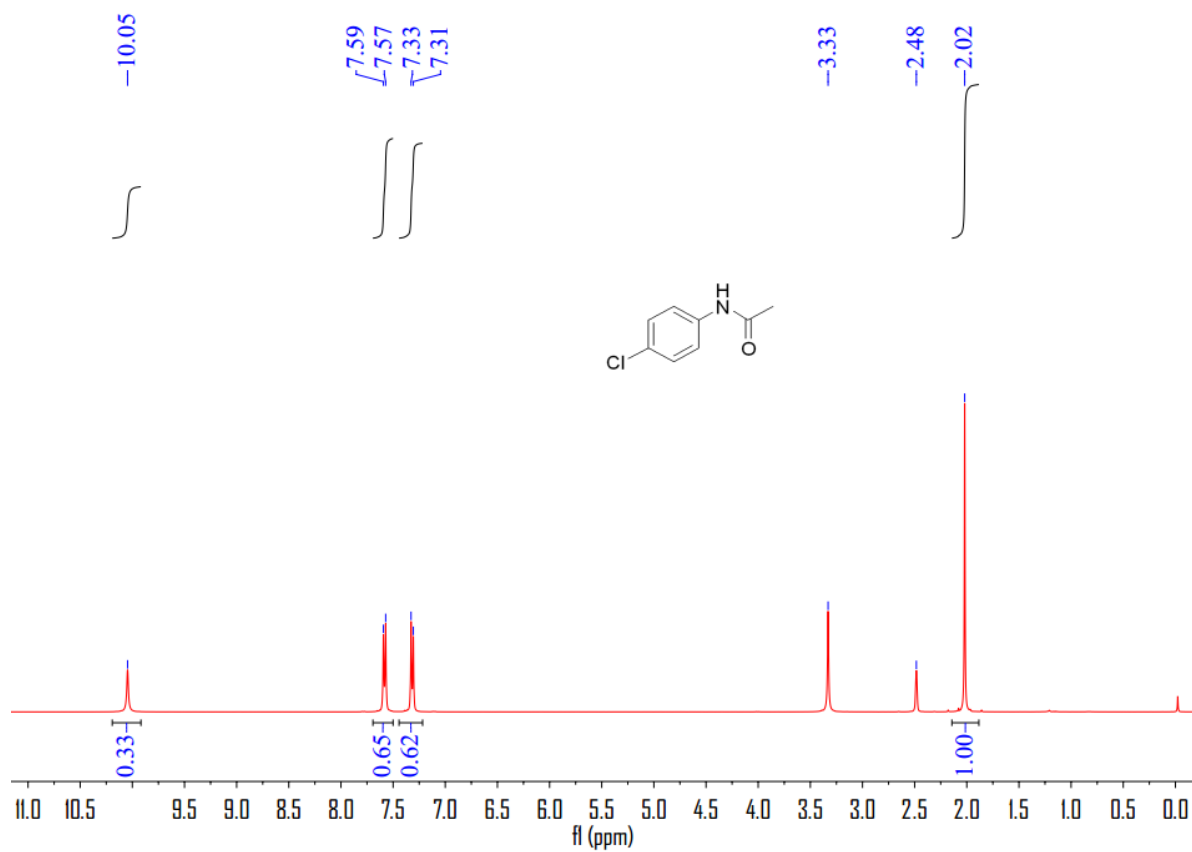

<sup>13</sup>C NMR of **4b**

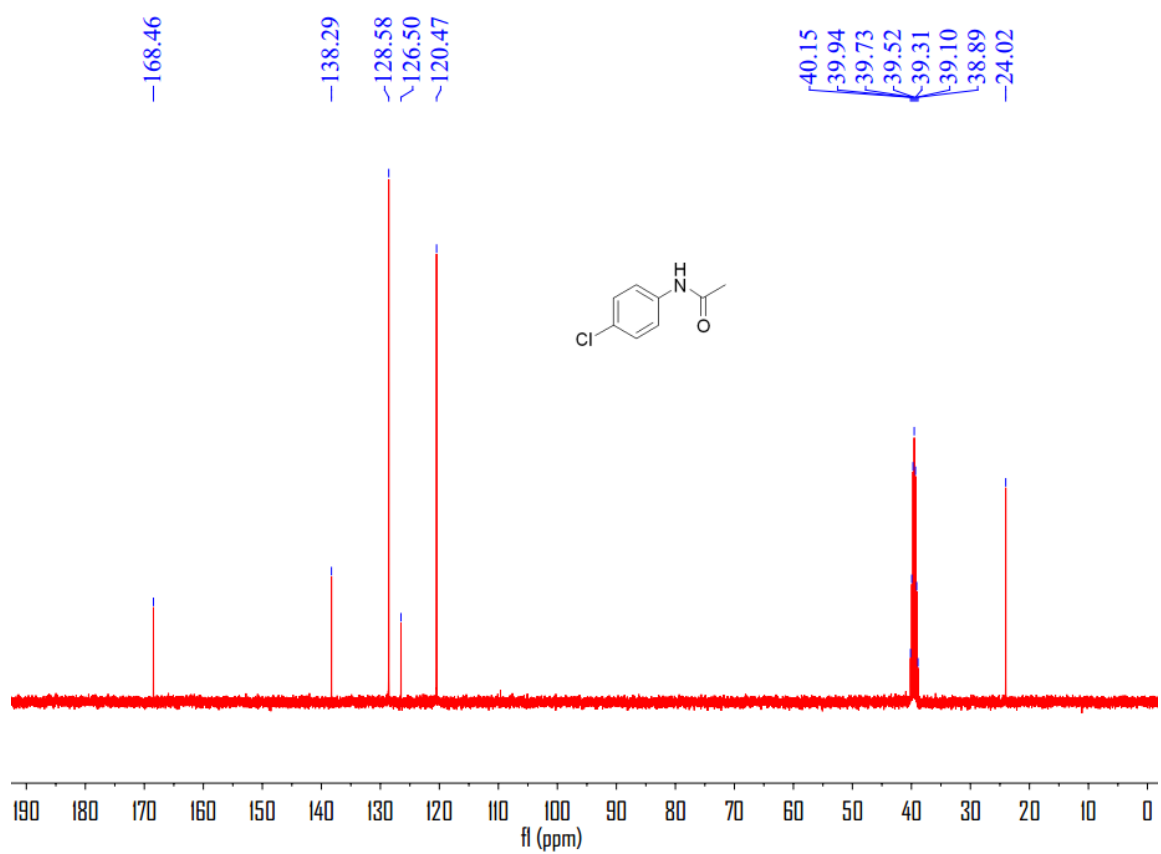

<sup>1</sup>H NMR of **4c**

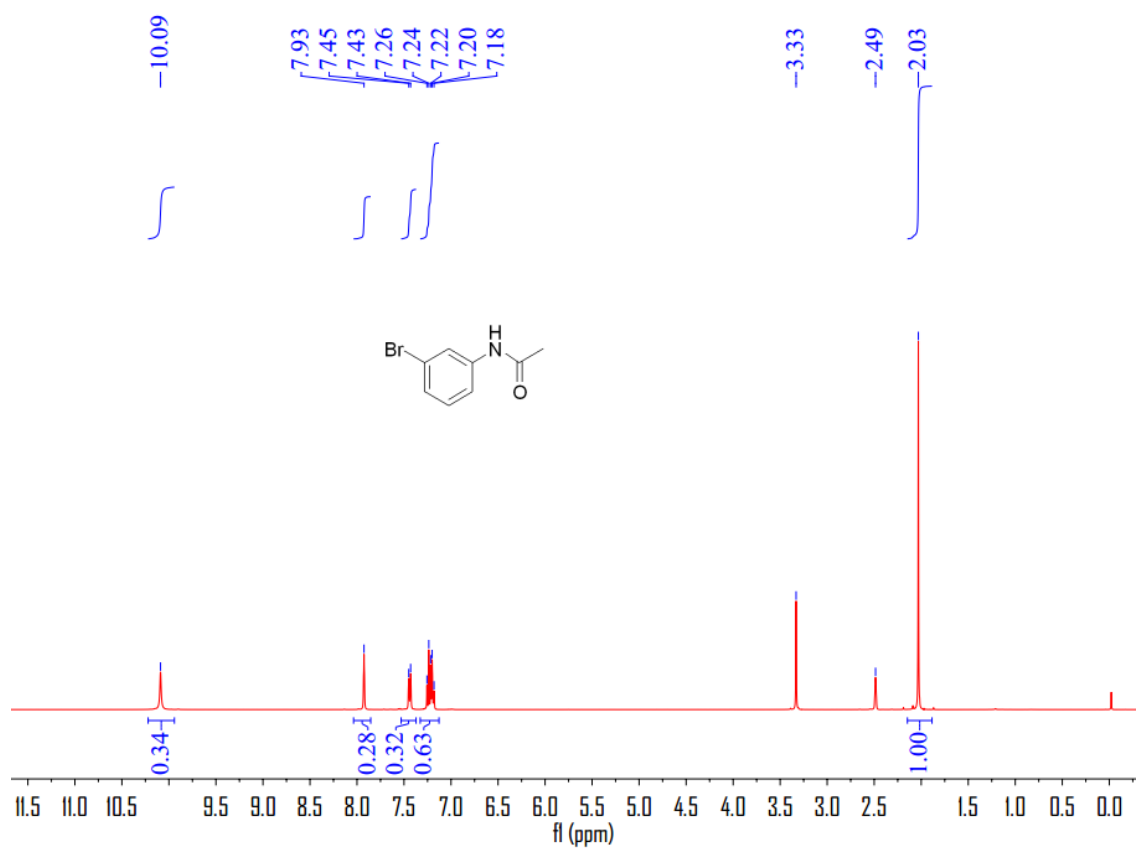

<sup>13</sup>C NMR of 4c

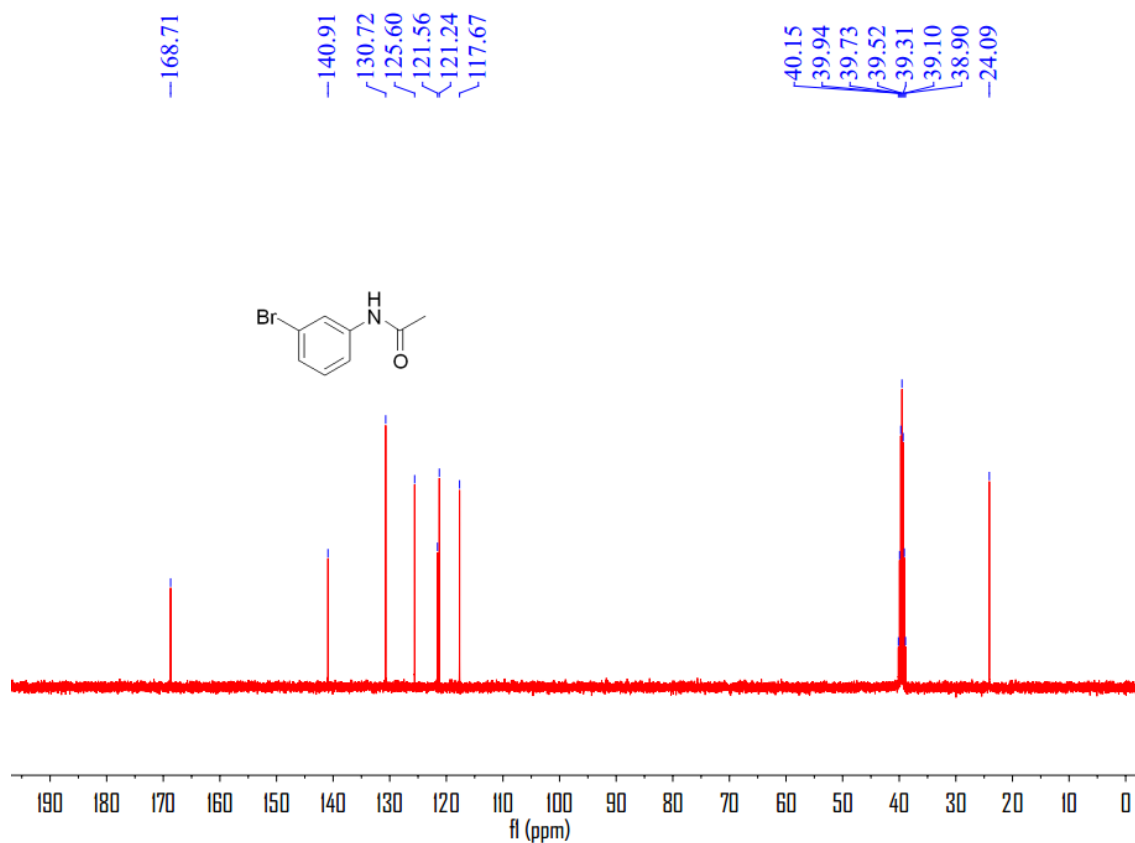

<sup>1</sup>H NMR of 4d

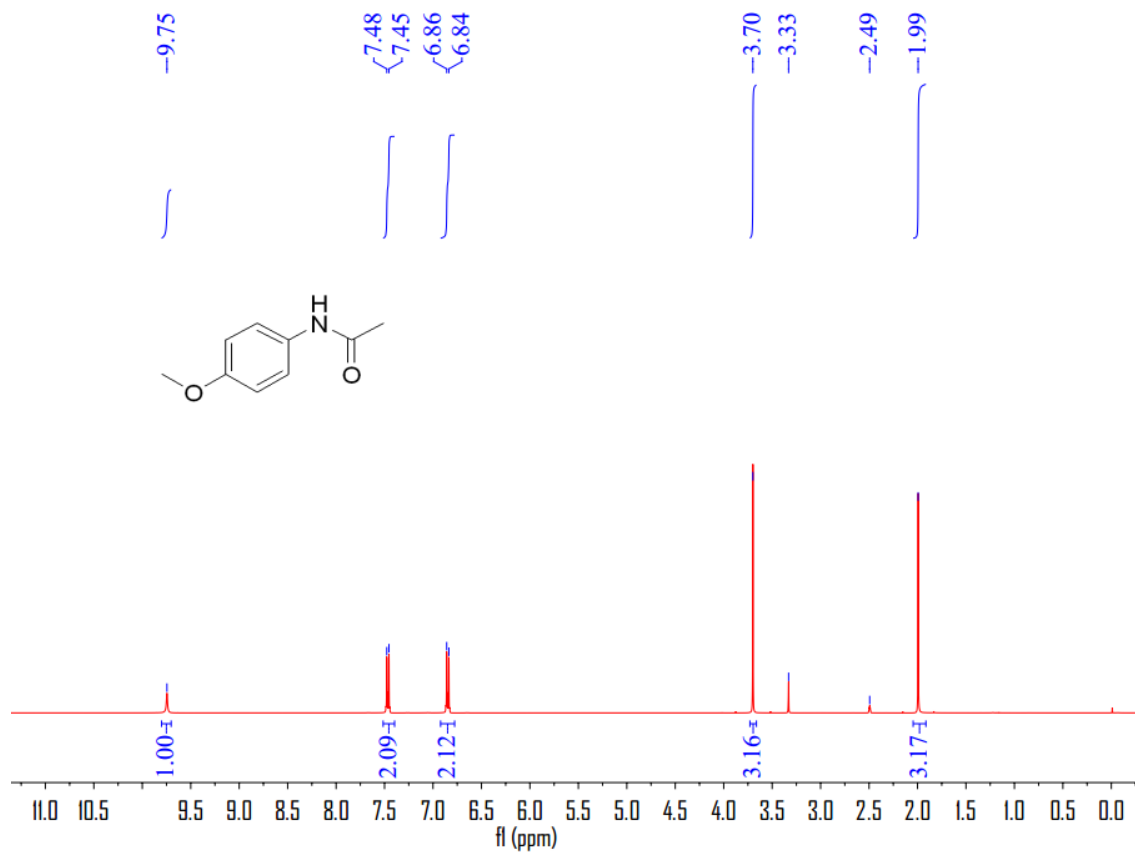

<sup>13</sup>C NMR of 4d

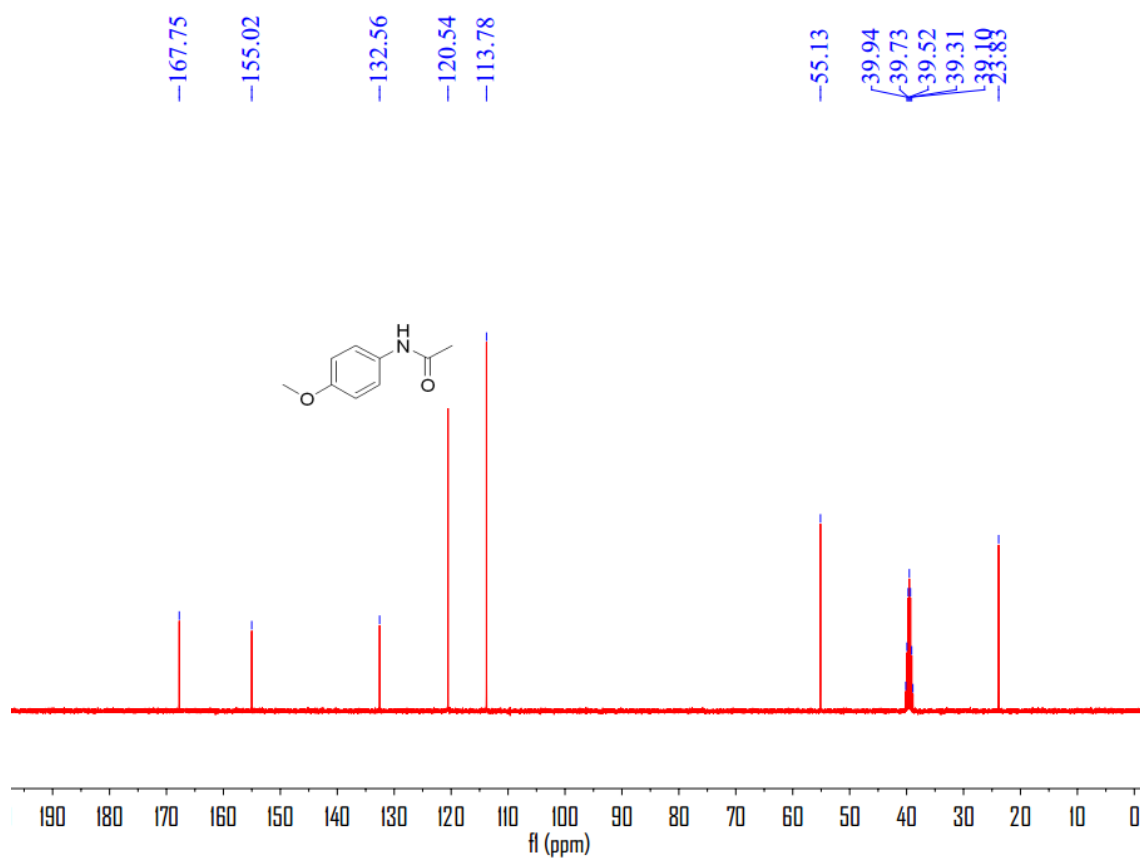

<sup>1</sup>H NMR of 4e

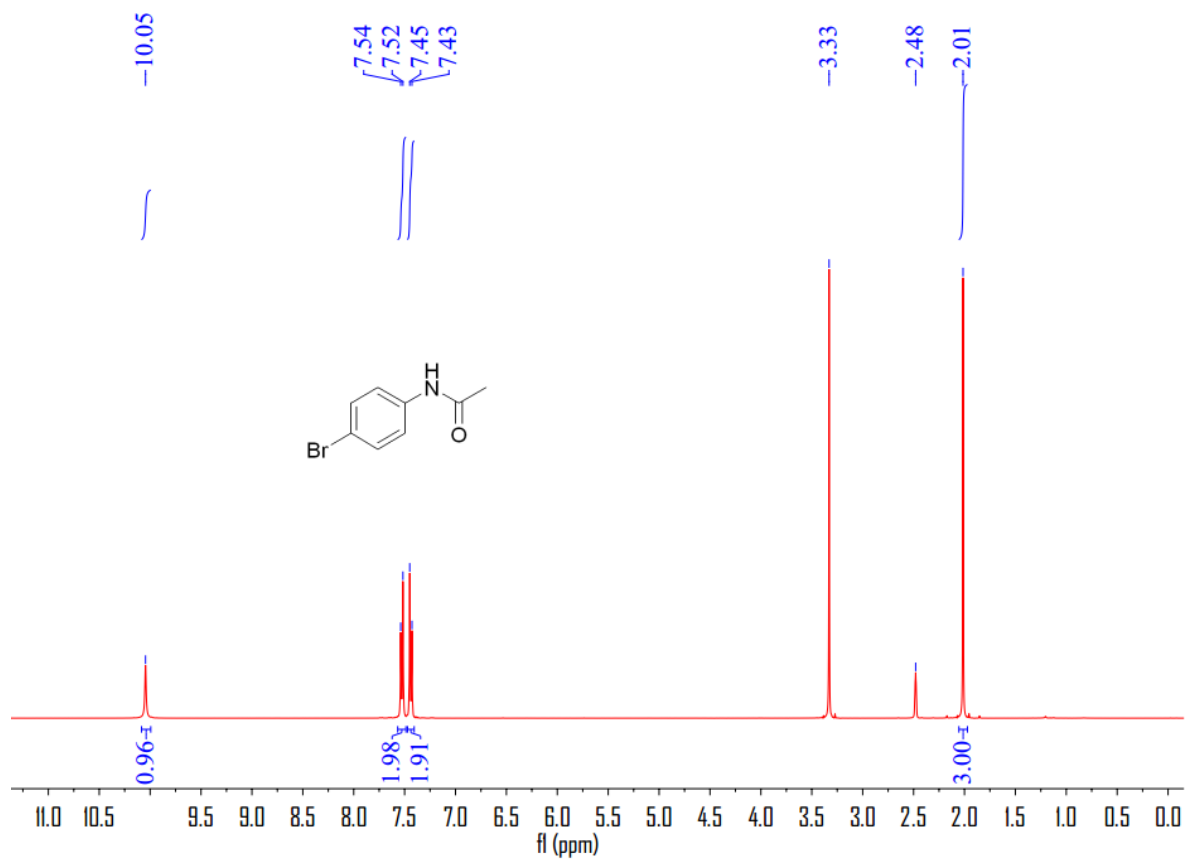

<sup>13</sup>C NMR of 4e

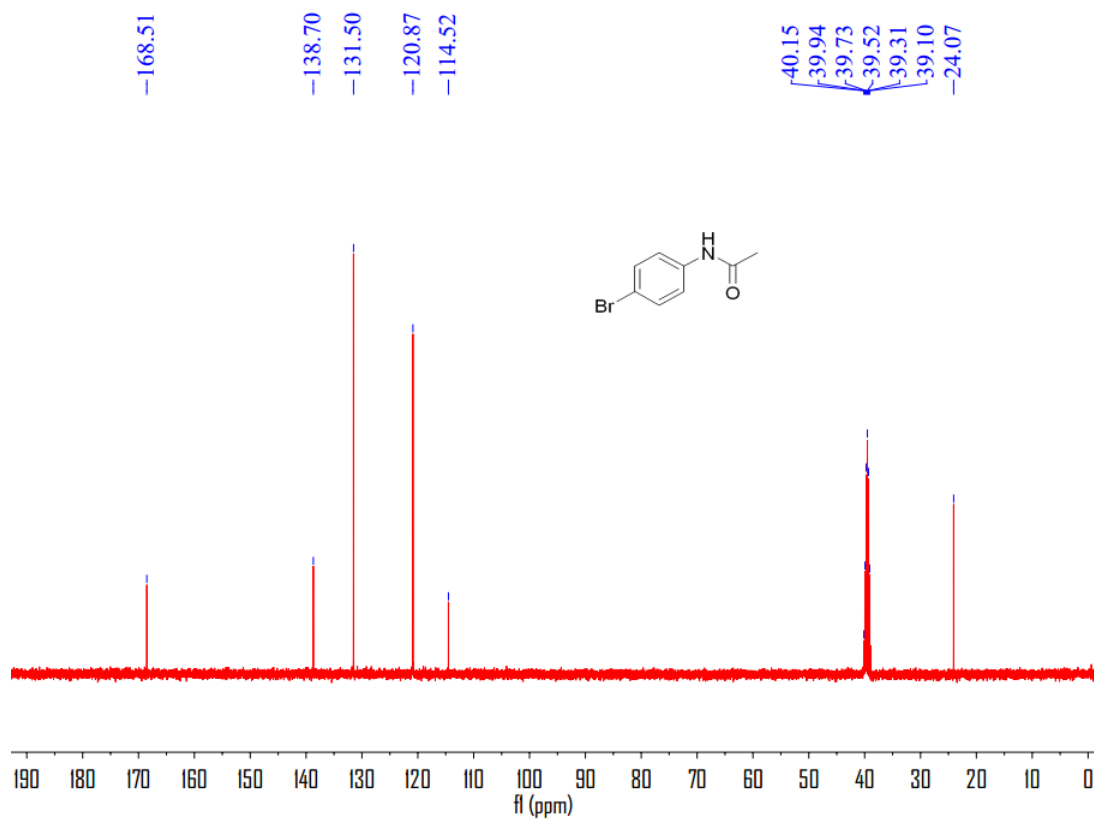

<sup>1</sup>H NMR of 4f

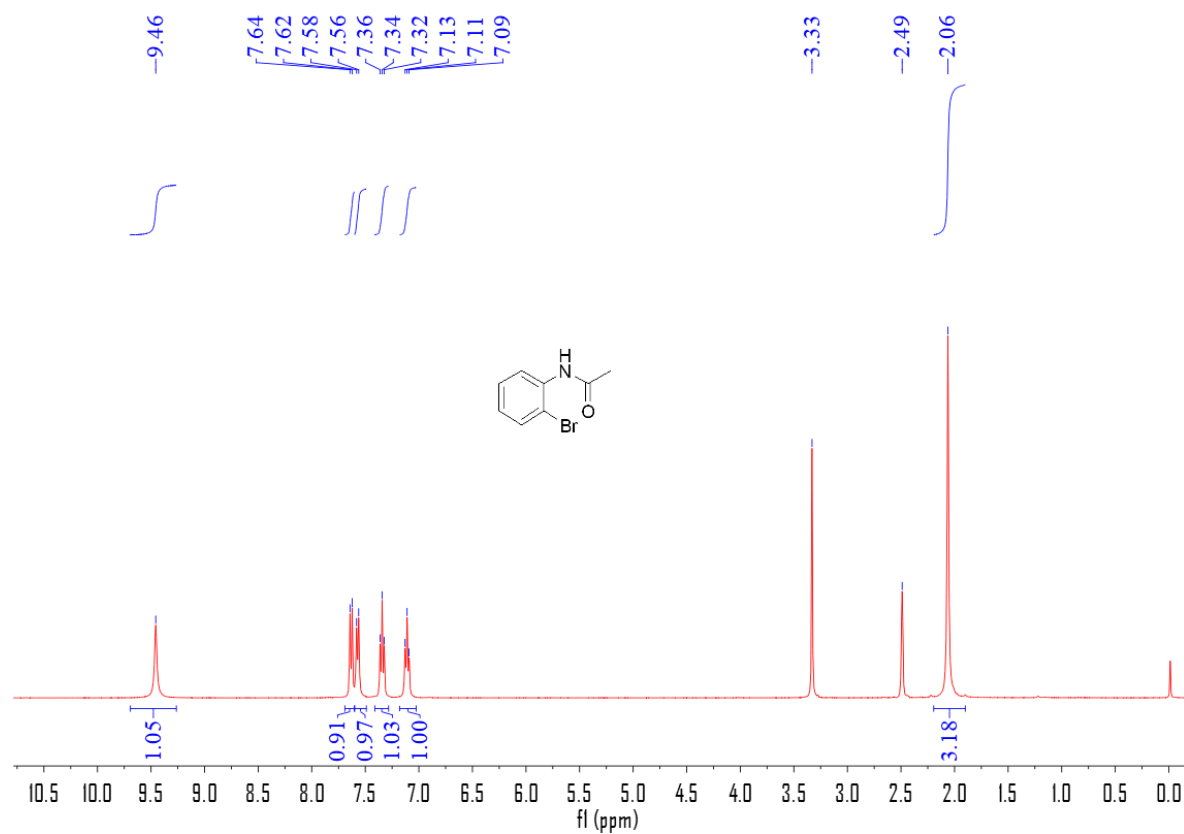



<sup>13</sup>C NMR of 4f

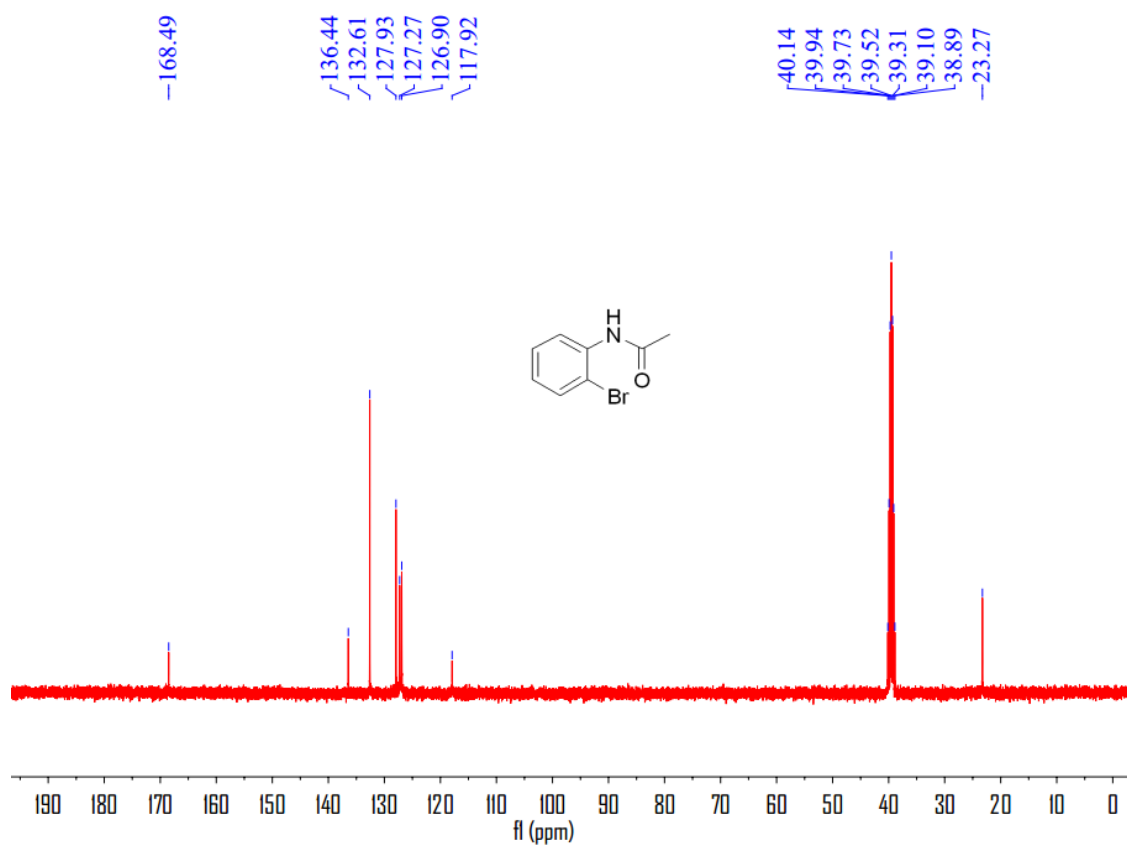

<sup>1</sup>H NMR of 4g

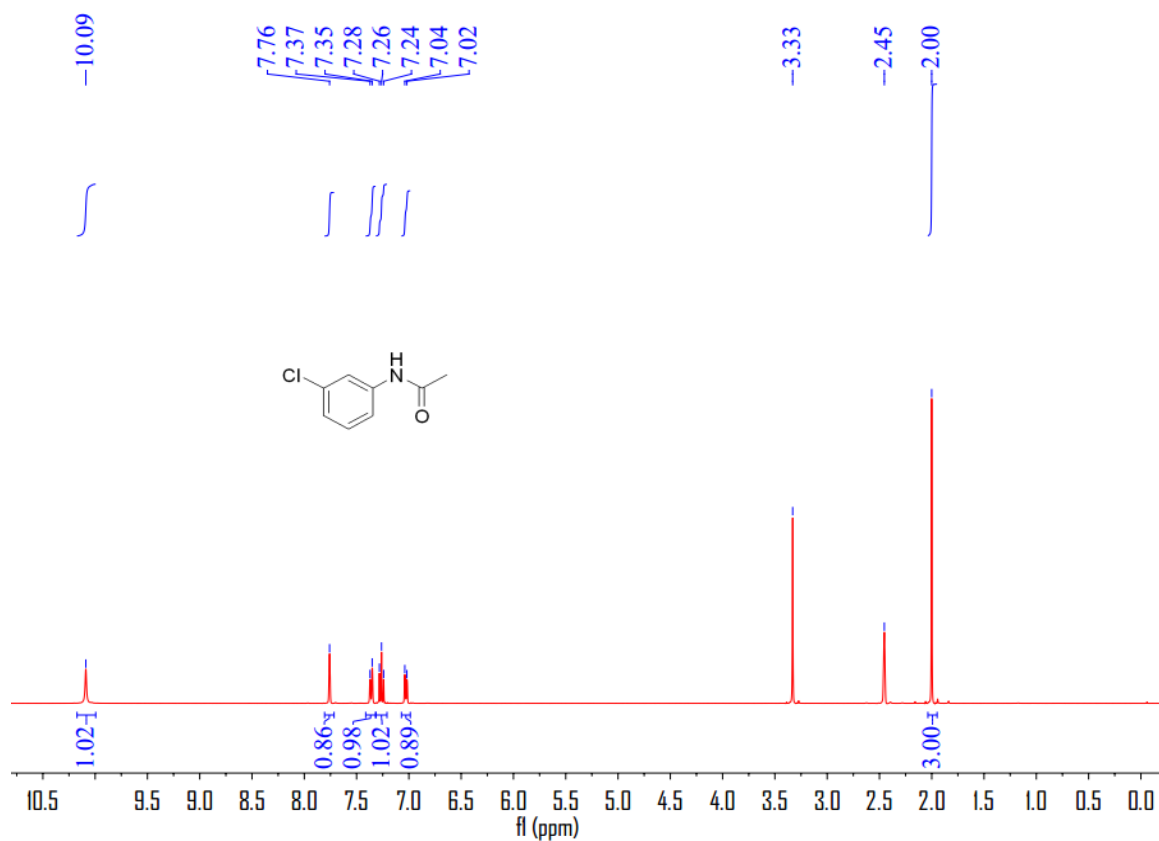

<sup>13</sup>C NMR of 4g

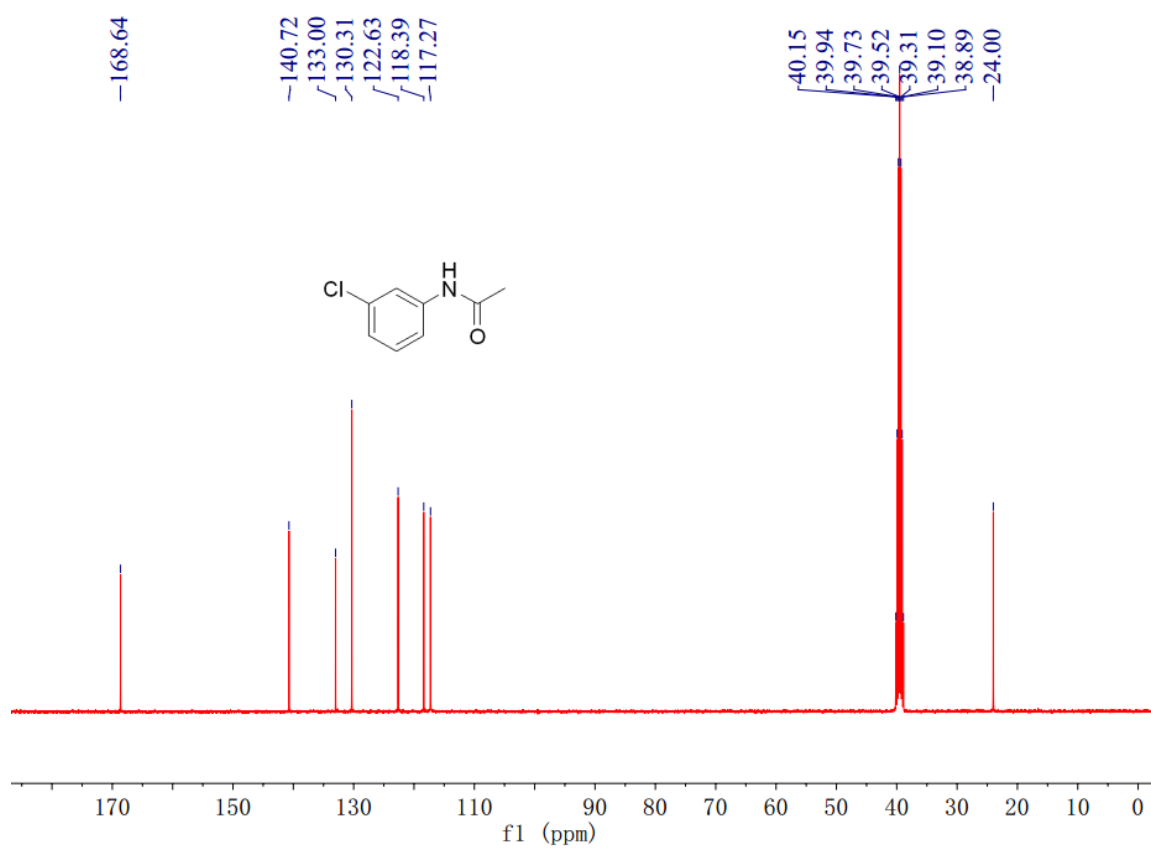

<sup>1</sup>H NMR of 4h

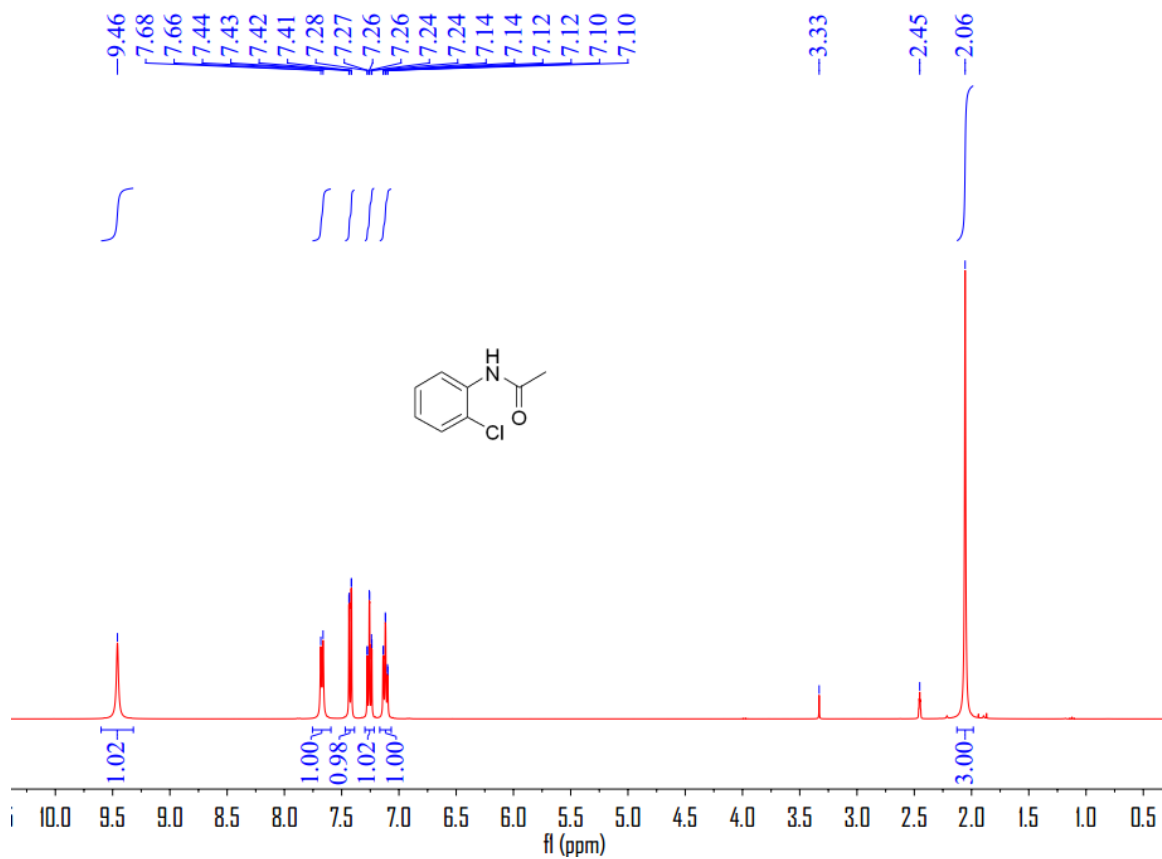

<sup>13</sup>C NMR of **4h**

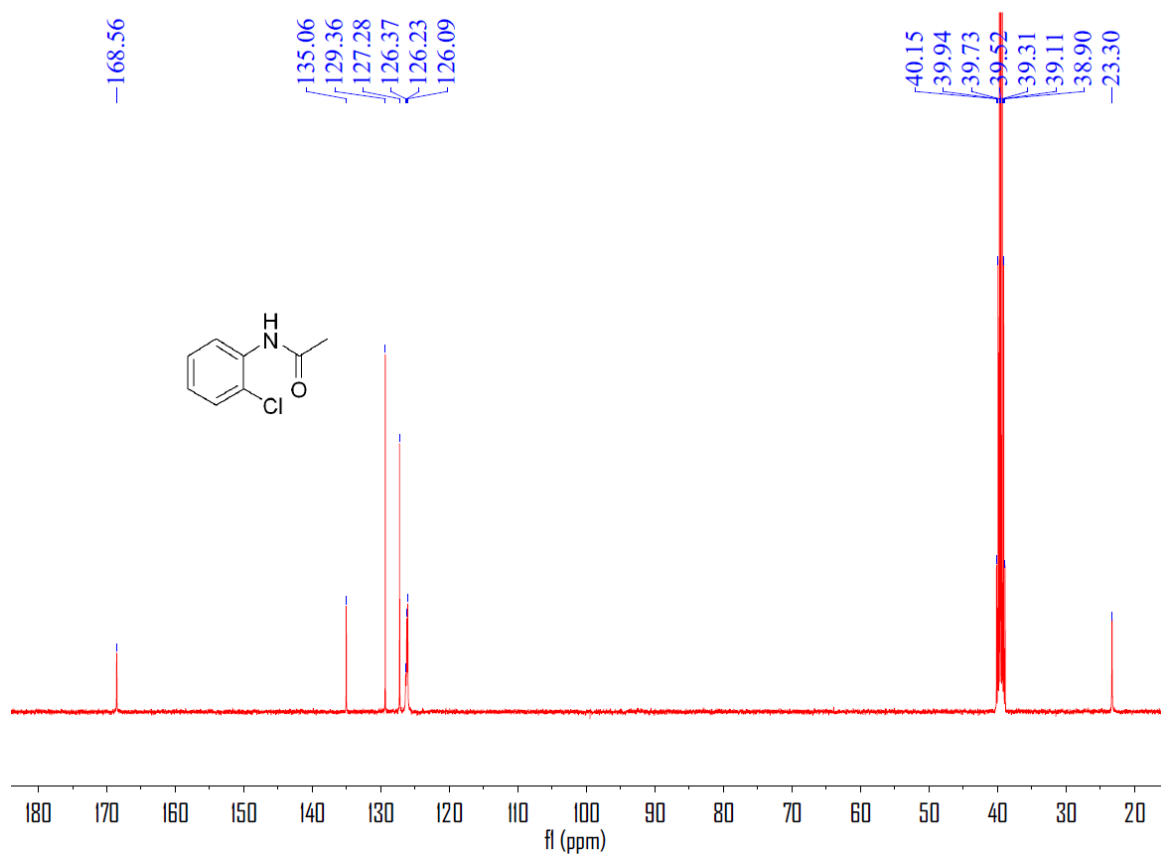

<sup>1</sup>H NMR of **4i**

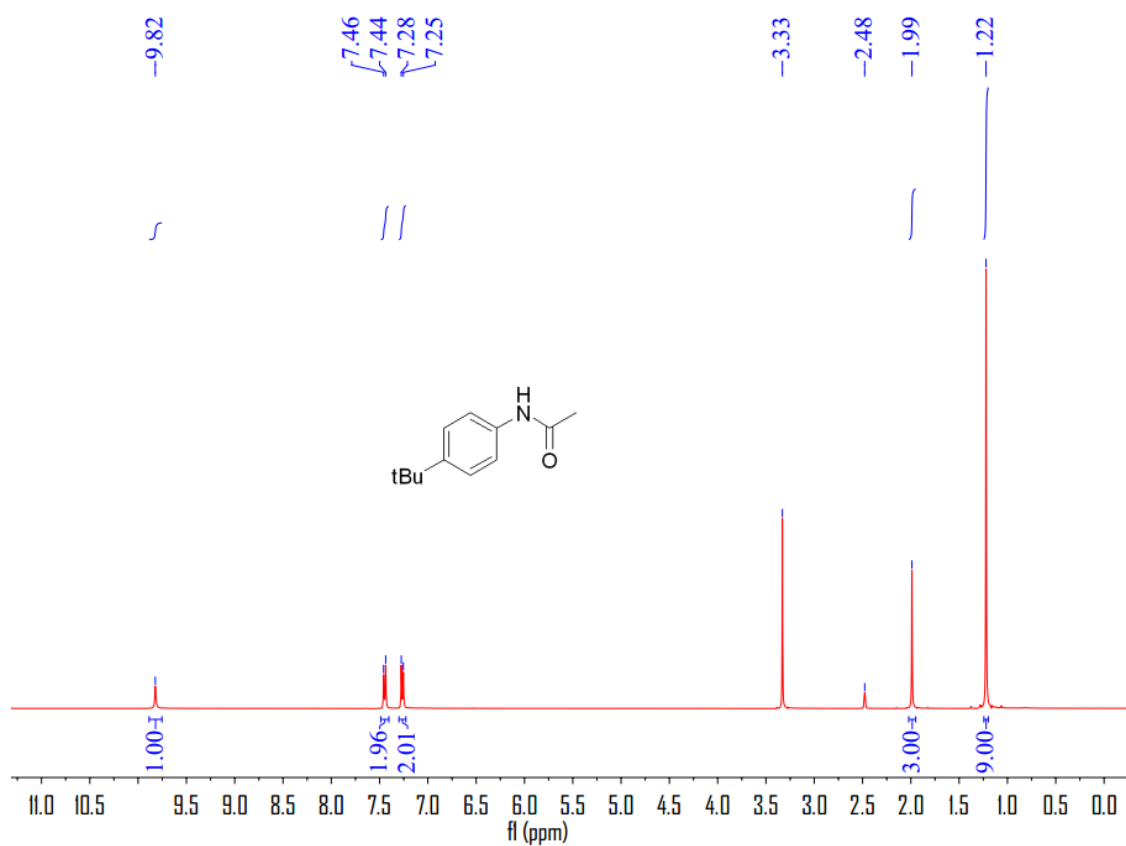

<sup>13</sup>C NMR of 4i

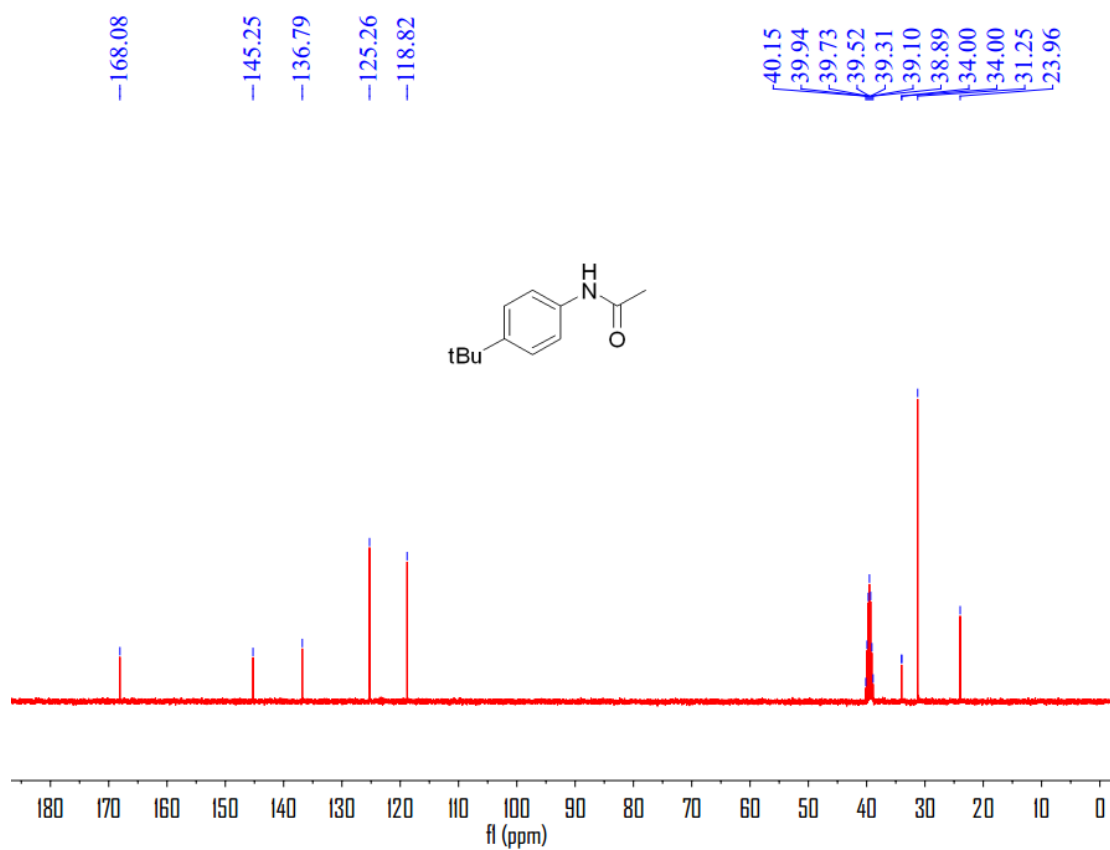

<sup>1</sup>H NMR of 4j

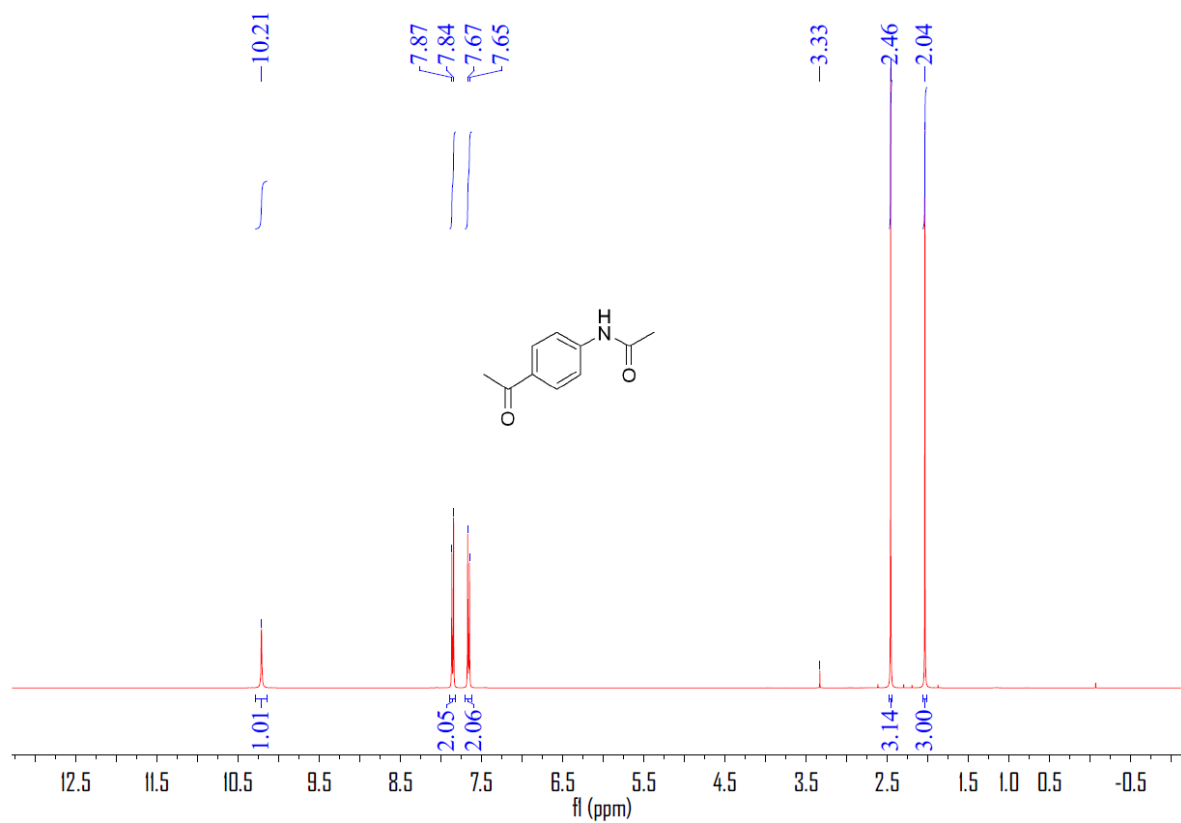

<sup>13</sup>C NMR of **4j**

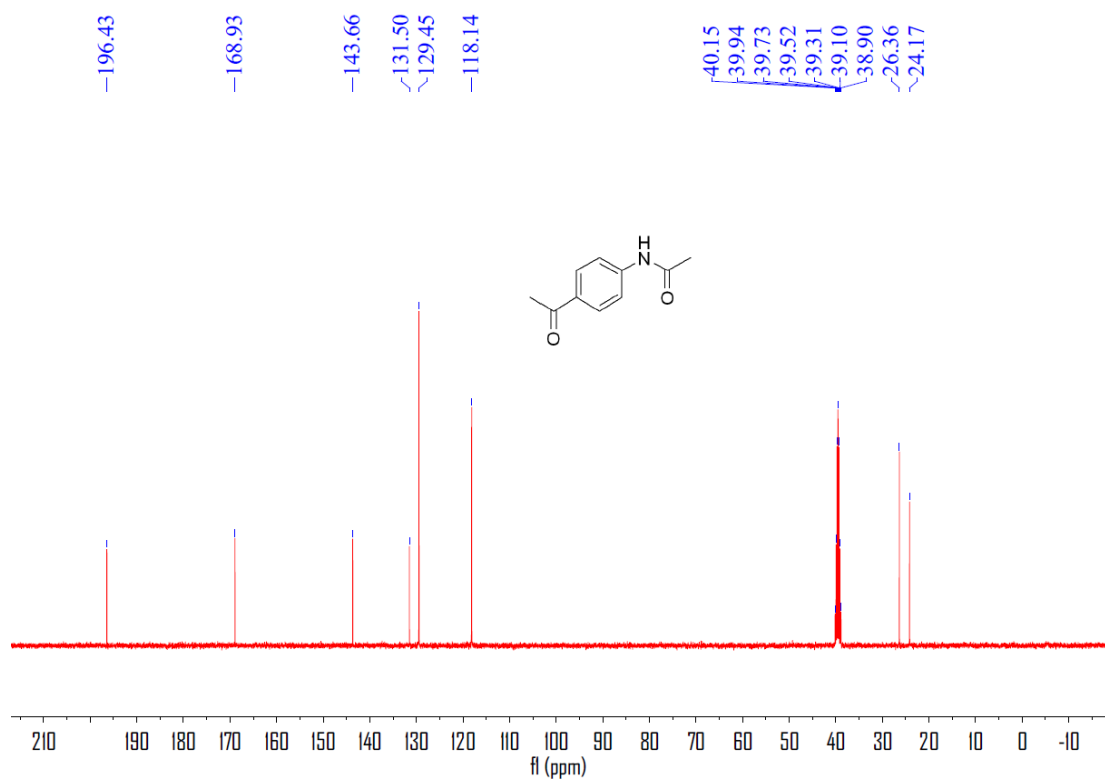

<sup>1</sup>H NMR of **4k**

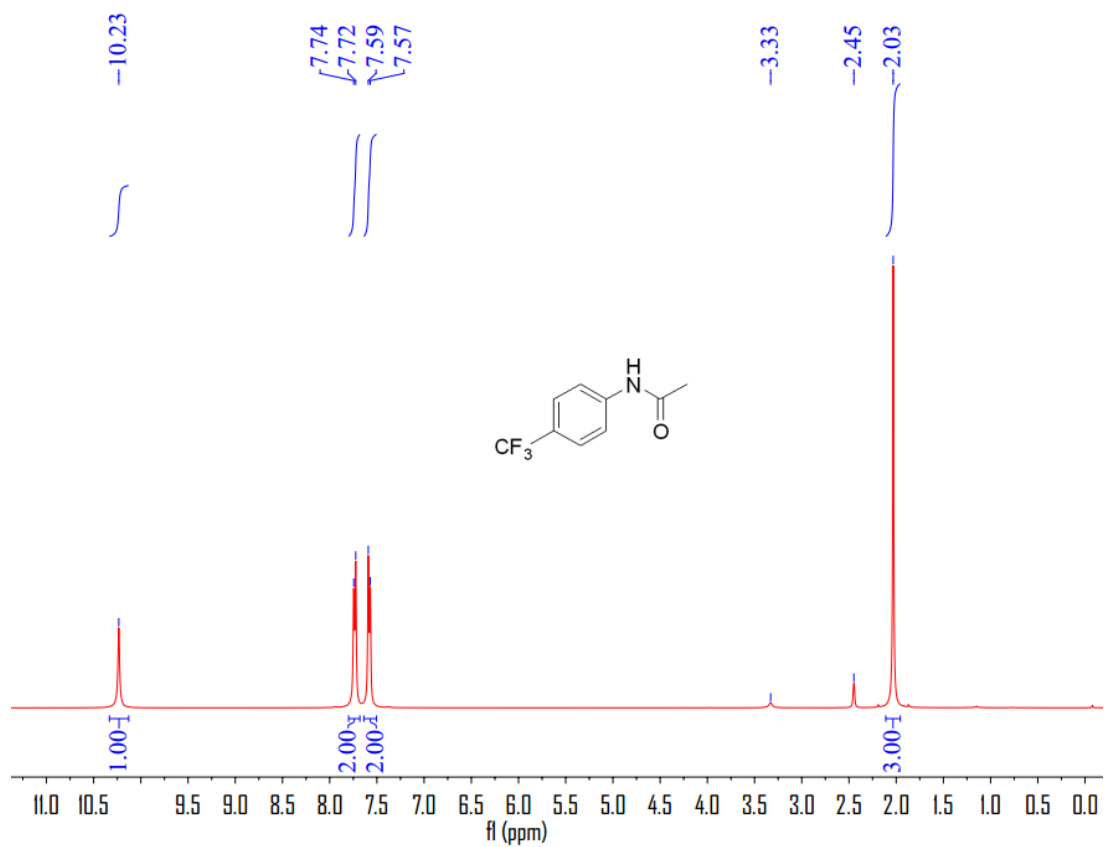

<sup>13</sup>C NMR of **4k**

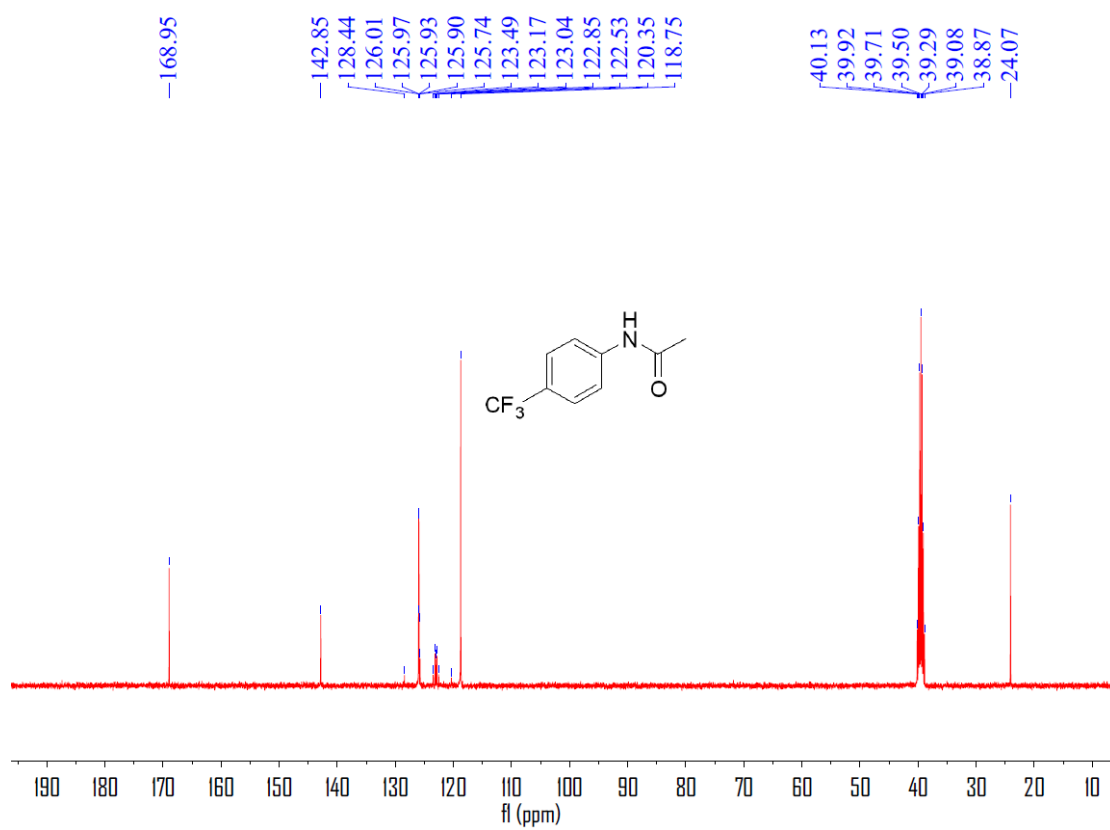

<sup>19</sup>F NMR of **4k**

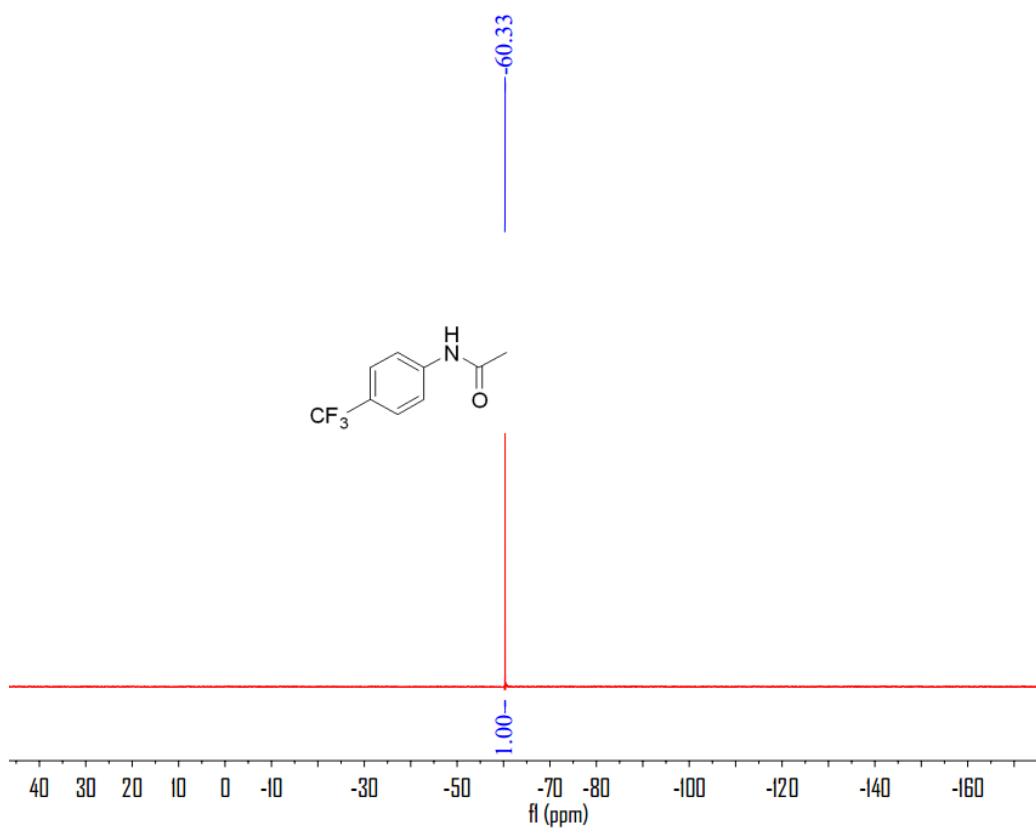

<sup>1</sup>H NMR of **41**

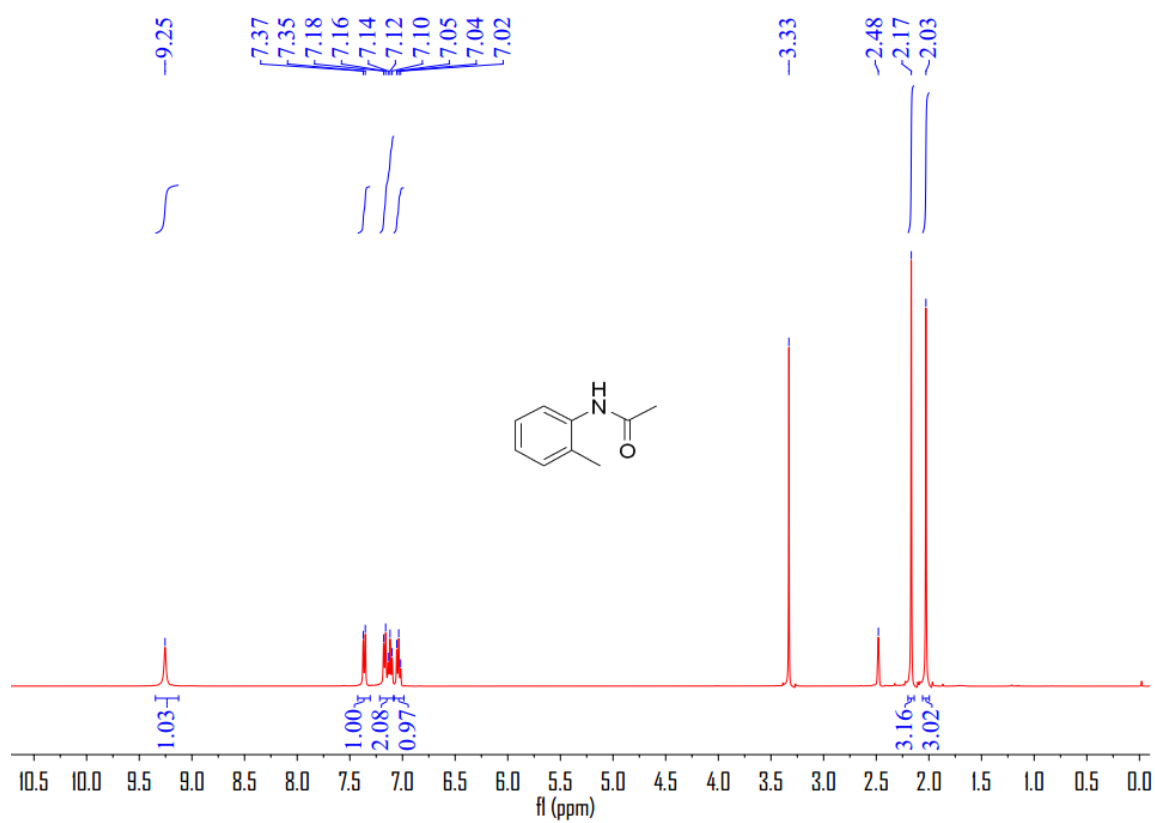

<sup>13</sup>C NMR of **41**

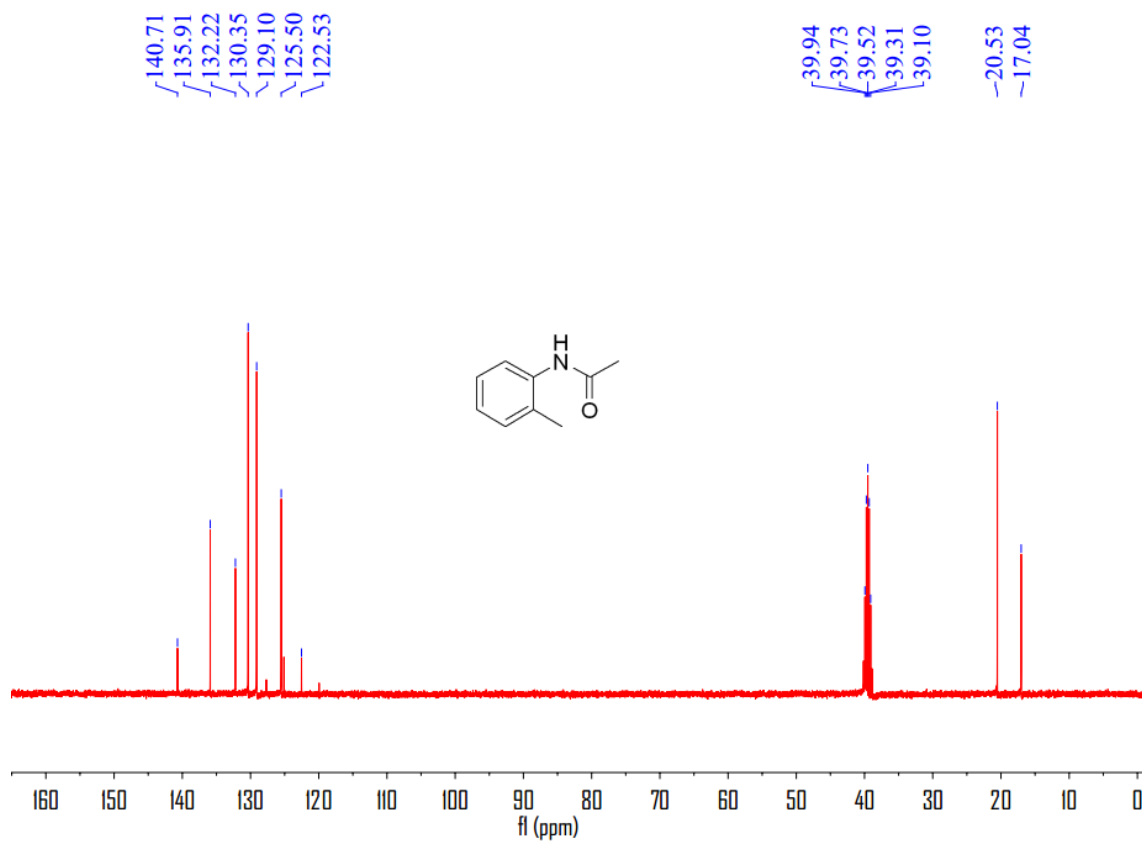

<sup>1</sup>H NMR of **4m**

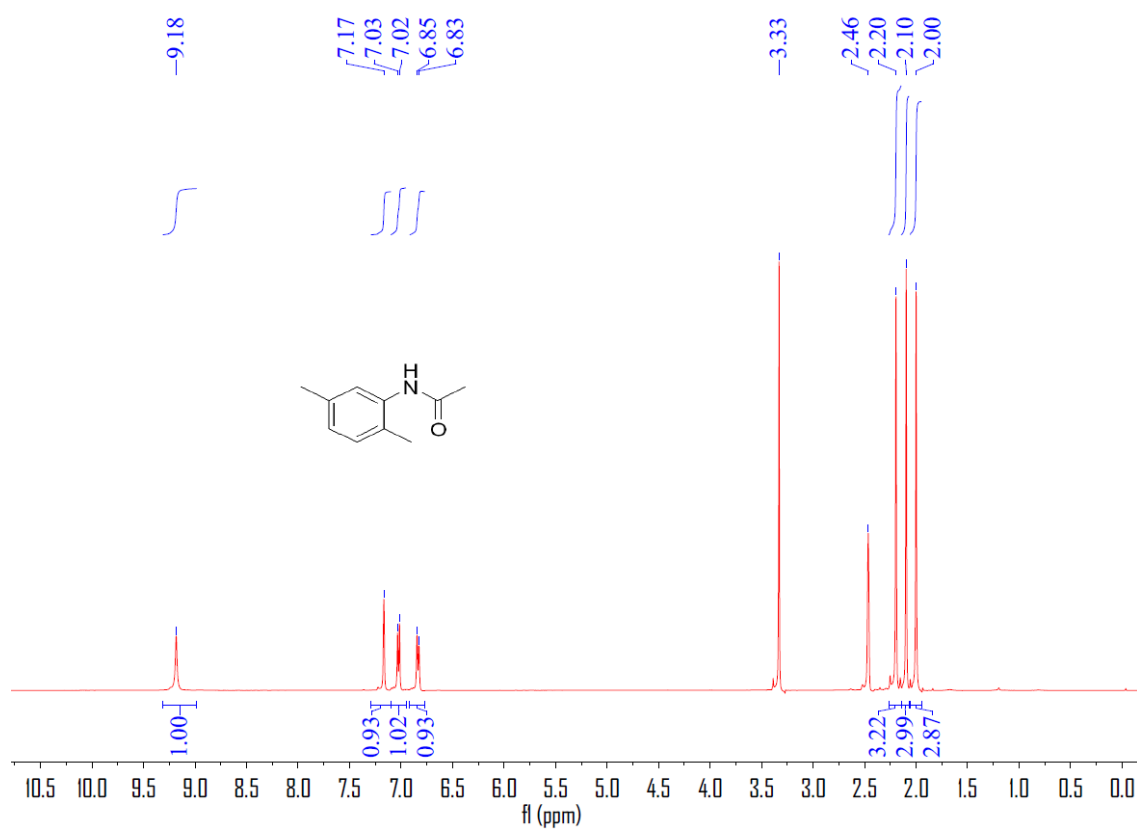

<sup>13</sup>C NMR of **4m**

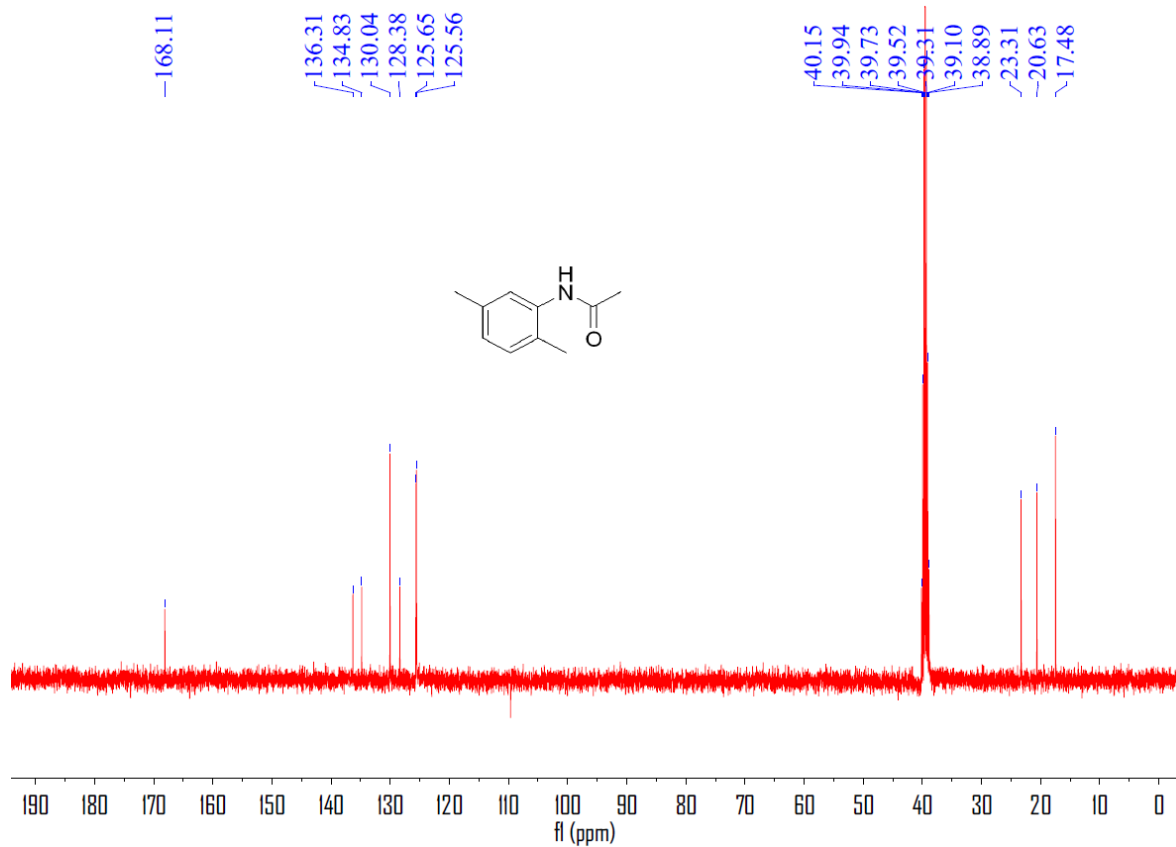



<sup>1</sup>H NMR of **4n**

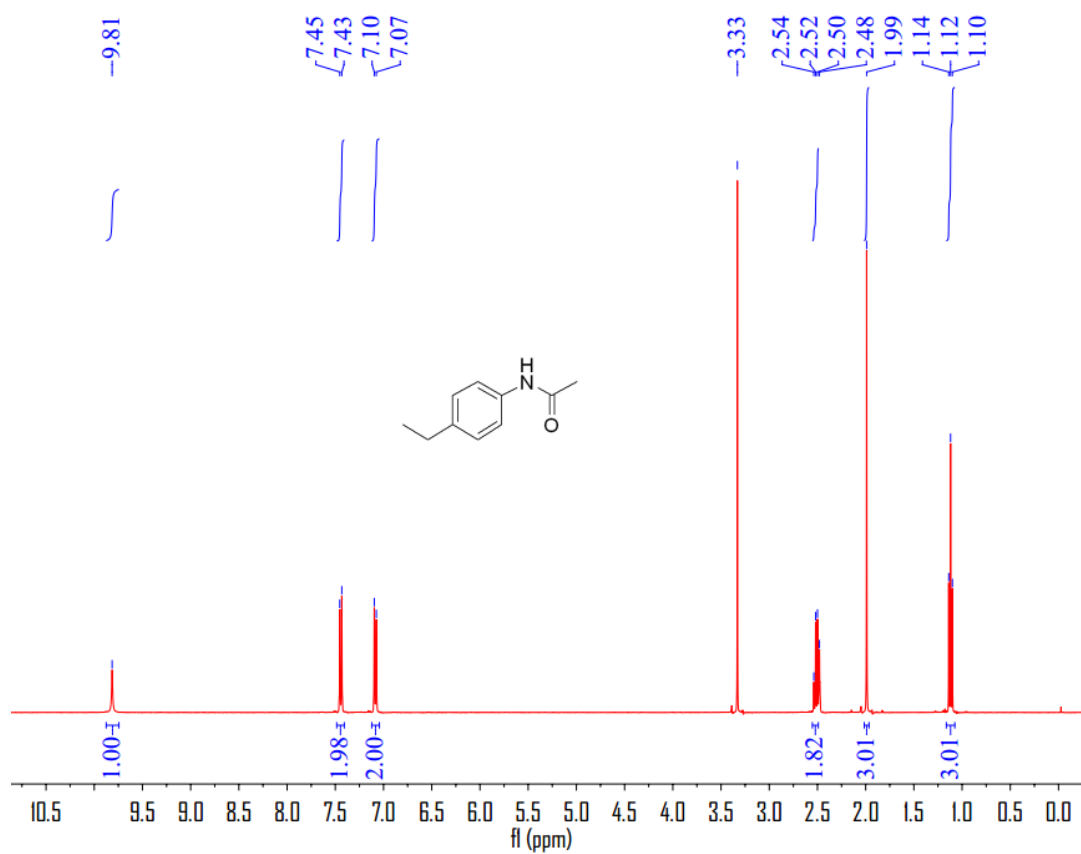

<sup>13</sup>C NMR of **4n**

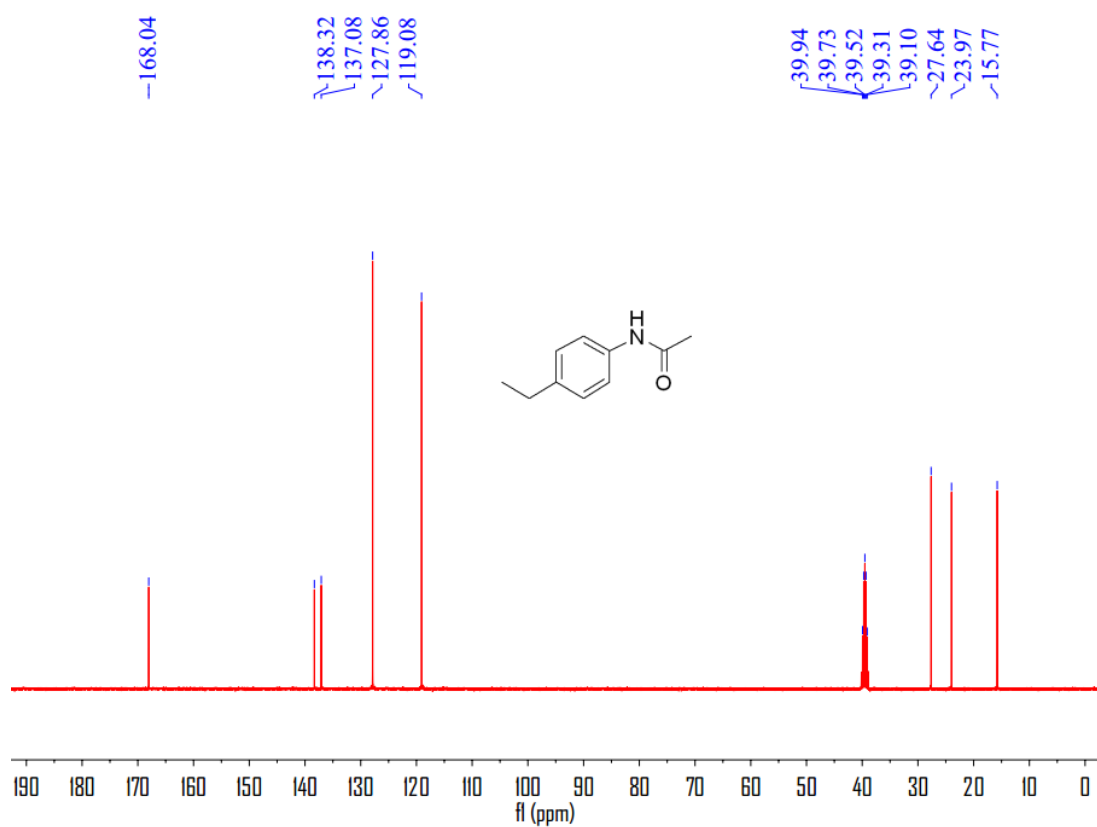

<sup>1</sup>H NMR of **4o**

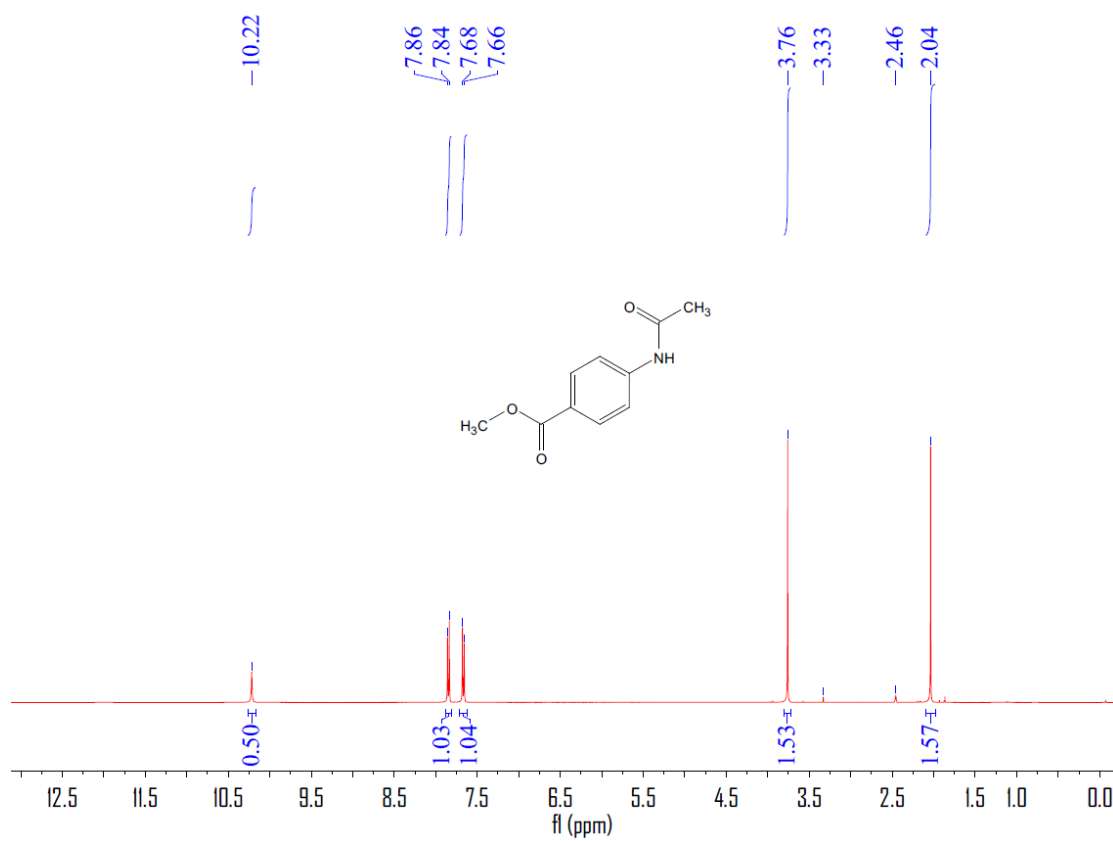

<sup>13</sup>C NMR of **4o**

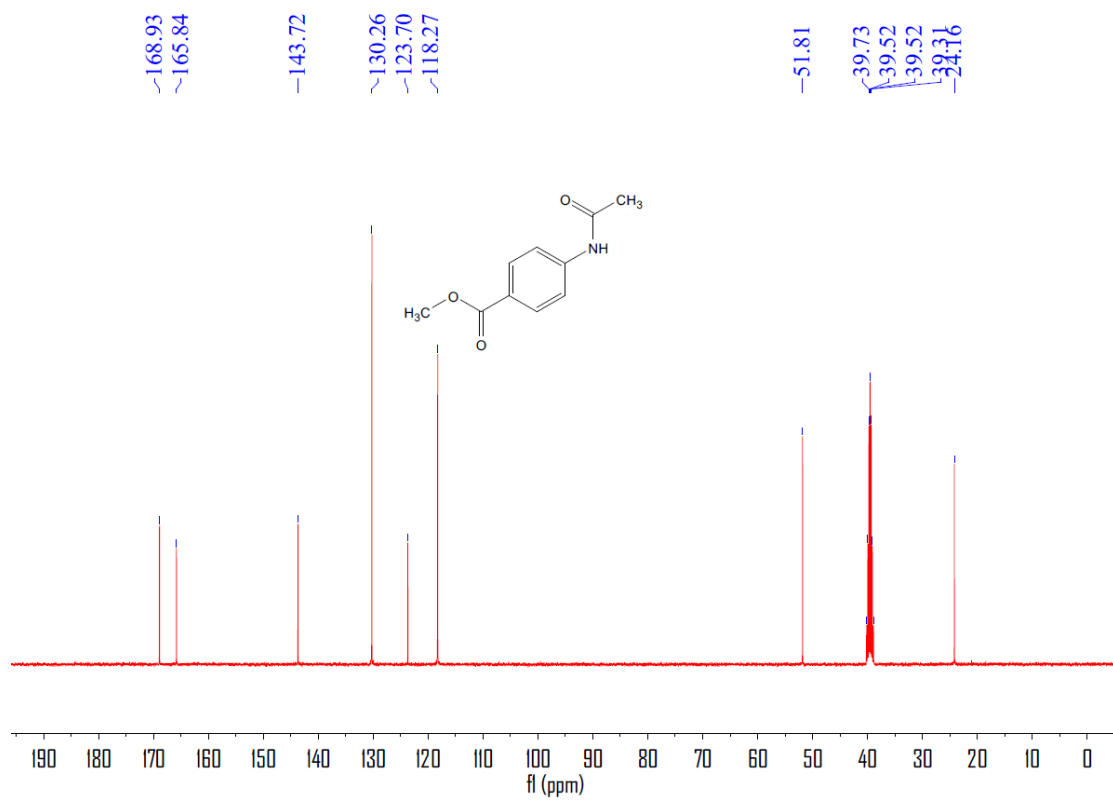

<sup>1</sup>H NMR of **4p**

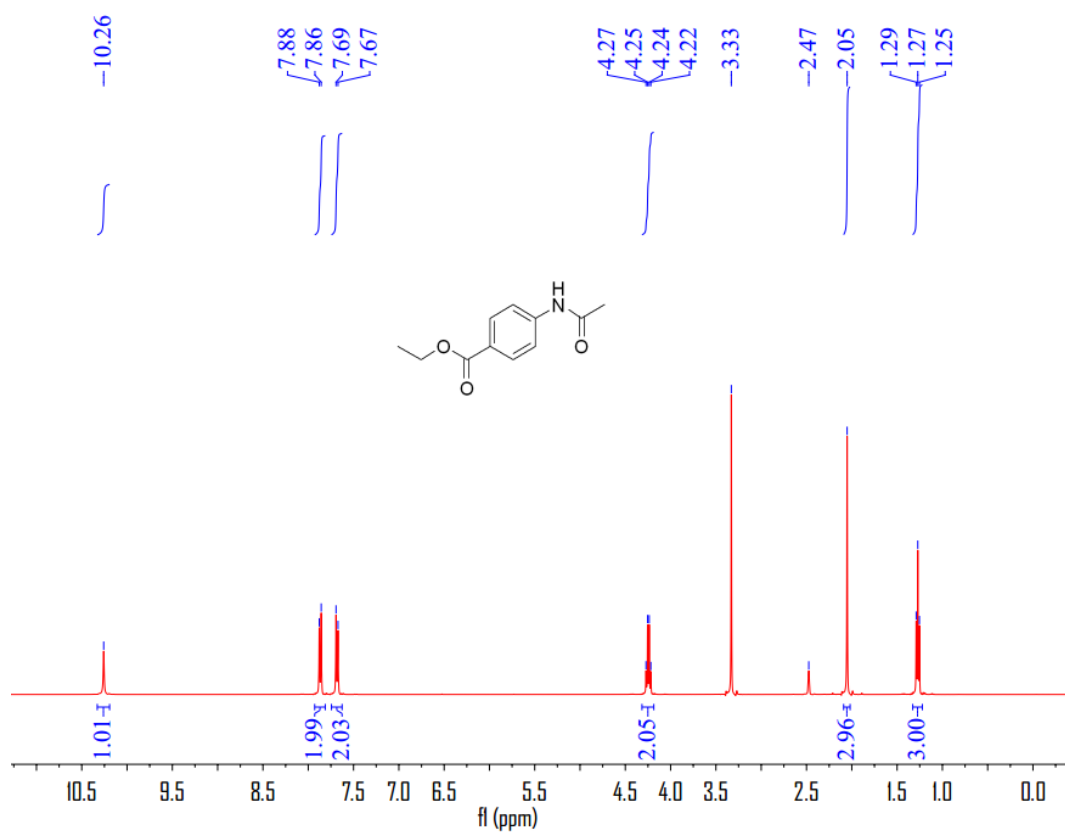

<sup>13</sup>C NMR of **4p**

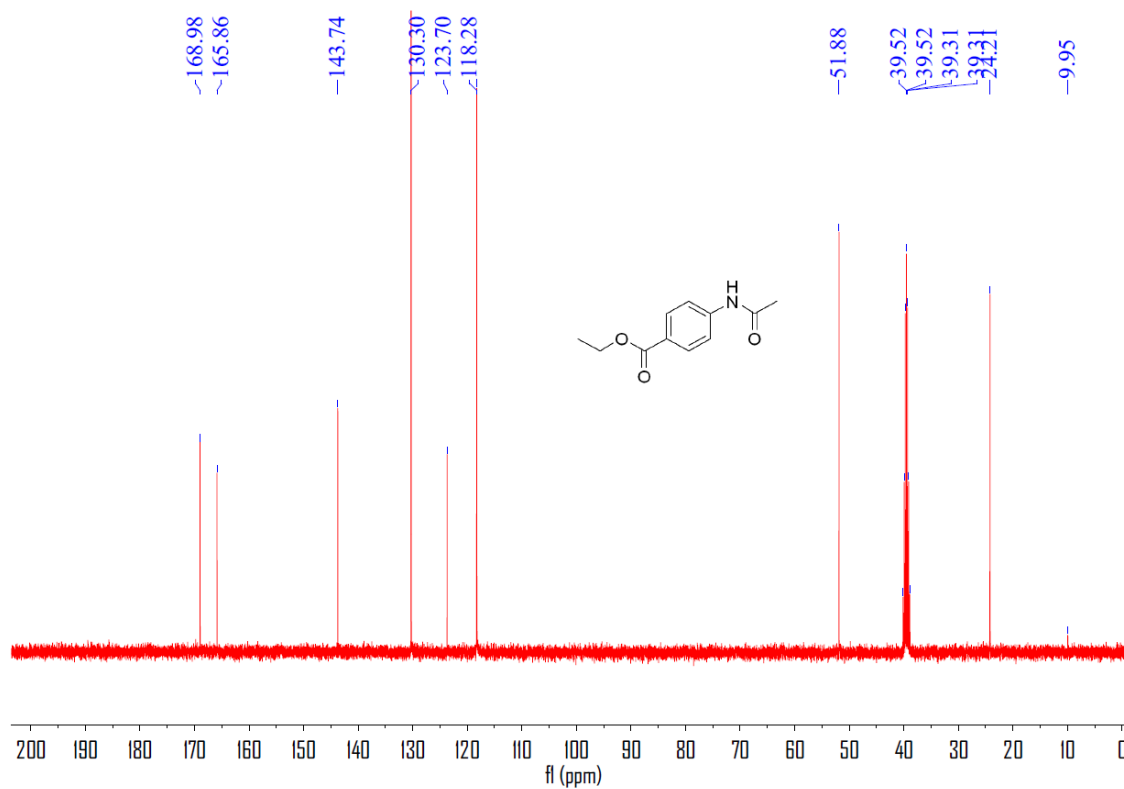

<sup>1</sup>H NMR of **4q**

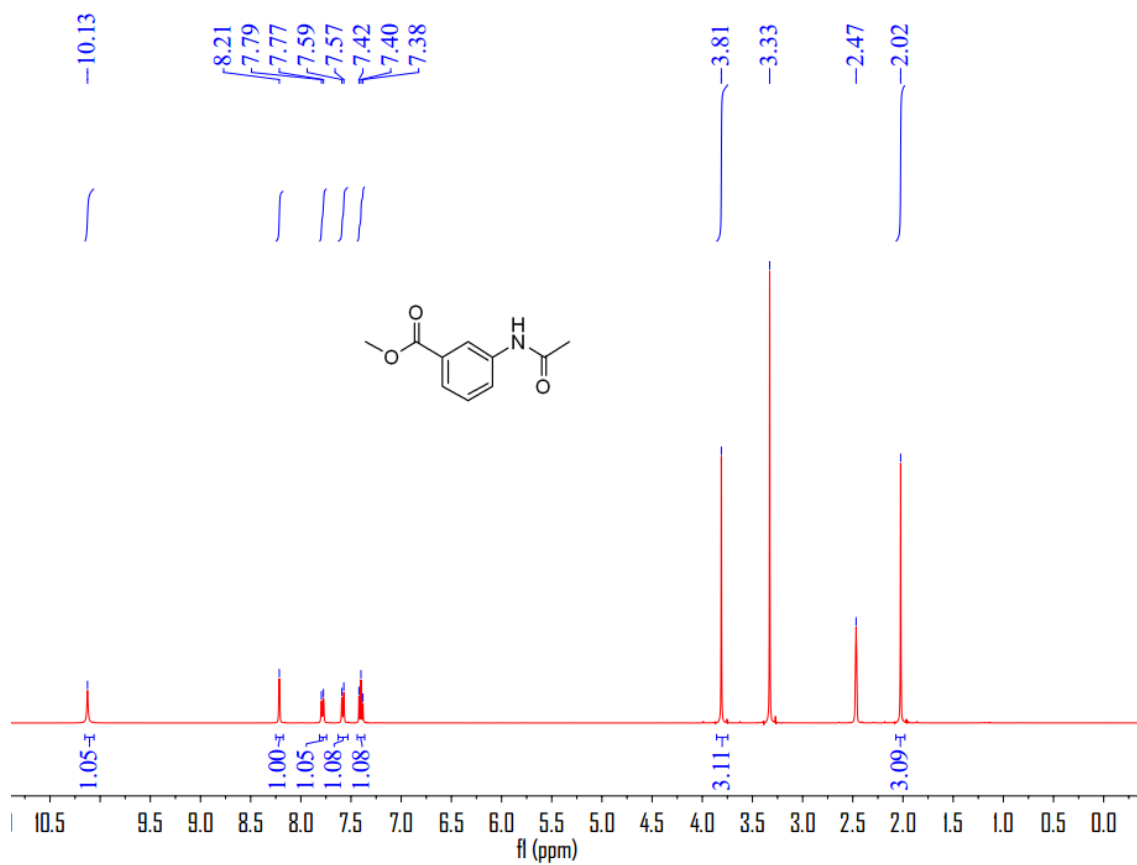

<sup>13</sup>C NMR of 4q

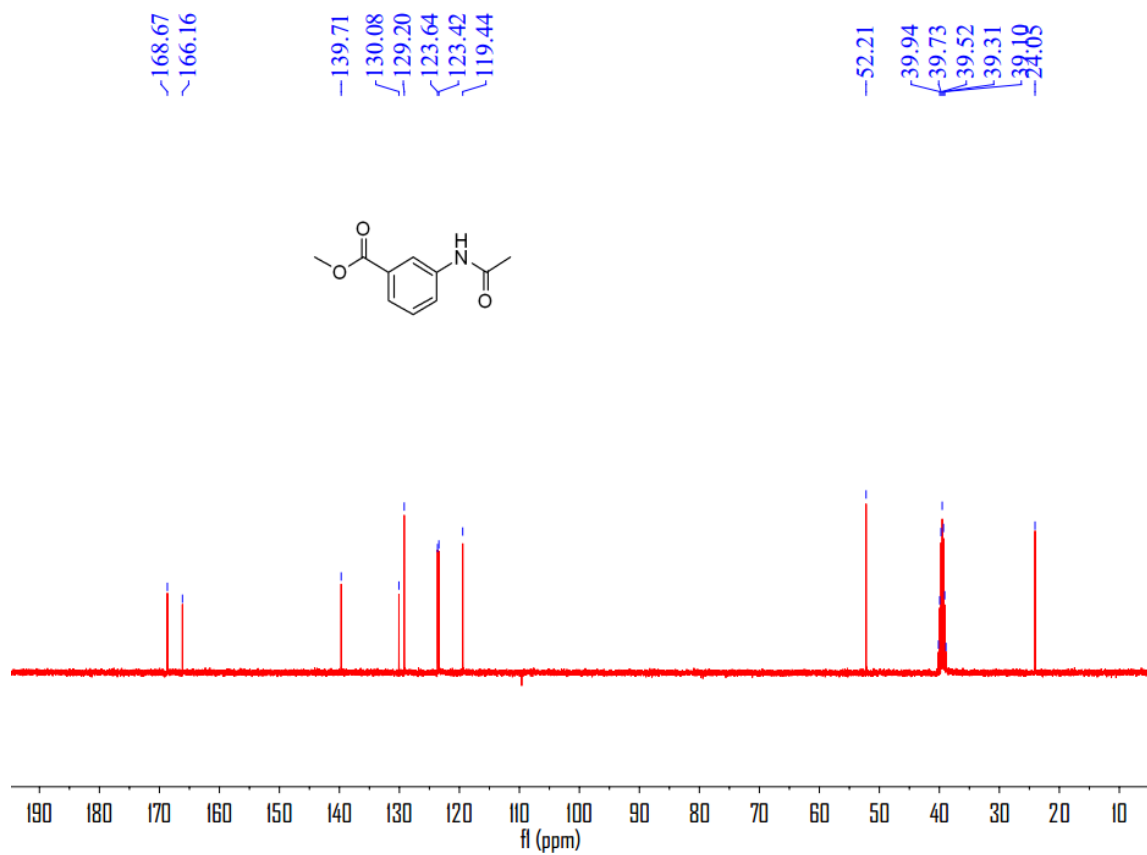

<sup>1</sup>H NMR of 4r

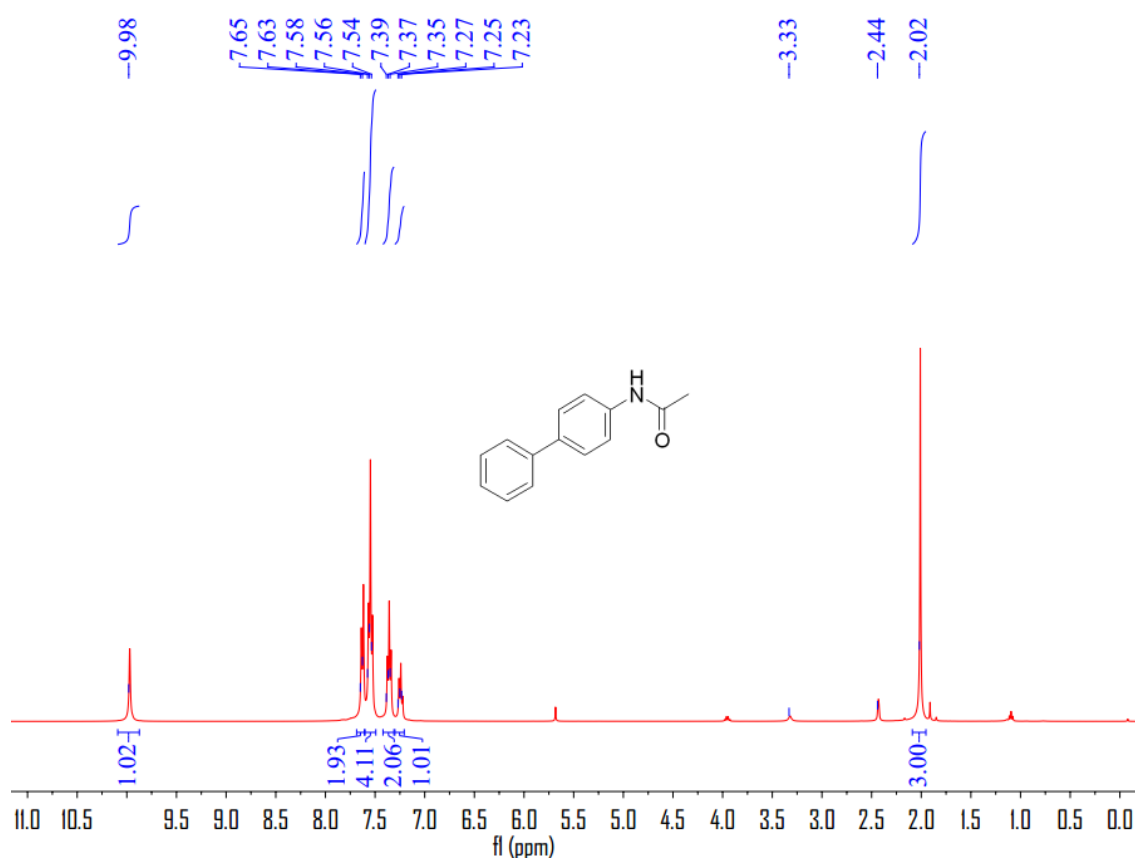

<sup>13</sup>C NMR of 4r

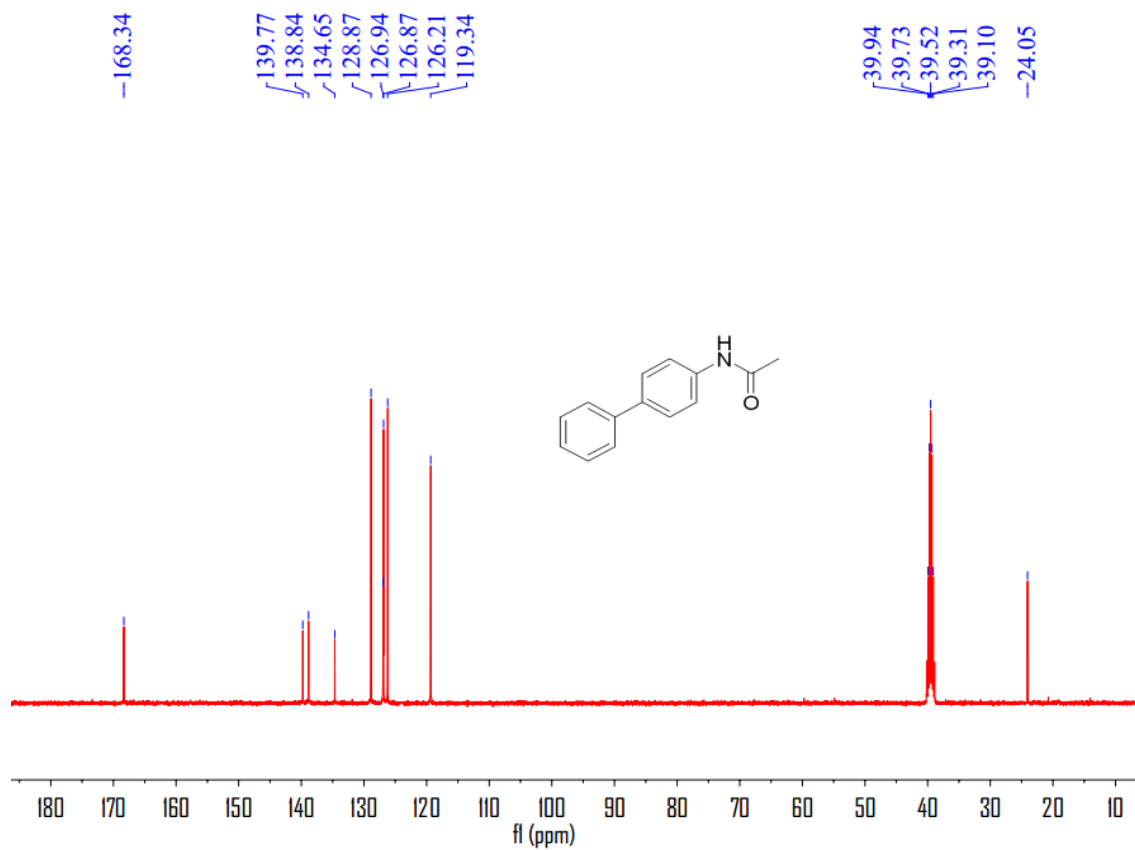

<sup>1</sup>H NMR of 4s

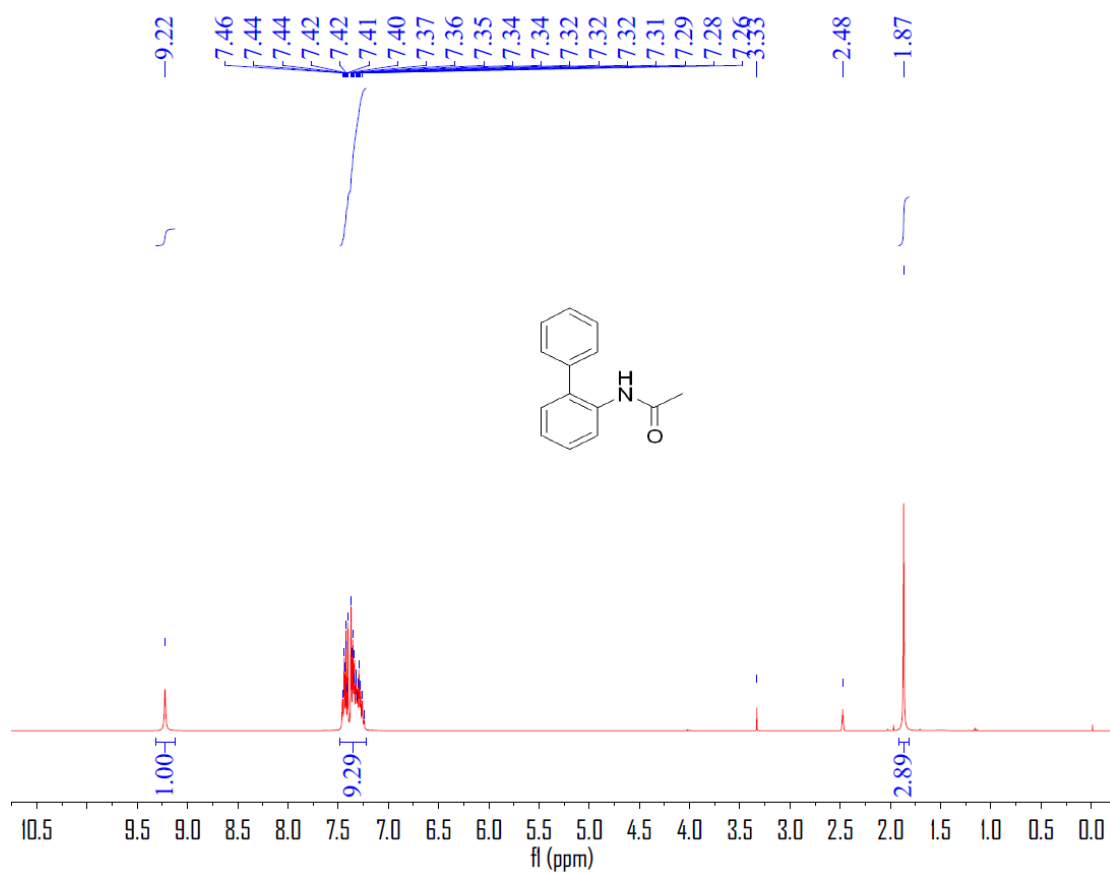

<sup>13</sup>C NMR of 4s

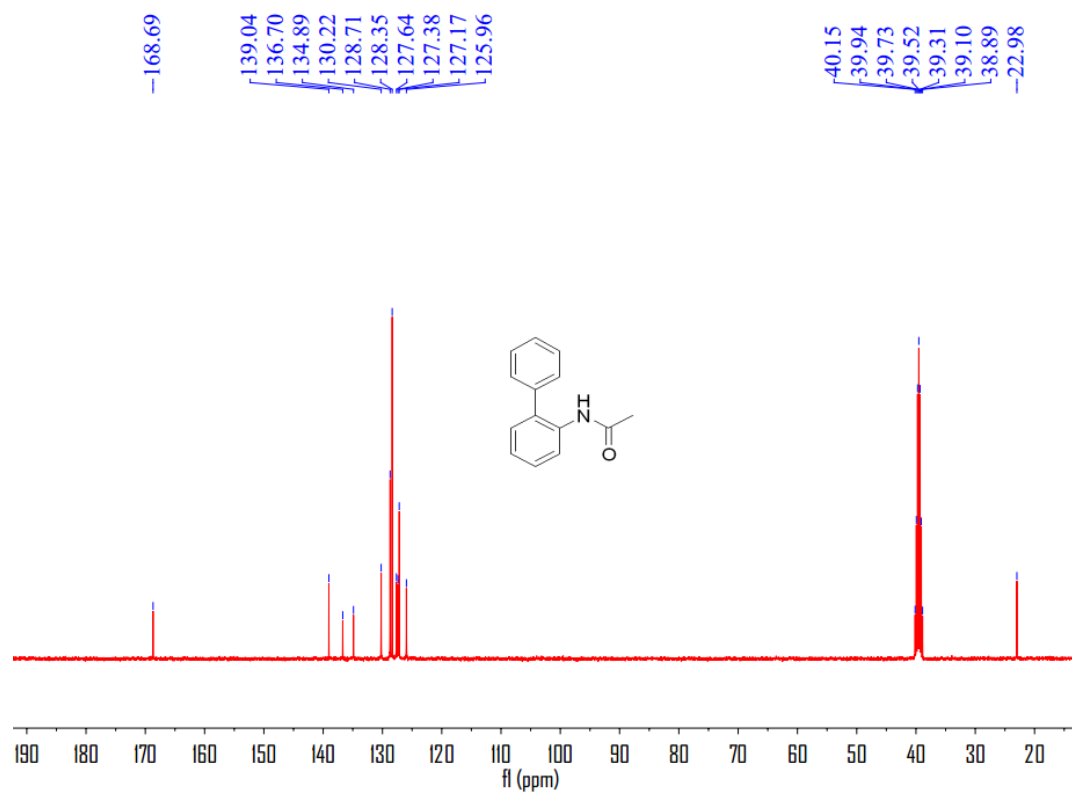

<sup>1</sup>H NMR of 4t

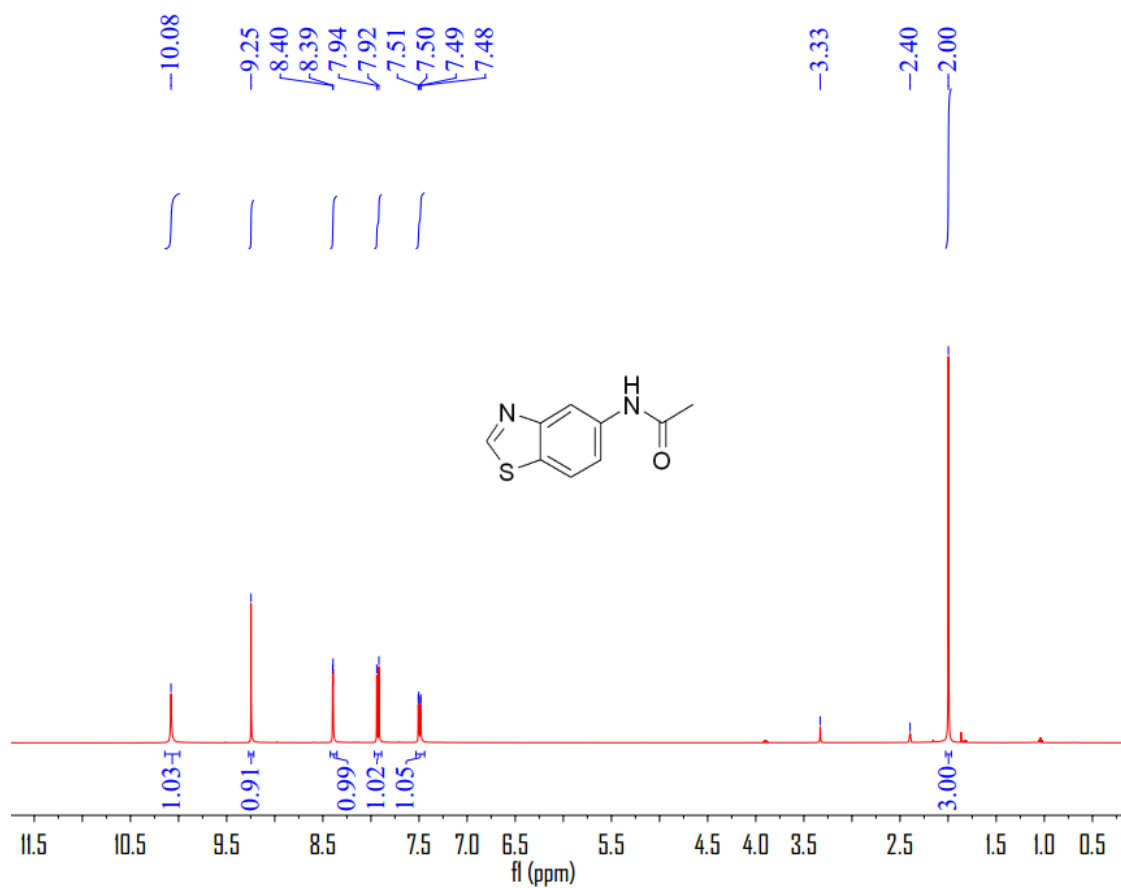

<sup>13</sup>C NMR of 4t

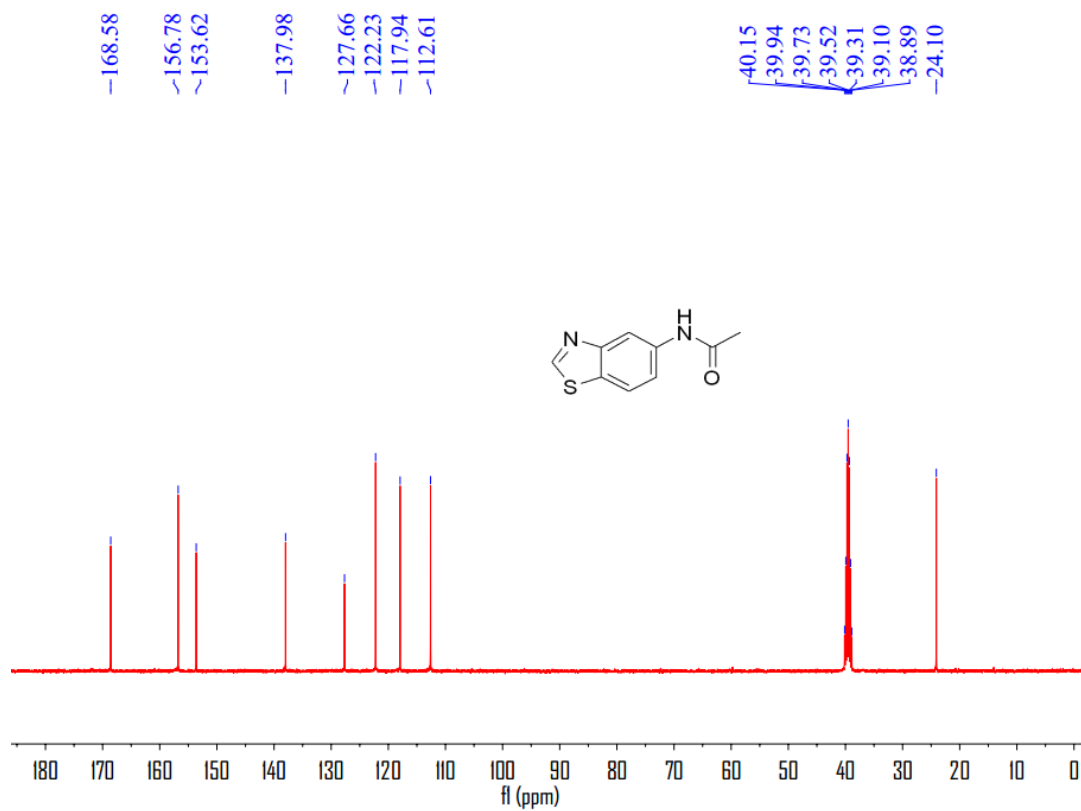

<sup>1</sup>H NMR of **4u**

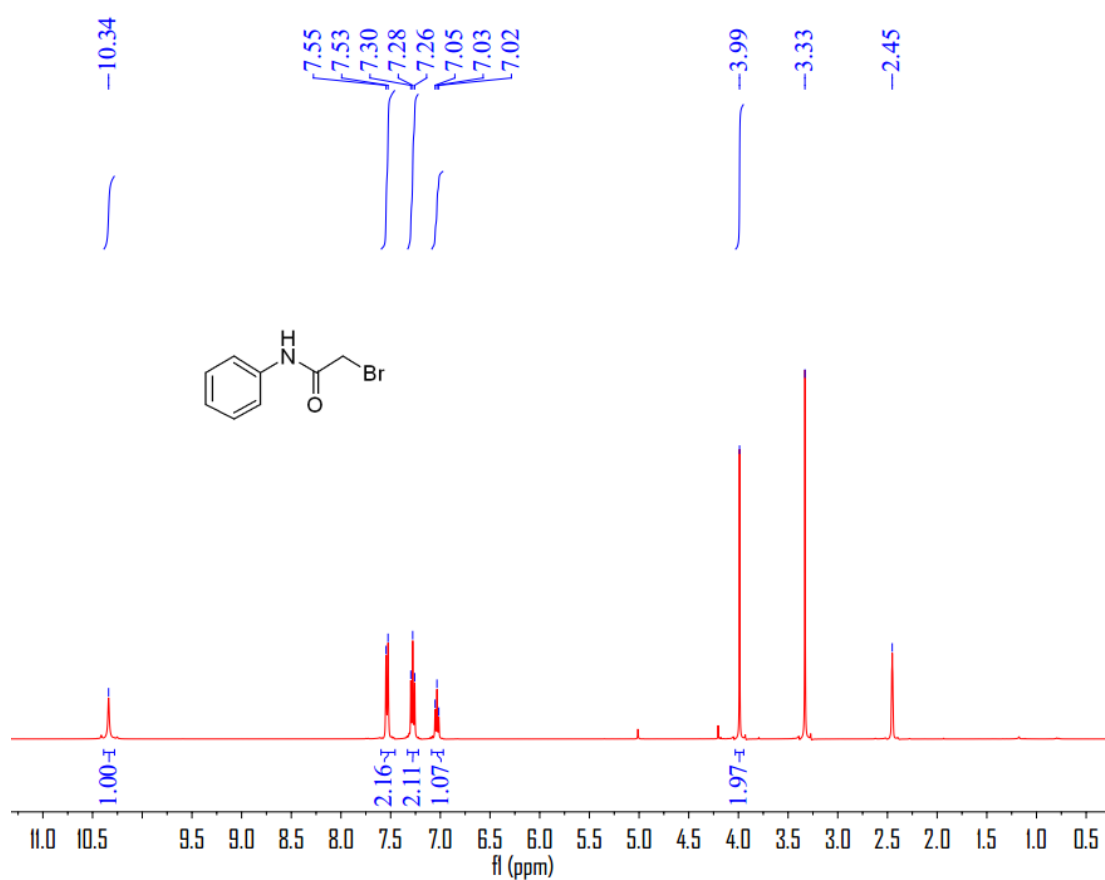

<sup>13</sup>C NMR of **4u**

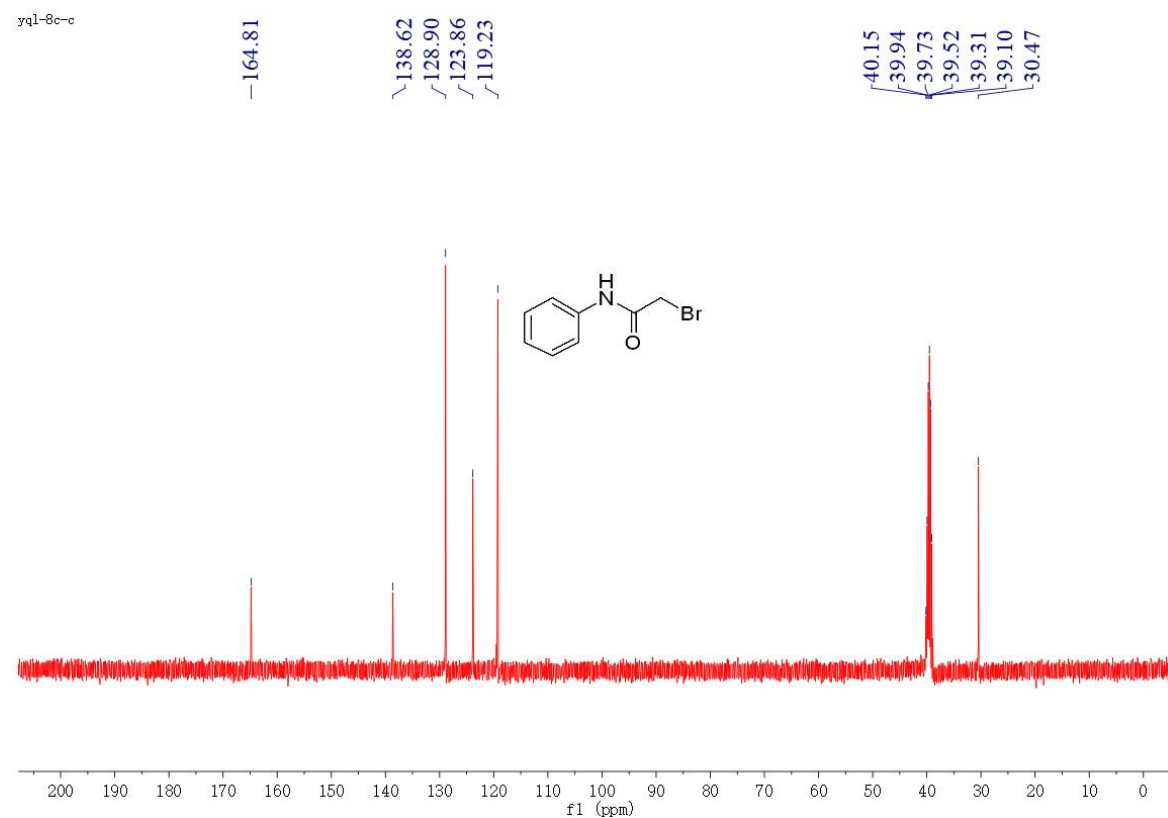



<sup>1</sup>H NMR of TEMPO-Ac

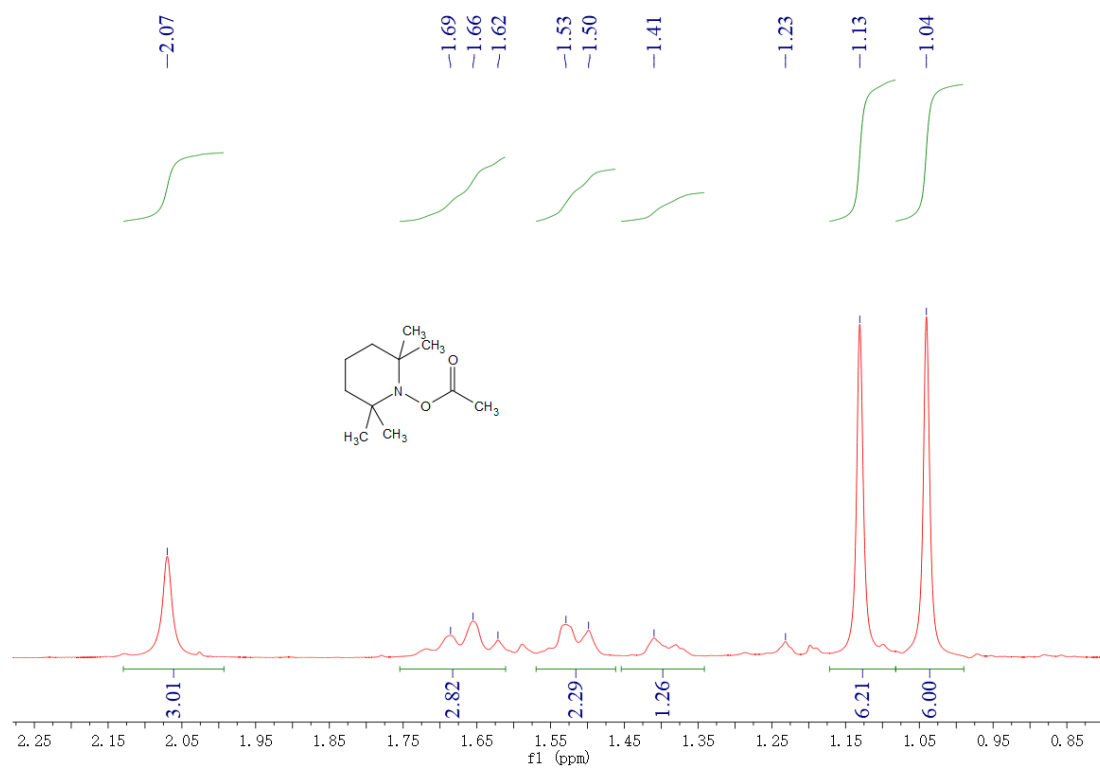

Supplement: d0ob02364g1.pdf [file d0ob02364g1.pdf]
